# 1 **Novel allosteric mechanism of dual p53/MDM2 and p53/MDM4**

## 2 **inhibition by a small molecule**

3 **Vera V. Grinkevich<sup>1</sup>, Vema Aparna<sup>2,#</sup>, Karin Fawkner<sup>1,#</sup>, Natalia Issaeva<sup>3</sup>, Virginia**  
4 **Andreotti<sup>4</sup>, Eleanor R. Dickinson<sup>5</sup>, Elisabeth Hedström<sup>1</sup>, Clemens Spinnler<sup>1</sup>, Alberto**  
5 **Inga<sup>6</sup>, Lars-Gunnar Larsson<sup>1</sup>, Anders Karlén<sup>2</sup>, Margareta Wilhelm<sup>1</sup>, Perdita E.**  
6 **Barran<sup>5</sup>, Andrei L. Okorokov<sup>7</sup>, Galina Selivanova<sup>1,\*</sup> and Joanna E. Zawacka-Pankau<sup>1,8,\*</sup>**

7  
8 <sup>1</sup>Department of Microbiology, Tumor and Cell Biology, Karolinska Institute, Stockholm, SE  
9 171 65, Sweden

10 <sup>2</sup>Division of Organic Pharmaceutical Chemistry, Department of Medicinal Chemistry,  
11 Uppsala University, S-751 23 Uppsala, Sweden

12 <sup>3</sup>Department of Otolaryngology/Head and Neck Surgery, UNC-Chapel Hill, Chapel Hill, NC,  
13 USA

14 <sup>4</sup>IRCCS Ospedale Policlinico San Martino, Genetics of Rare Cancers, 16132 Genoa, Italy

15 <sup>5</sup>Manchester Institute of Biotechnology, The School of Chemistry, The University of  
16 Manchester, M1 7DN, UK

17 <sup>6</sup>Department CIBIO, University of Trento, 38123, Trento, Italy

18 <sup>7</sup>Wolfson Institute for Biomedical Research, University College London, Gower Street,  
19 London, WC1E 6BT, UK

20 <sup>8</sup>Department of Medicine, Huddinge, Center for Hematology and Regenerative Medicine,  
21 Karolinska Institute, Stockholm, SE 141-57, Sweden

### 22 23 **\*Correspondence:**

24 Galina Selivanova, [Galina.Selivanova@ki.se](mailto:Galina.Selivanova@ki.se)

25 Joanna E. Zawacka-Pankau, [Joanna.zawacka-pankau@ki.se](mailto:Joanna.zawacka-pankau@ki.se)

26 # - these authors contributed equally to this study

27  
28 **Keywords:** p53; N-terminus, allosteric inhibition; MDM2; MDM4

29

30

31 **Abstract**

32 Restoration of the p53 tumor suppressor for personalised cancer therapy is a promising  
33 strategy. However, high-affinity MDM2 inhibitors have shown substantial side effects in  
34 clinical trials. Thus, elucidation of the molecular mechanisms of action of p53 reactivating  
35 molecules with alternative functional principle is of the utmost importance.

36 Here, we report a discovery of a novel allosteric mechanism of p53 reactivation through  
37 targeting the p53 N-terminus which blocks both p53/MDM2 and p53/MDM4 interactions.  
38 Using biochemical assays and molecular docking, we identified the binding site of two p53  
39 reactivating molecules, RITA and protoporphyrin IX (PpIX). Ion-mobility mass spectrometry  
40 revealed that the binding of RITA to serine 33 and serine 37 is responsible for inducing the  
41 allosteric shift in p53, which shields the MDM2 binding residues of p53 and prevents its  
42 interactions with MDM2 and MDM4. Our results point to an alternative mechanism of  
43 blocking p53 interaction with MDM2 and MDM4 and may pave the way for the development  
44 of novel allosteric inhibitors of p53/MDM2 and p53/MDM4 interactions.

45

46 **Contribution to the field**

47 Given the immense importance of the p53 tumor suppressor for cancer, efforts have been  
48 made to identify p53 activators, which sterically inhibit MDM2. Because high-affinity  
49 MDM2 inhibitors are facing problems with considerable side effects, other approaches are  
50 needed to reactivate p53 for improved cancer therapy. The allosteric mechanism of action of  
51 p53 activator RITA, which we discovered, and its dependence on the oncogenic switch, is an  
52 unexpected turn in the p53 story. Our findings provide a basis for the development of p53  
53 activators with a similar mode of functioning, either through the classical drug discovery  
54 route or through the drug repurposing approach. Allosteric modulators might have great

55 potential as single agents, or in combination with the standard of care. Further, p53  
56 modulators could serve as invaluable tools to better understand its biology.

57

## 58 **Introduction**

59 The transcription factor p53 is a major tumor suppressor. It is a critical regulator of cell  
60 homeostasis found in multicellular organisms in the Animal kingdom (Belyi et al., 2010).

61 p53 has a multi-domain structure and is considered an intrinsically disordered protein (IDP)  
62 (Dawson et al., 2003). p53 binds to its target promoters and regulates expression of the genes  
63 involved in cell cycle regulation and cell death. Upon activation by stress signals like DNA  
64 damage, telomere attrition, reactive oxygen species or oncogene activation, p53 is stabilized  
65 and activates or represses its target genes. p53 regulates a broad variety of cellular processes  
66 which include but are not limited to apoptosis, ferroptosis, cell cycle, DNA damage repair,  
67 senescence, metabolism, fertility or longevity (Levine, 2020).

68

69 Loss of *TP53* alleles leads to 100% cancer penetrance in mouse models and germline *TP53*  
70 mutations in humans predispose to the early onset of a variety of tumors (Kratz et al., 2021).

71 The loss-of-function or gain-of-function *TP53* gene mutations occur in approximately half of  
72 all human cancers. In tumors with intact *TP53* gene, p53 protein is rendered functionally inert  
73 mainly due to the deregulated E3 ubiquitin ligase MDM2 and its homolog MDM4. Both  
74 MDM2 and MDM4 are amplified in cancers or undergo posttranslational modifications  
75 which promote p53 inhibition. MDM2 is an E3 ubiquitin ligase, modified by various stress  
76 signals which affect its E3 ligase activity and/or affinity to p53. Inhibition of MDM2 by  
77 stress signals increases p53 half-life and activates its transcription function (Lozano and  
78 Levine, 2016). MDM2 and MDM4 work together to direct p53 for proteasomal degradation  
79 through polyubiquitination (Vousden and Prives, 2009). MDM2 and MDM4 also inhibit p53-

80 mediated transcription, through direct interactions with its N-terminal domain in the nucleus  
81 (reviewed in (Haupt et al., 2019)). Both proteins have p53 independent oncogenic functions  
82 and can inhibit other p53 protein family member, p73 protein (Dobbelstein and Levine,  
83 2020).

84

85 p53 was long considered undruggable. However, based on the known crystal structure of the  
86 p53 N-terminal in complex with the MDM2 N-terminus (Kussie et al., 1996), several high-  
87 affinity inhibitors targeting the p53-binding pocket of MDM2 have been developed to date.

88 First class of MDM2 inhibitors (MDM2i) includes nutlins, a series of cis-imidazoline analogs  
89 (IUPAC: 4-[(4S,5R)-4,5-bis(4-chlorophenyl)-2-(4-methoxy-2-propan-2-yloxyphenyl)-4,5-  
90 dihydroimidazole-1-carbonyl]piperazin-2-one) that replace the p53  $\alpha$ -helical peptide in  
91 MDM2 in the positions occupied by Phe<sup>19</sup>, Trp<sup>23</sup>, and Leu<sup>26</sup> of p53 (Vassilev et al., 2004).

92 The second and third class MDM2i are MI, spirooxindole compounds showing high efficacy  
93 in liposarcomas (Bill et al., 2016), RG compounds, analogs of nutlins, and piperidinones  
94 AMG-232 (Sun et al., 2014). Despite promising pre-clinical reports, idasanutlin (RG7388),  
95 the most clinically advanced MDM2i owned by Roche, failed to meet the primary end-point  
96 in Phase III clinical trial in AML and the trial was terminated due to futility (Mullard, 2020).

97 Thus, up-to-date no MDM2i has been made clinically available yet.

98 Since MDM2 acts in concert with MDM4, selective MDM2i are inefficient in tumors  
99 overexpressing MDM4 protein due to structural difference in the p53 binding pocket (Toledo  
100 and Wahl, 2007; Marine et al., 2006; Jiang and Zawacka-Pankau, 2020). Several inhibitors  
101 targeting MDM4 have been developed. Yet, a great promise for improved cancer therapy lies  
102 in dual inhibitors of p53/MDM2 and p53/MDM4 inhibitors, such as  $\alpha$ -helical p53 stapled  
103 peptidomimetic ALRN-6924, which is in phase I/II clinical development (Saleh et al., 2021).

104

105 A small molecule RITA has been identified by us in a cell-based screen for the p53  
106 reactivating compounds (Issaeva et al., 2004). RITA restores wild-type p53 in tumor cells by  
107 preventing p53/MDM2 interaction through allosteric shift in the intrinsically disordered N-  
108 terminus of p53 and affects the binding of p53 to MDM4 (Spinnler et al., 2011; Dickinson et  
109 al., 2015). RITA has also p53-independent functions (Wanzel et al., 2016; Peuguet et al.,  
110 2020).

111

112 Protoporphyrin IX (PpIX), a metabolite of aminolevulinic acid, a pro-drug approved by the  
113 FDA for photodynamic therapy topical skin lesions, reactivates p53 by inhibiting the  
114 p53/MDM2 interactions and p53/MDM4 interactions (Zawacka-Pankau et al., 2007; Jiang et  
115 al., 2019). In contrast to nutlin, neither RITA nor PpIX target MDM2, but bind to the p53 N-  
116 terminus (Zawacka-Pankau et al., 2007; Issaeva et al., 2004; Dickinson et al., 2015).  
117 However, how exactly its binding to p53 affects the p53/MDM2 and p53/MDM4 complexes  
118 remains unclear.

119

120 In the present study, we applied molecular and cell biology approaches and molecular  
121 modelling to map the region within the p53 N-terminus targeted by RITA and PpIX and to  
122 address the mechanism of their action. We found that RITA and PpIX target p53 outside of  
123 the MDM2-binding locus and identified the key structural elements in RITA molecule along  
124 with contact residues in p53, which are critical for the interaction. We found that the binding  
125 of RITA to a specific amino acid motif promotes a compact conformation of partially  
126 unstructured N-terminus, which inhibits the interaction with MDM2 and MDM4. Based on  
127 our results, we propose a model of a novel allosteric mechanism of p53 reactivation which is  
128 triggered by binding to the region spanning residues 33 – 37 of human p53.

129

130 **Materials and methods**

131 **In situ proximity ligation assay (PLA)**

132 *In situ* PLA was performed according to the Duolink® Proximity Ligation Assay PLA (Olink  
133 biosciences) protocol with modifications (see **Supplemental Experimental procedures** for  
134 details).

135

136 **Binding assays with [<sup>14</sup>C]-RITA**

137 For a small molecule-band shift assay purified proteins (20 μM) or 80 μg of total protein  
138 from cell lysates and [<sup>14</sup>C]-RITA (40 μM) were incubated in buffer B (50 mM HEPES, pH  
139 7.0, 150 mM NaCl, 35% glycerol) at 37°C/30 min and separated in standard TBE or gradient  
140 non-denaturing polyacrylamide gels. Gels were stained with Coomassie to visualize  
141 proteins and radioactivity was measured after 24-48h exposure in Fujifilm phosphor screen  
142 cassette and Phosphoimager Amersham Biosciences.

143 SDS-PAGE separation of cell lysates to visualize RITA/protein complexes was performed in  
144 10% gel after snap heating at 90°C of lysates in the loading buffer. Proteins were depleted  
145 from cell lysates using anti-p53 DO-1 antibody (Santa Cruz), anti-actin antibody (AC-15,  
146 Sigma), immobilized on protein A-conjugated DynaBeads (Invitrogene).

147 Co-immunoprecipitation of p53/MDM2 or p53/MDM4 was performed as described  
148 previously (Issaeva et al., 2004). MDM2 in precipitates from mouse tumor cells MCIM SS  
149 cells expressing wtp53 (Magnusson et al., 1998) was detected by 4B2 antibody, a gift from  
150 Dr. S. Lain. MDMX antibody was from Bethyl laboratories.

151

152 **Scintillation Proximity Assay (SPA)**

153 SPA PVT Protein A beads (500μl/sample, Perkin Elmer) were incubated for 2h with anti-  
154 GST antibodies (1:100). 0.1 μg/μl of studied protein in SPA buffer (GST, Np53, Np53(33/37))

155 was added to GST-coated SPA beads. 10  $\mu$ l [ $^{14}$ C]-RITA (52  $\mu$ Ci) diluted 4 times in SPA  
156 buffer were added to protein samples (1.3  $\mu$ Ci). Unlabelled RITA was used as a cold  
157 substrate. SPA buffer was added to the final volume of 100  $\mu$ l. Complexes were incubated for  
158 1h at 37°C and luminescence released by the [ $^{14}$ C]-RITA-excited beads was measured in  
159 standard microplate reader (Perkin Elmer).

160

### 161 **Circular dichroism spectroscopy (CD)**

162 Recombinant proteins (50  $\mu$ M) were incubated with RITA (reconstituted in 100% isopropyl  
163 alcohol (IPA)) or with the same amount of IPA as a blank at a 1:2 molar ratio in 25 mM  
164 ammonium acetate at 37°C for 20 min. This results in a final concentration of IPA of 5% in  
165 each case.

166 All CD spectra were acquired using JASCO instrument. 0.1 cm Hellma® cuvettes were used  
167 and measurements were performed in the far-UV region 260 – 195 nm at 21°C. CD spectra  
168 were recorded with a 1 nm spectral bandwidth, 0.5 nm step size with scanning speed 200  
169 nm/min. The spectra were recorded 5 times and the data are representative of at least three  
170 independent experiments.

171

### 172 **Mass Spectrometry and Ion Mobility Mass Spectrometry (IM-MS)**

173 Mass spectrometry and IM-MS were made on an in-house modified quadrupole time-of-flight  
174 mass spectrometer (Waters, Manchester, UK) containing a copper coated drift cell of length  
175 5cm. The instrument, its operation and its use in previous studies on p53 have been described  
176 elsewhere (Jurneczko et al., 2013; Dickinson et al., 2015). Np53 was prepared at a  
177 concentration 50  $\mu$ M in 50 mM Ammonium Acetate. Protein was incubated with RITA at a  
178 1:2 molar ratio at 37°C for 30 minutes before analysis. 5% isopropyl alcohol was added to  
179 solubilize the ligand in aqueous solution, consistent with CD spectroscopy data. In all cases

180 three repeats were taken, each on different days (For details see **Supplemental**  
181 **Experimental procedures**).

182

### 183 **Molecular Modelling**

184 Homology model of p53 was developed using the Rosetta server (Kim et al., 2004, 2005;  
185 Rohl et al., 2004; Chivian and Baker, 2006). Generated models were validated and fitted to  
186 the cryo-EM data (Okorokov et al., 2006). Domain fitting into the 3D map of p53 was  
187 performed automatically using UCSF Chimera package from the Resource for Biocomputing,  
188 Visualization, and Informatics at the University of California, San Francisco (supported by  
189 NIH P41 RR-01081), ([www.cgl.ucsf.edu/chimera/](http://www.cgl.ucsf.edu/chimera/)) and further refined by UROX  
190 (<http://mem.ibs.fr/UROX/>). (For details see **Supplemental Experimental procedures**).

191

### 192 **Yeast-based reporter assay**

193 The yeast-based functional assay was conducted as previously described (Tomso et al.,  
194 2005). Briefly, the p53-dependent yeast reporter strain yLFM-PUMA containing the  
195 luciferase cDNA cloned at the *ADE2* locus and expressed under the control of PUMA  
196 promoter (Inga et al., 2002) was transfected with pTSG-p53 (Resnick and Inga, 2003), pRB-  
197 MDM2 (generously provided by Dr. R. Brachmann, University of California, Irvine, CA,  
198 USA), or pTSG-p53 S33/37 mutant and selected on double drop-out media for TRP1 and  
199 HIS3. Luciferase activity was measured 16 hrs after the shift to galactose-containing media as  
200 described previously (Inga et al., 2002; Jiang et al., 2019) and the addition of 1  $\mu$ M RITA, or  
201 10  $\mu$ M nutlin (Alexis Biochemicals), or DMSO. Presented are average relative light units and  
202 the standard errors obtained from three independent experiments each containing five  
203 biological repeats. The Student's t-test was performed for statistical analysis with  $p \leq 0.05$ -

204



205 **Results**

206

207 **RITA interacts with p53 in cancer cells.**

208 Our previous findings indicate that RITA interacts with the N-terminus of p53 *in vitro*  
209 (Issaeva et al., 2004). To test whether RITA binds to p53 *in cellulo*, we analyzed the  
210 complexes of radioactively labelled [<sup>14</sup>C]-RITA with proteins formed in HCT 116 colon  
211 carcinoma cells carrying wild-type p53 and in their p53-null counterparts (HCT 116 *TPp53*<sup>-/-</sup>  
212 ). To visualize the RITA/protein complexes, we analyzed cell lysates under mild denaturing  
213 conditions using polyacrylamide gel electrophoresis (PAGE) and detected the position of  
214 RITA and p53 by autoradiography and Western blot, respectively. Under mild denaturing  
215 conditions [<sup>14</sup>C]-RITA migrated with the electrophoretic front in HCT 116 *TPp53*<sup>-/-</sup> lysates  
216 (**Figure 1A**), whereas in HCT 116 cell lysates the migration was shifted, and the position of  
217 the major band coincided with that of p53. This indicates the formation of complex between  
218 p53 and RITA. Immunodepletion of p53 from the lysates using DO-1 antibody (**Figure 1A**)  
219 significantly decreased the intensity of the radioactive band supporting the band represents  
220 the p53/RITA complex.

221

222 In a small-molecule band shift assay, we separated [<sup>14</sup>C]-RITA/cellular proteins complexes  
223 by non-denaturing electrophoresis and detected [<sup>14</sup>C]-RITA by autoradiography (**Figure 1B**).  
224 The major band of RITA/protein complex in HCT 116 cells coincided with that of p53  
225 (**Figure 1B**). The absence of this radioactive band in the p53-null cells (**Figure 1B**) indicates  
226 that it represents RITA bound to p53. Taken together, our data provides evidence for the  
227 interaction of RITA with p53 in cancer cells.

228

229

230 **RITA interacts with the N-terminus of p53.**

231 We have shown previously that RITA interacts with N-terminal domain of p53 (Issaeva et al.,  
232 2004). Here, using small-molecule band shift assay we confirmed the interaction of RITA  
233 with the recombinant p53 N-terminus. Upon incubation, [<sup>14</sup>C]-RITA formed a complex with  
234 Glutathione-S-transferase (GST)-fusion p53 N-terminus (Np53) (amino acids 2-65) (**Figure**  
235 **1C**) but only weakly interacted with GST-tag (**Figure 2B**). In contrast, RITA did not bind to  
236 human fibrinogen (**Figure 1C**), suggesting a selective interaction with p53. Human serum  
237 albumin (HSA), a known carrier of various drugs in blood (Koehler et al., 2002), was used as  
238 the positive drug binding control (**Figure 1C**). Under standard denaturing conditions [<sup>14</sup>C]-  
239 RITA/protein complexes were disrupted (**Figure 1D**), suggesting that this interaction is  
240 reversible. Non-labelled RITA readily competed out the [<sup>14</sup>C]-RITA from the complex with  
241 Np53 at a low molecular excess, 1:1 or 1:2.5 (Supplementary Figure S1A). However, it did  
242 not efficiently compete with the [<sup>14</sup>C]-RITA/HSA complex (Supplementary Figure S1B)  
243 suggesting a different mode of interaction.

244

245 **RITA binding site is located in the proximity to leucine 35 in human Np53.**

246 To identify p53 residues involved in the binding to RITA, we generated a series of p53  
247 deletion mutants and assessed their interaction with RITA (**Figure 2A**). Deletion of the first  
248 25 residues containing the MDM2 binding site or mutations in residues 22/23 required for the  
249 interaction with MDM2 did not affect the binding of p53 to RITA, as assessed by small  
250 molecule band shift assay (**Figure 2B**, upper panel). These results argue against the binding  
251 of RITA within the MDM2 site of p53. Notably, Np53(38-58) peptide did not interact with  
252 RITA either (**Figure 2B**, lower panel). Together, our results indicate that RITA target amino  
253 acid sequence is located between residues 25-38 (**Figure 2A and B**). Np53(35-65) interacted

254 with RITA approximately 50% less efficiently than Np53(2-65) (**Figure 2B**). Thus, we  
255 concluded that RITA targets residues located in the proximity to leucine 35.

256

## 257 **Molecular modelling reveals the binding site for RITA outside the p53 interface with** 258 **MDM2**

259 The X-ray crystallographic analysis of the p53-MDM2 complex structure shows that the N-  
260 terminal p53 region binds the MDM2 hydrophobic groove in the  $\alpha$ -helical form (Kussie et al.,  
261 1996). The N-terminal region of p53 is largely disordered, highly flexible and forms  
262 amphipathic helical structure facilitated by the interaction with MDM2 (Wells et al., 2008).  
263 Taking into account the available information on the structural organization of the p53 N-  
264 terminus (Okorokov et al., 2006), our previous findings that RITA induces allosteric shift in  
265 p53 (Dickinson et al., 2015) and our mapping results using N-terminal mutants (**Figure 2**),  
266 we performed Monte Carlo conformational search to explore the possible binding modes of  
267 RITA to the p53 N-terminus (Schrödinger). The MCMMLMOD search on the RITA-p53  
268 complex found 3492 low energy binding modes within 5 kcal/mol above the global  
269 minimum. Among these, the tenth lowest energy binding mode, 2.1 kcal/mol above the  
270 global minimum, appeared reasonable with respect to the placement and orientation of RITA  
271 molecule. This model implies that the binding of RITA involves the formation of hydrogen  
272 bonds between its terminal hydroxyl groups and serine 33 and serine 37 of p53, as well as  
273 hydrophobic interactions with proline 34 and 36 via one of its thiophene and the furan rings  
274 (**Figure 3A and B** and **Supplemental video 1**). Hydrogen bonds and hydrophobic  
275 interactions between RITA and the p53 SPLPS amino acid sequence result in the increase of  
276 already limited flexibility of this region (**Figure 3A and B**).

277

278 Molecular dynamic simulations suggest that leucine-rich hydrophobic clusters within

279 residues 19-26 and 32-37 stabilize the folding and formation of  $\alpha$ -helices in the N-terminus  
280 (Espinoza-Fonseca, 2009). According to this study, the MDM2-contacting residues F<sup>19</sup>, W<sup>23</sup>  
281 and L<sup>26</sup> located in  $\alpha$ -helix of p53 (residues 16-26) are facing inwards and are tucked inside,  
282 stabilized by the formation of hydrophobic leucine clusters, while more hydrophilic residues  
283 of the  $\alpha$ -helix are exposed to the solvent as supported by the tryptophan fluorescence assay  
284 (Kar et al., 2002). On the other hand, the X-ray structure of the MDM2-p53 peptide complex  
285 (1YCQ.pdb) shows that MDM2-contacting residues are facing out (**Figure 3C**). This  
286 indicates that the binding to MDM2 requires a partial unwinding of the  $\alpha$ -helix to flex out  
287 F<sup>19</sup>, W<sup>23</sup> and L<sup>26</sup>, as illustrated in **Figure 3B** and **3C**. Our model indicates that RITA, by  
288 increasing the rigidity of the proline-containing SPLPS motif, induces a conformational trap  
289 in a remote MDM2 binding site. Next, we propose that constraints imposed by RITA prevent  
290 solvent exposure of F<sup>19</sup>, W<sup>23</sup> and L<sup>26</sup> residues, thus counteracting the p53/MDM2 interaction  
291 (**Figure 3B** and **3C**).

292 Conformational change induced by RITA is expected to impinge on other protein interactions  
293 involving the p53 N-terminus. The binding of p53 to MDM2 homolog, MDM4, requires the  
294 formation of an  $\alpha$ -helix as well as exposure of the same p53 residues, as facilitated by  
295 MDM2. We thus reasoned that the conformational change induced by RITA might also  
296 abrogate the binding of p53 to MDM4(X).

297

### 298 **RITA inhibits p53/MDM4(X) interaction.**

299 Based on the allosteric shift induced by RITA in p53, we next assessed if RITA inhibits  
300 p53/MDMX complex. We treated HCT 116 colon cancer cells with RITA and assessed  
301 p53/MDMX complex inhibition by co-immunoprecipitation. Our data indicated that RITA  
302 reduced the amount of MDMX bound to p53 by 43% (**Figure 3D**).

303 Next, we employed a yeast-based assay, which measures the p53 transcription activity using

304 as a readout p53-dependent luciferase reporter. Since p53 is not degraded by MDM2 in yeast  
305 cells, the inhibitory effect of MDM2 in this system is solely ascribed to the direct interaction  
306 with p53 and consequent inhibition of p53-dependent transcription (Wang et al. 2001). Co-  
307 transfection of MDM2 with p53 inhibited the p53-dependent reporter (**Figure 3E**). Notably,  
308 RITA rescued wtp53-mediated transactivation of the reporter in the presence of MDM2.  
309 Next, RITA protected p53 from the inhibition by MDMX as reflected by the restoration of  
310 p53-dependent luciferase reporter in the presence of MDMX (**Figure 3E**).  
311 Taken together, our results demonstrated that the allosteric effects exerted by RITA result in  
312 the inhibition of both p53/MDM2 and p53/MDM4(X) interactions.

313

#### 314 **Terminal hydroxyl groups of RITA are crucial for RITA/p53 interaction.**

315 Our model (**Figure 3**) implies that the central furan ring of RITA is not relevant for the  
316 binding with p53. Indeed, an analogue of RITA with the substitution of furan oxygen atom to  
317 sulphur (LCTA-2081, compound 2, see Supplementary Table 1 for structure) had comparable  
318 p53-dependent activity in HCT 116 cells in terms of reduction of cell viability (**Figure 4A**).  
319 Further analysis of RITA analogues (Supplementary Table 1) showed that the presence of  
320 three rings is required for its p53-dependent biological activity. The molecular modelling  
321 predicts that one or two terminal hydroxyl groups are the key for the interaction with p53.  
322 This prediction was supported by the loss of biological activity of RITA analogue NSC-  
323 650973 (compound 4 (cpd4), Supplementary Table 1), lacking both hydroxyl groups (**Figure**  
324 **4A**) and the inability of cpd 4 to compete with [<sup>14</sup>C]-RITA for the binding to p53 (**Figure**  
325 **4B**).

326 We confirmed the biological relevance of two terminal hydroxyl groups of RITA using *in situ*  
327 proximity ligation assay (isPLA) and measured the degree of inhibition of p53/MDM2  
328 complexes in cancer cells (**Figure 4C**) (Söderberg et al., 2006; Castell et al., 2018). isPLA

329 allows for detection of the interaction between proteins in cells using antibodies tagged to  
330 oligos. Treatment of MCF7 or U2OS cells with RITA decreased the average number of  
331 p53/MDM2 isPLA nuclei signals (from 44 +/- 9.25 to 26.5 +/- 6.45 in MCF7 cells and from  
332 58.32 +/- 14 to 25.52 +/- 7.74 in U2OS cells when compared with DMSO) (**Figure 4D**).  
333 Unlike RITA, compound 4 did not decrease the average number of nuclei signals, indicating  
334 that it does not inhibit p53/MDM2 interaction (**Figure 4D**, upper panel). In line with these  
335 data, compound 4 did not induce p53 accumulation (**Figure 4D**, lower panel). Notably,  
336 compound 3, lacking one hydroxyl group (**Supplementary Table 1, Supplementary Figure**  
337 **S2B**) was more efficient in suppressing the growth of HCT 116 cells than compound 4 (NSC-  
338 650973), but still less potent than RITA (**Figure 4A** and (Issaeva et al., 2004)). Thus, we  
339 conclude that both terminal hydroxyl groups of RITA and three thiofuran rings are required  
340 for the efficient binding to p53. The ability to bind p53 correlates with the prevention of  
341 p53/MDM2 binding, induction of p53 and p53-dependent growth suppression.

342

343 **Serine 33 and serine 37 are critical for RITA/p53 interaction, p53 stabilisation and**  
344 **transcription activity.**

345 To further validate our model, which predicted serines 33 and 37 as RITA binding sites, we  
346 generated single and double mutant p53 proteins in which serine 33 and 37 (S33; S37) were  
347 exchanged to alanines. Next, we evaluated the binding of RITA to single and double mutants  
348 using small-molecule band-shift assay. In line with our model, the interaction of mutant p53  
349 peptides with RITA was decreased (**Figure 5A**).

350

351 Sequence alignment of human p53 reference protein sequence (NP\_001119584.1) with  
352 murine p53 protein (NP\_035770.2) showed that p53 from *Mus musculus* lacks residues  
353 corresponding to serine 33 and proline 34 (**Figure 5B**). RITA binds weakly to mouse

354 Np53(1-64) and Np53(1-85) peptides, compared to human p53 (**Figure 5C**), suggesting that  
355 the presence of S33 and P34 is important for RITA binding. Scintillation Proximity Assay  
356 (SPA), which detects the radioactively labelled RITA only when in a very close proximity to  
357 protein coated beads showed that the binding of [<sup>14</sup>C]-RITA to mouse p53 and Np(33/37)  
358 mutant is inefficient in comparison with human N-terminal peptide (**Figure 5D**).

359 In contrast to nutlin, which blocked the p53/MDM2 complex and induced p53 accumulation  
360 in mouse cells, RITA did not disrupt mouse p53/MDM2 interaction and did not induce p53 in  
361 mouse tumor cells and mouse embryonic fibroblasts (MEFs) expressing Ras and c-Myc  
362 oncogenes (**Figure 5E** and **5F**). Nutlin but not RITA activated p53 beta-gal reporter in T22  
363 mouse fibroblasts (Supplementary Figure S3). These data are consistent with our previous  
364 results demonstrating the absence of growth suppression by RITA in mouse tumor cell lines  
365 (Issaeva et al., 2004).

366 Notably, swapping mouse p53 to human p53 in mouse embryo fibroblasts (SWAP MEF)  
367 derived from transgenic mice expressing human p53 in mouse p53-null background  
368 (Dudgeon et al., 2006) restored the ability of RITA to reactivate p53. RITA induced p53 in  
369 SWAP MEF's expressing c-Myc and Ras (**Figure 5G**). It did not affect the viability of  
370 SWAP cells without Ras and Myc overexpression, which is in line with our previous data  
371 suggesting that oncogene activation is required for RITA-mediated induction of p53 (Issaeva  
372 et al., 2004; Grinkevich et al., 2009). Taken together, these data suggest that S33 within  
373 SPLPS motif is required for RITA binding to p53.

374

375 Next, we compared the ability of RITA to rescue the transcriptional activity of p53 and  
376 S33A/S37A mutant from MDM2 using yeast-based reporter assay. Both nutlin and RITA  
377 prevented MDM2-mediated inhibition of p53 activity (**Figure 6A**). However, RITA did not  
378 rescue from MDM2 the transcriptional activity of p53(33/37), while nutlin protected both wt

379 and p53(33/37) from inhibition by MDM2 (*t*-student;  $p < 0.05$ ) (**Figure 6A**). These data  
380 support the notion that S33 and S37 play an important role in RITA-mediated inhibition of  
381 p53/MDM2 interaction.

382

383 To assess if serine residues are important for the induction of p53 in human cells by RITA,  
384 we overexpressed S33/S37 p53 and wtp53 in colon carcinoma RKO *TP53*<sup>-/-</sup> cancer cells.  
385 Nutlin induced the accumulation of wt and p53(33/37) with similar efficiency (**Figure 6B**  
386 and not shown). In contrast, the induction of the double serine mutant by RITA was impaired  
387 (**Figure 6B** and not shown).

388

389 CD spectroscopy confirmed our previously published data (Dickinson et al. 2015) that RITA  
390 increases the content of the secondary structure in Np53 (**Figure 6C**, left panel). Thus, RITA  
391 binds to S33, S37 and induces a conformational change in p53 that inhibits p53/MDM2  
392 complex and induces p53 stabilisation (**Figure 6C**, left panel). To elucidate the role of serine  
393 33 and 37 in RITA-mediated increase of the secondary structure in Np53, we incubated  
394 wtNp53 and Np53(33/37) with the excess of RITA (1:2 ratio) and performed CD  
395 measurements. As shown in **Figure 6C**, (right panel), RITA did not increase the secondary  
396 structure content in Np53(33/37) when compared to wtNp53. The induction of the allosteric  
397 shift in wtNp53 and in Np53(33/37) by RITA was next analyzed by ion mobility mass  
398 spectrometry (IM-MS) that was described by us previously (Jurneczko et al., 2013; Dickinson  
399 et al., 2015). Briefly, we first incubated both wt and Np53(33/37) in the presence or absence  
400 of RITA (Supplemental Experimental procedures). The wtNp53 after incubation with RITA  
401 presents as ions of the form  $[M+zH]^{z+}$  where  $4 \leq z \leq 10$  with charge states  $5 \leq z \leq 8$  at  
402 significant intensity (**Figure 6D**, upper panel). The mass spectra for Np53 without RITA,  
403 with RITA and the control spectra show no mass shift, suggesting that RITA binding is lost



404 during desolvation (Supplementary Figure S4A). Thus, RITA changed the conformation of  
405 Np53 as described previously (Dickinson et al., 2015). The collision cross section  
406 distributions in **Figure 6D**, show that in the absence of RITA, Np53 presents in two distinct  
407 conformational families centered at  $\sim 1500$  and  $\sim 1750 \text{ \AA}^2$ . After incubation with RITA the  
408 more extended conformer is lost, the conformer at  $\sim 1500 \text{ \AA}^2$  remains present at a lowered  
409 intensity and a third conformational family centered on  $\sim 1000 \text{ \AA}^2$  appeared, suggesting a  
410 significant compaction of the Np53 protein. Control experiments confirmed that this  
411 conformer was present only after incubation with RITA (Supplementary Figure S4A). This  
412 trend was observed for all sampled charge states (Supplementary Figure S5A) with small  
413 variations in conformer intensity attributable to coulombic repulsion upon desolvation. Thus,  
414 RITA induces a unique compact conformer (or closely related conformational family) in  
415 wtNp53. In contrast, no gross conformation change was detected in mutant Np53(33/37) after  
416 incubation with RITA (**Figure 6D**, bottom panel and Supplementary Figure S4B, S5B).  
417 Np53(33/37) was present in two conformations centered at  $\sim 1100$  and  $1500 \text{ \AA}^2$  both in the  
418 absence and presence of RITA.

419 In summary, using a number of experimental approaches, we identify p53 residues S33 and  
420 S37 crucial for the interaction with RITA and the allosteric activation of p53.

421

#### 422 **PpIX is an allosteric activator of p53.**

423 Next, we assessed whether the allosteric mechanism of p53 activation identified by us applies  
424 to other inhibitors of p53/MDM2 interactions. Through drug repurposing approach, we have  
425 previously shown that small molecule protoporphyrin IX (PpIX), a drug approved to treat  
426 actinic keratosis, binds to the p53 N-terminus and disrupts p53/MDM2 and p53/MDMX  
427 complexes (Zawacka-Pankau et al., 2007; Sznarkowska et al., 2011; Jiang et al., 2019). Here,  
428 we tested if PpIX targets the same amino acid residues in p53 as RITA, using fluorescent-

429 based small-molecule band shift assay. Fluorescent band shift assay indicates that substitution  
430 of serine 33 to alanine or double substitution at serine 33 and serine 37 decreases the binding  
431 of PpIX to the p53 N-terminus (**Supplementary Figure S6**).

432

433 Taken together, our findings implicate the conformational state of the SPLPS sequence distal  
434 from the MDM2-interacting residues as a key structural element regulating p53/MDM2  
435 interaction as presented in model in **Figure 6E**.

436

437 We propose that this site could be modulated by small molecules such as RITA and PpIX to  
438 reactivate p53 for improved cancer therapy.

439

#### 440 **Discussion**

441

442 Reconstitution of the p53 tumor suppressor has proven to induce regression of highly  
443 malignant lesions (Junttila et al., 2010) and several compounds targeting the p53/MDM2  
444 interaction *via* steric hindrance are currently undergoing clinical trials (Jiang and Zawacka-  
445 Pankau, 2020). Yet, unexpected toxicities observed in clinical studies demand the  
446 identification of novel compounds with a distinct mode of action.

447

448 RITA reactivates wild-type p53 and inhibits p53/MDM2 interaction, however, it is unique  
449 among known p53/MDM2 inhibitors because it binds to p53 (Issaeva et al., 2004; Dickinson  
450 et al., 2015). Even though RITA has been reported to display p53-independent functions  
451 (Wanzel et al., 2016; Peugot et al., 2020), it is a valuable tool to explore the mechanism of  
452 wild type p53 reactivation.

453

454 The gel shift assays employed by us demonstrated that RITA binds to p53 in cells and *in*  
455 *vitro*. Mutation analysis and molecular modelling identified S33 and S37 as critical residues  
456 responsible for RITA binding to Np53. Importantly, the binding of RITA inhibits both  
457 p53/MDM2 and p53/MDMX interactions (**Figure 1 & Figure 2, 3**).

458 Molecular dynamic simulations showed that residues 32-37, responsible for RITA binding,  
459 might be involved in the stabilization of a conformational state in which MDM2-contacting  
460 residues F<sup>19</sup>, W<sup>23</sup> and L<sup>26</sup> of p53 are tucked inside the molecule. Since X-ray structure of the  
461 MDM2 in complex with short p53 peptide (1YCQ.pdb) suggests that residues F<sup>19</sup>, W<sup>23</sup> and  
462 L<sup>26</sup> should be facing out in order to bind MDM2, as shown in **Figure 3C**, thus the binding of  
463 p53 to MDM2 requires conformational changes. More recent study revealed that segments  
464 23-31 and 31-53 of the p53 N-terminus are involved in long-range interactions and can affect  
465 p53's structural flexibility upon MDM2 binding or phosphorylation of residues S33, S46 and  
466 T81. In particular, non-random structural fluctuations at 31-53 segment are affected by  
467 MDM2 binding (Lum et al., 2012). These data provide important evidence supporting our  
468 idea that restricting conformational mobility of segment involving residues 33-37 might serve  
469 to prevent the p53/MDM2 interaction.

470 Our previously published data with ion-mobility mass spectrometry (IM-MS) (Dickinson et  
471 al., 2015) and molecular modelling (**Figure 2**) implies that RITA binds weakly to p53 and  
472 induces allosteric shift in Np53. Modulation of protein conformation by a weak binding  
473 ligand has previously been shown by IM-MS (Harvey et al., 2012). Since IM-MS detects the  
474 changes in p53 conformation induced by a single point mutations (Jurneczko et al., 2013),  
475 analogous to the structural changes in Np53 induced by RITA as detected by IM-MS, we  
476 analyzed the conformer states of the double mutant Np53(33/37) (**Figure 6**). The substitution  
477 of S33 and S37 to alanines and incubation with RITA do not significantly affect mutant Np53  
478 conformers when compared to wt Np53. We confirmed that the finding that RITA does not

479 change the conformation of the double mutant Np53(33/37) using CD spectroscopy. Next,  
480 RITA inhibited p53/MDM2 and p53/MDMX complexes in yeast-based reporter and in cancer  
481 cells (**Figure 2 & 3 & 4**). Yet, the MDM2 and MDMX complexes with double mutant  
482 Np53(33/37) were only inhibited by nutlin but not by RITA. Thus, S33 and S37 are crucial  
483 for allosteric shift in Np53 induced by RITA.

484 Sequence alignment analysis showed that murine p53 lacks S33 and P34. Functional analysis  
485 revealed that RITA does not bind to mouse Np53 *in vitro* and does not reactivate wt p53 in  
486 murine cancer cells (**Figure 5**), which further supports the significance of S33 and S37 in p53  
487 reactivation by RITA.

488 Next, using drug repurposing, we found that PpIX, which we have shown to bind to p53 and  
489 to disrupt p53/MDM2 and p53/MDMX interaction (Jiang et al., 2019), also requires serine 33  
490 and 37 for p53 reactivation.

491

492 Allosteric mechanism of p53 reactivation by RITA and PpIX is a novel and promising turn in  
493 the development of inhibitors of p53/MDM2 interaction. Recent studies showed that  
494 epigallocatechin-3-gallate (EGCG) binds to ITD Np53, inhibits p53/MDM2 interactions and  
495 reactivates p53 by preventing proteasomal degradation (Zhao et al., 2021) highlighting the  
496 relevance of our discovery.

497

498 **Figure 6E** illustrates a scenario suggested by us, in which p53 exists in a range of  
499 conformational states, that are present in cells in a dynamic equilibrium. Close proximity to  
500 MDM2 induces F<sup>19</sup>, W<sup>23</sup> and L<sup>26</sup> to be exposed and to fit into the p53-binding cleft of  
501 MDM2, causing the equilibrium to shift in favour of this conformation. Binding of RITA and  
502 PpIX to SPLPS stabilizes the alternative conformation, in which MDM2-contacting residues  
503 are trapped inside. In this way, the binding of RITA and PpIX to p53 shifts the balance

504 towards the p53 conformer with low affinity to MDM2 and likely to MDMX.

505

506 In summary, our data establish that the allosteric mechanism of inhibition of p53/MDM2 and  
507 p53/MDMX interaction by small molecules could be a viable strategy for the development of  
508 p53-reactivating therapies with the mode of action different from MDM2i. The identified  
509 structural elements in p53 and RITA may provide a basis for the generation of novel  
510 allosteric activators of p53, which might be translated into the clinical practice in a future.

511

### 512 **Supplemental information**

513 Supplemental information includes Supplemental Experimental Procedures, Supplemental  
514 References, six supplemental figures and one table.

515

### 516 **Acknowledgements**

517 This work was supported by grants to G.S. from the Swedish Research Council, the Swedish  
518 Cancer Society and Ragnar Söderberg Foundation. ALO was funded by BBSRC UK. J. E. Z-  
519 P would like to acknowledge the grant from Karolinska Institute, Stockholms Läns  
520 Landsting, the Strategic Research Program in Cancer Karolinska Institute, Åke Wibergs  
521 Stiftelse and Cathrine Everts forskningsstiftelse. J. E. Z-P would like to address special thanks  
522 to Klas Wiman from Karolinska Institute for his support and outstanding mentorship. We are  
523 greatly indebted to Protein Science Facility Karolinska Institutet for protein purification and  
524 to all our colleagues who shared with us their reagents and cell lines. The authors are grateful  
525 to Yari Ciribilli, Bartosz Ferens, Anna Kostecka and Alicja Sznarkowska for helpful  
526 discussions and technical assistance.

527

528

529

530 **Authors contribution**

531 Conceptualisation: G. Selivanova; J. E. Zawacka-Pankau; A.L. Okorokov

532 Methodology and data analysis: G. Selivanova; J. E. Zawacka-Pankau; A.L. Okorokov; V.V.

533 Grinkevich; N. Issaeva; P.E. Barran; A. Inga; LG. Larsson; A. Karlen

534 Investigation: J.E. Zawacka-Pankau, V.V. Grinkevich, A.Vema, K. Fawkner, N. Issaeva, V.

535 Andreotti, A. Inga, E.R. Dickinson, E. Hedström, C. Spinnler, M.Wilhelm

536 Writing draft: J. E. Zawacka-Pankau, A.L. Okorokov, A. Inga, P.E. Barran, G. Selivanova

537 Writing review and editing: J. E. Zawacka-Pankau, G. Selivanova;

538 Supervision: G. Selivanova and J. E. Zawacka-Pankau.

539

540 **Declaration of interests**

541 The authors declare no conflict of interests.

542

543

544

545

546

547

548

549

550

551

552

553

554

555 **Figure legends**

556 **Figure 1. RITA binds to p53 in cancer cells and *in vitro*.**

557 **A.** [<sup>14</sup>C]-RITA/protein complexes were analyzed in cancer cells treated with 5 μM [<sup>14</sup>C]-  
558 RITA for 12h to enable sufficient accumulation of RITA. Cell lysates of HCT 116 or  
559 HCT 116 *TP53*<sup>-/-</sup> cells were separated in 10% SDS-PAGE under mild denaturing  
560 conditions (snap denaturation). The position of [<sup>14</sup>C]-RITA was visualized by  
561 autoradiography. p53 was detected by immunoblotting before and after immunodepletion  
562 with DO-1 antibody (right panel). Shown is a representative data of three independent  
563 experiments.

564 **B.** A small-molecule band shift assay in gradient polyacrylamide gel run under non-  
565 denaturing conditions in TBE gel showed that [<sup>14</sup>C]-RITA binds to p53 in HCT 116  
566 cells. [<sup>14</sup>C]-RITA and p53 were detected as in figure A.

567 **C.** [<sup>14</sup>C]-RITA binds to GST-Np53(2-65) fusion protein, and human serum albumin (HSA)  
568 but not to fibrinogen as detected by a small-molecule band shift assay in TBE gel using  
569 2:1 molar excess of RITA. Dotted line indicates where the gel was cut.

570 **D.** Upon standard denaturing conditions [<sup>14</sup>C]-RITA/p53 and [<sup>14</sup>C]-RITA/HSA complexes  
571 are disrupted.

572

573 **Figure 2. RITA binding site is located between residues 25 - 28 of the human p53 N-**  
574 **terminus.**

575 **A.** Scheme depicting the series of deletion mutants generated to map RITA binding site.

576 **B.** [<sup>14</sup>C]-RITA only binds to p53 N terminus deletion mutants containing residues 25-38.  
577 Band density was measured using ImageJ software and normalized to GST-tag.

578

579 **Figure 3. Molecular modelling shows that RITA binds to S33 and S37, induces allosteric**  
580 **shift in Np53 and inhibits p53/MDM2 and p53/MDM4 interactions.**

581 **A.** Binding of RITA to SPLPS sequence (cyan) of p53 involves interaction with S33 and S37  
582 via terminal hydroxyl groups of RITA, and hydrophobic interactions with P34 and P36.  
583 Hydrogen bonds are highlighted in black dotted lines. Orientation of the MDM2-binding  
584 helix of p53 (*lime*) is different upon p53 binding to RITA (blue) **B.** and to MDM2 (*purple*)  
585 (pdb: 1YCQ) (**C**). Side chains of residues (F<sup>19</sup>, W<sup>23</sup> and L<sup>26</sup>) involved in MDM2 binding  
586 are shown in (**B**, **C**). Atom type colouring; oxygen (*red*), nitrogen (*blue*), and sulphur  
587 (*yellow*). See also Movie S1.

588 **D.** In line with the model prediction, RITA-induced p53 conformational change results in the  
589 inhibition of p53/MDM2 and p53/MDMX binding in HCT 116 cells as assessed by co-  
590 immunoprecipitation. Dotted line indicates the site where the membrane was exposed at  
591 different exposure time.

592 **E.** RITA rescues the p53 transcription activity from inhibition by MDM2 or MDMX as  
593 assessed by yeast-based functional assay. The average light units relative to the  
594 transactivation activity of p53 alone and the standard errors of at least five biological  
595 repeats are presented. The *t*-student test was performed for statistical analysis with  $p \leq$   
596 0.05.

597

598

599

600

601

602

603



604

605

606 **Figure 4. Two terminal hydroxyl groups of RITA are crucial for the binding to p53 and**

607 **the inhibition of the p53/MDM2 interaction.**

608 **A.** RITA analogue NSC-650973 (compound 4) lacking two hydroxyl groups does not  
609 inhibit the growth of HCT 116 cancer cells, unlike LCTA-2081 (compound 2) analogue  
610 with substituted O atom in furan ring (for structure refer to Supplementary Table 1),  
611 which retained full biological activity. NSC-672170 (compound 3) analogue with one  
612 hydroxyl group substituted to ketone retained approximately 60% of RITA biological  
613 activity.

614 **B.** Compound 4 (40, 80 and 100  $\mu$ M) does not compete for the binding to Np53 with [ $^{14}$ C]-  
615 RITA.

616 **C.** p53/MDM2 complexes (fluorescent foci) in MCF7 and U2OS cells treated or non-treated  
617 with RITA as detected by *in situ* Proximity Ligation Assay (isPLA). The p53-null H1299  
618 and U2OS cells stained without secondary antibody were used as the assay controls.

619 **D.** Quantitative isPLA demonstrated the decrease in the average number of nuclear signals  
620 by RITA, but not by its derivative NSC-650973 (cpd 4) (upper panel). The normality was  
621 assessed with Shapiro-Wilk's test.  $p < 0.05$  values were considered statistically  
622 significant. RITA, but not compound 4 induced p53 accumulation in HCT116 cells, as  
623 detected by western blot (lower panel).

624

625

626

627

628

629

630

631 **Figure 5. Serine 33 and serine 37 are crucial for the binding of RITA to the p53 N-**  
632 **terminus.**

633 **A.** Assessment of [<sup>14</sup>C]-RITA interaction with Np53 proteins carrying alanine substitutions  
634 of S33 or S33/S37 using band shift assay. Np53(S33/S37) does not bind to [<sup>14</sup>C]-RITA *in*  
635 *vitro* when compared to wtNp53. Bands' densities were quantified using ImageJ software  
636 and normalized to GST-tag.

637 **B.** Alignment of murine and human p53 N-termini. Highlighted are the sites for MDM2  
638 interaction and the RITA-binding motif.

639 **C. D.** RITA does not bind to mouse Np53 proteins, spanning residues 1-64 and 1-85 as  
640 detected by band shift assay and scintillation proximity assay (SPA). Np53(33/37) was  
641 used as a negative binding control in SPA assay.

642 **D. E.** Co-immunoprecipitation showed that RITA does not prevent p53/MDM2 interaction  
643 in TA3-Sth mouse cancer cells. C - control untreated sample, R - RITA-treated, N -  
644 nutlin-treated samples; dotted line represents different exposure time of this part of the  
645 membrane.

646 **F.** Mouse p53 in Myc- and Ras-transformed MEF's is not induced by RITA (R) in contrast  
647 to nutlin (N).

648 **G.** RITA induces human p53 in SWAP MEF's transfected with Ras and c-Myc as detected  
649 by western blot.

650

651

652

653

654

655 **Figure 6. Serine 33 and serine 37 are required for RITA-induced rescue of p53 from**  
656 **inhibition by MDM2.**

657 **A.** Co-expression of MDM2 along with wt or mutant p53(33/37) inhibits p53-dependent  
658 luciferase reporter in yeast-based reporter assay. 1  $\mu$ M RITA (R) does not rescue the  
659 reporter driven by mutant p53(33/37). The *t*-student test was performed for statistical  
660 analysis with  $p < 0.05$ . (N) - nutlin

661 **B.** wt p53 and mutant p53(33/37) were overexpressed using lentivirus in RKO *TP53*<sup>-/-</sup> and  
662 SW 48 cancer cells. Wt p53 protein but not mutant p53(33/37) is induced by 1  $\mu$ M RITA  
663 (R) as assessed by western blotting. Band density was assessed using ImageJ software  
664 and normalized to non-treated controls. (N) - nutlin

665 **C.** RITA increases the secondary structure content in wt Np53 (left) but not in mutant  
666 Np53(33/37) (right) as detected by circular dichroism spectroscopy (CD).

667 **D.** nESI mass spectra (left) and drift tube ion mobility mass spectrometry collision cross  
668 section distributions arising from arrival time distributions (right) for the  $[M+6H]^{6+}$   
669 analyte of wt Np53 in the absence and presence of RITA (top panel, and mutant  
670 Np53(33/37) in the absence and presence of RITA (bottom panel). Conformational  
671 families are depicted by coloured Gaussian curves. wtNp53 undergoes a compaction event  
672 resulting in the induction of a novel conformational family shown in red. Mutant  
673 Np53(33/37) conformational spread is unaffected by RITA.

674 **E.** A scheme illustrating allosteric mechanism of RITA-induced inhibition of p53/MDM2  
675 interaction. Binding of RITA shifts the balance towards p53 conformation with low  
676 affinity to MDM2.

677

678

679 **Bibliography**

680

- 681 Belyi, V. A., Ak, P., Markert, E., Wang, H., Hu, W., Puzio-Kuter, A., and Levine, A. J.  
682 (2010). The origins and evolution of the p53 family of genes. *Cold Spring*  
683 *Harb. Perspect. Biol.* 2, a001198. doi:10.1101/cshperspect.a001198.
- 684 Bill, K. L. J., Garnett, J., Meaux, I., Ma, X., Creighton, C. J., Bolshakov, S., Barriere, C.,  
685 Debussche, L., Lazar, A. J., Prudner, B. C., et al. (2016). SAR405838: A novel  
686 and potent inhibitor of the mdm2:p53 axis for the treatment of dedifferentiated  
687 liposarcoma. *Clin. Cancer Res.* 22, 1150–1160. doi:10.1158/1078-0432.CCR-  
688 15-1522.
- 689 Castell, A., Yan, Q., Fawkner, K., Hydbring, P., Zhang, F., Verschut, V., Franco, M.,  
690 Zakaria, S. M., Bazzar, W., Goodwin, J., et al. (2018). A selective high affinity  
691 MYC-binding compound inhibits MYC:MAX interaction and MYC-dependent  
692 tumor cell proliferation. *Sci. Rep.* 8, 10064. doi:10.1038/s41598-018-28107-4.
- 693 Chivian, D., and Baker, D. (2006). Homology modeling using parametric alignment  
694 ensemble generation with consensus and energy-based model selection. *Nucleic*  
695 *Acids Res.* 34, e112. doi:10.1093/nar/gkl480.
- 696 Dawson, R., Müller, L., Dehner, A., Klein, C., Kessler, H., and Buchner, J. (2003). The N-  
697 terminal domain of p53 is natively unfolded. *J. Mol. Biol.* 332, 1131–1141.  
698 doi:10.1016/j.jmb.2003.08.008.
- 699 Dickinson, E. R., Jurneczko, E., Nicholson, J., Hupp, T. R., Zawacka-Pankau, J., Selivanova,  
700 G., and Barran, P. E. (2015). The use of ion mobility mass spectrometry to  
701 probe modulation of the structure of p53 and of MDM2 by small molecule  
702 inhibitors. *Front. Mol. Biosci.* 2, 39. doi:10.3389/fmolb.2015.00039.
- 703 Dobbelstein, M., and Levine, A. J. (2020). Mdm2: Open questions. *Cancer Sci.* 111, 2203–  
704 2211. doi:10.1111/cas.14433.
- 705 Dudgeon, C., Kek, C., Demidov, O. N., Saito, S., Fernandes, K., Diot, A., Bourdon, J.-C.,  
706 Lane, D. P., Appella, E., Fornace, A. J., et al. (2006). Tumor susceptibility and  
707 apoptosis defect in a mouse strain expressing a human p53 transgene. *Cancer*  
708 *Res.* 66, 2928–2936. doi:10.1158/0008-5472.CAN-05-2063.
- 709 Espinoza-Fonseca, L. M. (2009). Leucine-rich hydrophobic clusters promote folding of the  
710 N-terminus of the intrinsically disordered transactivation domain of p53. *FEBS*  
711 *Lett.* 583, 556–560. doi:10.1016/j.febslet.2008.12.060.
- 712 Grinkevich, V. V., Nikulenkov, F., Shi, Y., Enge, M., Bao, W., Maljukova, A., Gluch, A.,  
713 Kel, A., Sangfelt, O., and Selivanova, G. (2009). Ablation of key oncogenic  
714 pathways by RITA-reactivated p53 is required for efficient apoptosis. *Cancer*  
715 *Cell* 15, 441–453. doi:10.1016/j.ccr.2009.03.021.
- 716 Harvey, S. R., Porrini, M., Stachl, C., MacMillan, D., Zinzalla, G., and Barran, P. E. (2012).  
717 Small-molecule inhibition of c-MYC:MAX leucine zipper formation is revealed  
718 by ion mobility mass spectrometry. *J. Am. Chem. Soc.* 134, 19384–19392.  
719 doi:10.1021/ja306519h.
- 720 Haupt, S., Mejía-Hernández, J. O., Vijayakumaran, R., Keam, S. P., and Haupt, Y. (2019).  
721 The long and the short of it: the MDM4 tail so far. *J. Mol. Cell Biol.* 11, 231–  
722 244. doi:10.1093/jmcb/mjz007.
- 723 Inga, A., Storic, F., Darden, T. A., and Resnick, M. A. (2002). Differential transactivation by  
724 the p53 transcription factor is highly dependent on p53 level and promoter  
725 target sequence. *Mol. Cell. Biol.* 22, 8612–8625. doi:10.1128/MCB.22.24.8612-  
726 8625.2002.
- 727 Issaeva, N., Bozko, P., Enge, M., Protopopova, M., Verhoef, L. G. G. C., Masucci, M.,

- 728 Pramanik, A., and Selivanova, G. (2004). Small molecule RITA binds to p53,  
729 blocks p53-HDM-2 interaction and activates p53 function in tumors. *Nat. Med.*  
730 10, 1321–1328. doi:10.1038/nm1146.
- 731 Jiang, L., Malik, N., Acedo, P., and Zawacka-Pankau, J. (2019). Protoporphyrin IX is a dual  
732 inhibitor of p53/MDM2 and p53/MDM4 interactions and induces apoptosis in  
733 B-cell chronic lymphocytic leukemia cells. *Cell Death Discov.* 5, 77.  
734 doi:10.1038/s41420-019-0157-7.
- 735 Jiang, L., and Zawacka-Pankau, J. (2020). The p53/MDM2/MDMX-targeted therapies-a  
736 clinical synopsis. *Cell Death Dis.* 11, 237. doi:10.1038/s41419-020-2445-9.
- 737 Junttila, M. R., Karnezis, A. N., Garcia, D., Madriles, F., Kortlever, R. M., Rostker, F.,  
738 Brown Swigart, L., Pham, D. M., Seo, Y., Evan, G. I., et al. (2010). Selective  
739 activation of p53-mediated tumour suppression in high-grade tumours. *Nature*  
740 468, 567–571. doi:10.1038/nature09526.
- 741 Jurneczko, E., Cruickshank, F., Porrini, M., Clarke, D. J., Campuzano, I. D. G., Morris, M.,  
742 Nikolova, P. V., and Barran, P. E. (2013). Probing the conformational diversity  
743 of cancer-associated mutations in p53 with ion-mobility mass spectrometry.  
744 *Angew. Chem. Int. Ed. Engl.* 52, 4370–4374. doi:10.1002/anie.201210015.
- 745 Kar, S., Sakaguchi, K., Shimohigashi, Y., Samaddar, S., Banerjee, R., Basu, G.,  
746 Swaminathan, V., Kundu, T. K., and Roy, S. (2002). Effect of phosphorylation  
747 on the structure and fold of transactivation domain of p53. *J. Biol. Chem.* 277,  
748 15579–15585. doi:10.1074/jbc.M106915200.
- 749 Kim, D. E., Chivian, D., and Baker, D. (2004). Protein structure prediction and analysis using  
750 the Robetta server. *Nucleic Acids Res.* 32, W526-31. doi:10.1093/nar/gkh468.
- 751 Kim, D. E., Chivian, D., Malmström, L., and Baker, D. (2005). Automated prediction of  
752 domain boundaries in CASP6 targets using GinzU and RosettaDOM. *Proteins*  
753 61 Suppl 7, 193–200. doi:10.1002/prot.20737.
- 754 Koehler, M. F. T., Zobel, K., Beresini, M. H., Caris, L. D., Combs, D., Paasch, B. D., and  
755 Lazarus, R. A. (2002). Albumin affinity tags increase peptide half-life in vivo.  
756 *Bioorg. Med. Chem. Lett.* 12, 2883–2886. doi:10.1016/s0960-894x(02)00610-8.
- 757 Kratz, C. P., Freycon, C., Maxwell, K. N., Nichols, K. E., Schiffman, J. D., Evans, D. G.,  
758 Achatz, M. I., Savage, S. A., Weitzel, J. N., Garber, J. E., et al. (2021). Analysis  
759 of the Li-Fraumeni Spectrum Based on an International Germline TP53 Variant  
760 Data Set: An International Agency for Research on Cancer TP53 Database  
761 Analysis. *JAMA Oncol.* doi:10.1001/jamaoncol.2021.4398.
- 762 Kussie, P. H., Gorina, S., Marechal, V., Elenbaas, B., Moreau, J., Levine, A. J., and  
763 Pavletich, N. P. (1996). Structure of the MDM2 oncoprotein bound to the p53  
764 tumor suppressor transactivation domain. *Science* 274, 948–953.  
765 doi:10.1126/science.274.5289.948.
- 766 Levine, A. J. (2020). p53: 800 million years of evolution and 40 years of discovery. *Nat. Rev.*  
767 *Cancer* 20, 471–480. doi:10.1038/s41568-020-0262-1.
- 768 Lozano, G., and Levine, A. J. (2016). The p53 protein: from cell regulation to cancer.
- 769 Lum, J. K., Neuweiler, H., and Fersht, A. R. (2012). Long-range modulation of chain motions  
770 within the intrinsically disordered transactivation domain of tumor suppressor  
771 p53. *J. Am. Chem. Soc.* 134, 1617–1622. doi:10.1021/ja2078619.
- 772 Magnusson, K. P., Satalino, R., Qian, W., Klein, G., and Wiman, K. G. (1998). Is conversion  
773 of solid into more anoxic ascites tumors associated with p53 inactivation?  
774 *Oncogene* 17, 2333–2337. doi:10.1038/sj.onc.1202149.
- 775 Marine, J. C., Francoz, S., Maetens, M., Wahl, G., Toledo, F., and Lozano, G. (2006).  
776 Keeping p53 in check: essential and synergistic functions of Mdm2 and Mdm4.  
777 *Cell Death Differ.* 13, 927–934. doi:10.1038/sj.cdd.4401912.

- 778 Mullard, A. (2020). p53 programmes plough on. *Nat. Rev. Drug Discov.* 19, 497–500.  
779 doi:10.1038/d41573-020-00130-z.
- 780 Okorokov, A. L., Sherman, M. B., Plisson, C., Grinkevich, V., Sigmundsson, K., Selivanova,  
781 G., Milner, J., and Orlova, E. V. (2006). The structure of p53 tumour suppressor  
782 protein reveals the basis for its functional plasticity. *EMBO J.* 25, 5191–5200.  
783 doi:10.1038/sj.emboj.7601382.
- 784 Peugot, S., Zhu, J., Sanz, G., Singh, M., Gaetani, M., Chen, X., Shi, Y., Saei, A. A., Visnes,  
785 T., Lindström, M. S., et al. (2020). Thermal Proteome Profiling Identifies  
786 Oxidative-Dependent Inhibition of the Transcription of Major Oncogenes as a  
787 New Therapeutic Mechanism for Select Anticancer Compounds. *Cancer Res.*  
788 80, 1538–1550. doi:10.1158/0008-5472.CAN-19-2069.
- 789 Resnick, M. A., and Inga, A. (2003). Functional mutants of the sequence-specific  
790 transcription factor p53 and implications for master genes of diversity. *Proc.*  
791 *Natl. Acad. Sci. USA* 100, 9934–9939. doi:10.1073/pnas.1633803100.
- 792 Rohl, C. A., Strauss, C. E. M., Chivian, D., and Baker, D. (2004). Modeling structurally  
793 variable regions in homologous proteins with rosetta. *Proteins* 55, 656–677.  
794 doi:10.1002/prot.10629.
- 795 Saleh, M. N., Patel, M. R., Bauer, T. M., Goel, S., Falchook, G. S., Shapiro, G. I., Chung, K.  
796 Y., Infante, J. R., Conry, R. M., Rabinowits, G., et al. (2021). Phase 1 Trial of  
797 ALRN-6924, a Dual Inhibitor of MDMX and MDM2, in Patients with Solid  
798 Tumors and Lymphomas Bearing Wild-Type TP53. *Clin. Cancer Res.*  
799 doi:10.1158/1078-0432.CCR-21-0715.
- 800 Schrödinger, L. L. C. MacroModel, version 9.6. *Schrödinger*.
- 801 Söderberg, O., Gullberg, M., Jarvius, M., Ridderstråle, K., Leuchowius, K.-J., Jarvius, J.,  
802 Wester, K., Hydbring, P., Bahram, F., Larsson, L.-G., et al. (2006). Direct  
803 observation of individual endogenous protein complexes in situ by proximity  
804 ligation. *Nat. Methods* 3, 995–1000. doi:10.1038/nmeth947.
- 805 Spinnler, C., Hedström, E., Li, H., de Lange, J., Nikulenkov, F., Teunisse, A. F. A. S.,  
806 Verlaan-de Vries, M., Grinkevich, V., Jochemsen, A. G., and Selivanova, G.  
807 (2011). Abrogation of Wip1 expression by RITA-activated p53 potentiates  
808 apoptosis induction via activation of ATM and inhibition of HdmX. *Cell Death*  
809 *Differ.* 18, 1736–1745. doi:10.1038/cdd.2011.45.
- 810 Sun, D., Li, Z., Rew, Y., Gribble, M., Bartberger, M. D., Beck, H. P., Canon, J., Chen, A.,  
811 Chen, X., Chow, D., et al. (2014). Discovery of AMG 232, a potent, selective,  
812 and orally bioavailable MDM2-p53 inhibitor in clinical development. *J. Med.*  
813 *Chem.* 57, 1454–1472. doi:10.1021/jm401753e.
- 814 Sznarkowska, A., Maleńczyk, K., Kadziński, L., Bielawski, K. P., Banecki, B., and Zawacka-  
815 Pankau, J. (2011). Targeting of p53 and its homolog p73 by protoporphyrin IX.  
816 *FEBS Lett.* 585, 255–260. doi:10.1016/j.febslet.2010.12.004.
- 817 Toledo, F., and Wahl, G. M. (2007). MDM2 and MDM4: p53 regulators as targets in  
818 anticancer therapy. *Int. J. Biochem. Cell Biol.* 39, 1476–1482.  
819 doi:10.1016/j.biocel.2007.03.022.
- 820 Tomso, D. J., Inga, A., Menendez, D., Pittman, G. S., Campbell, M. R., Storic, F., Bell, D.  
821 A., and Resnick, M. A. (2005). Functionally distinct polymorphic sequences in  
822 the human genome that are targets for p53 transactivation. *Proc. Natl. Acad.*  
823 *Sci. USA* 102, 6431–6436. doi:10.1073/pnas.0501721102.
- 824 Vassilev, L. T., Vu, B. T., Graves, B., Carvajal, D., Podlaski, F., Filipovic, Z., Kong, N.,  
825 Kammlott, U., Lukacs, C., Klein, C., et al. (2004). In vivo activation of the p53  
826 pathway by small-molecule antagonists of MDM2. *Science* 303, 844–848.  
827 doi:10.1126/science.1092472.

- 828 Vousden, K. H., and Prives, C. (2009). Blinded by the Light: The Growing Complexity of  
829 p53. *Cell* 137, 413–431. doi:10.1016/j.cell.2009.04.037.
- 830 Wanzel, M., Vischedyk, J. B., Gittler, M. P., Gremke, N., Seiz, J. R., Hefter, M., Noack, M.,  
831 Savai, R., Mernberger, M., Charles, J. P., et al. (2016). CRISPR-Cas9-based  
832 target validation for p53-reactivating model compounds. *Nat. Chem. Biol.* 12,  
833 22–28. doi:10.1038/nchembio.1965.
- 834 Wells, M., Tidow, H., Rutherford, T. J., Markwick, P., Jensen, M. R., Mylonas, E., Svergun,  
835 D. I., Blackledge, M., and Fersht, A. R. (2008). Structure of tumor suppressor  
836 p53 and its intrinsically disordered N-terminal transactivation domain. *Proc.*  
837 *Natl. Acad. Sci. USA* 105, 5762–5767. doi:10.1073/pnas.0801353105.
- 838 Zawacka-Pankau, J., Issaeva, N., Hossain, S., Pramanik, A., Selivanova, G., and Podhajska,  
839 A. J. (2007). Protoporphyrin IX interacts with wild-type p53 protein in vitro and  
840 induces cell death of human colon cancer cells in a p53-dependent and -  
841 independent manner. *J. Biol. Chem.* 282, 2466–2472.  
842 doi:10.1074/jbc.M608906200.
- 843 Zhao, J., Blayney, A., Liu, X., Gandy, L., Jin, W., Yan, L., Ha, J.-H., Canning, A. J.,  
844 Connelly, M., Yang, C., et al. (2021). EGCG binds intrinsically disordered N-  
845 terminal domain of p53 and disrupts p53-MDM2 interaction. *Nat. Commun.* 12,  
846 986. doi:10.1038/s41467-021-21258-5.
- 847

**A.**

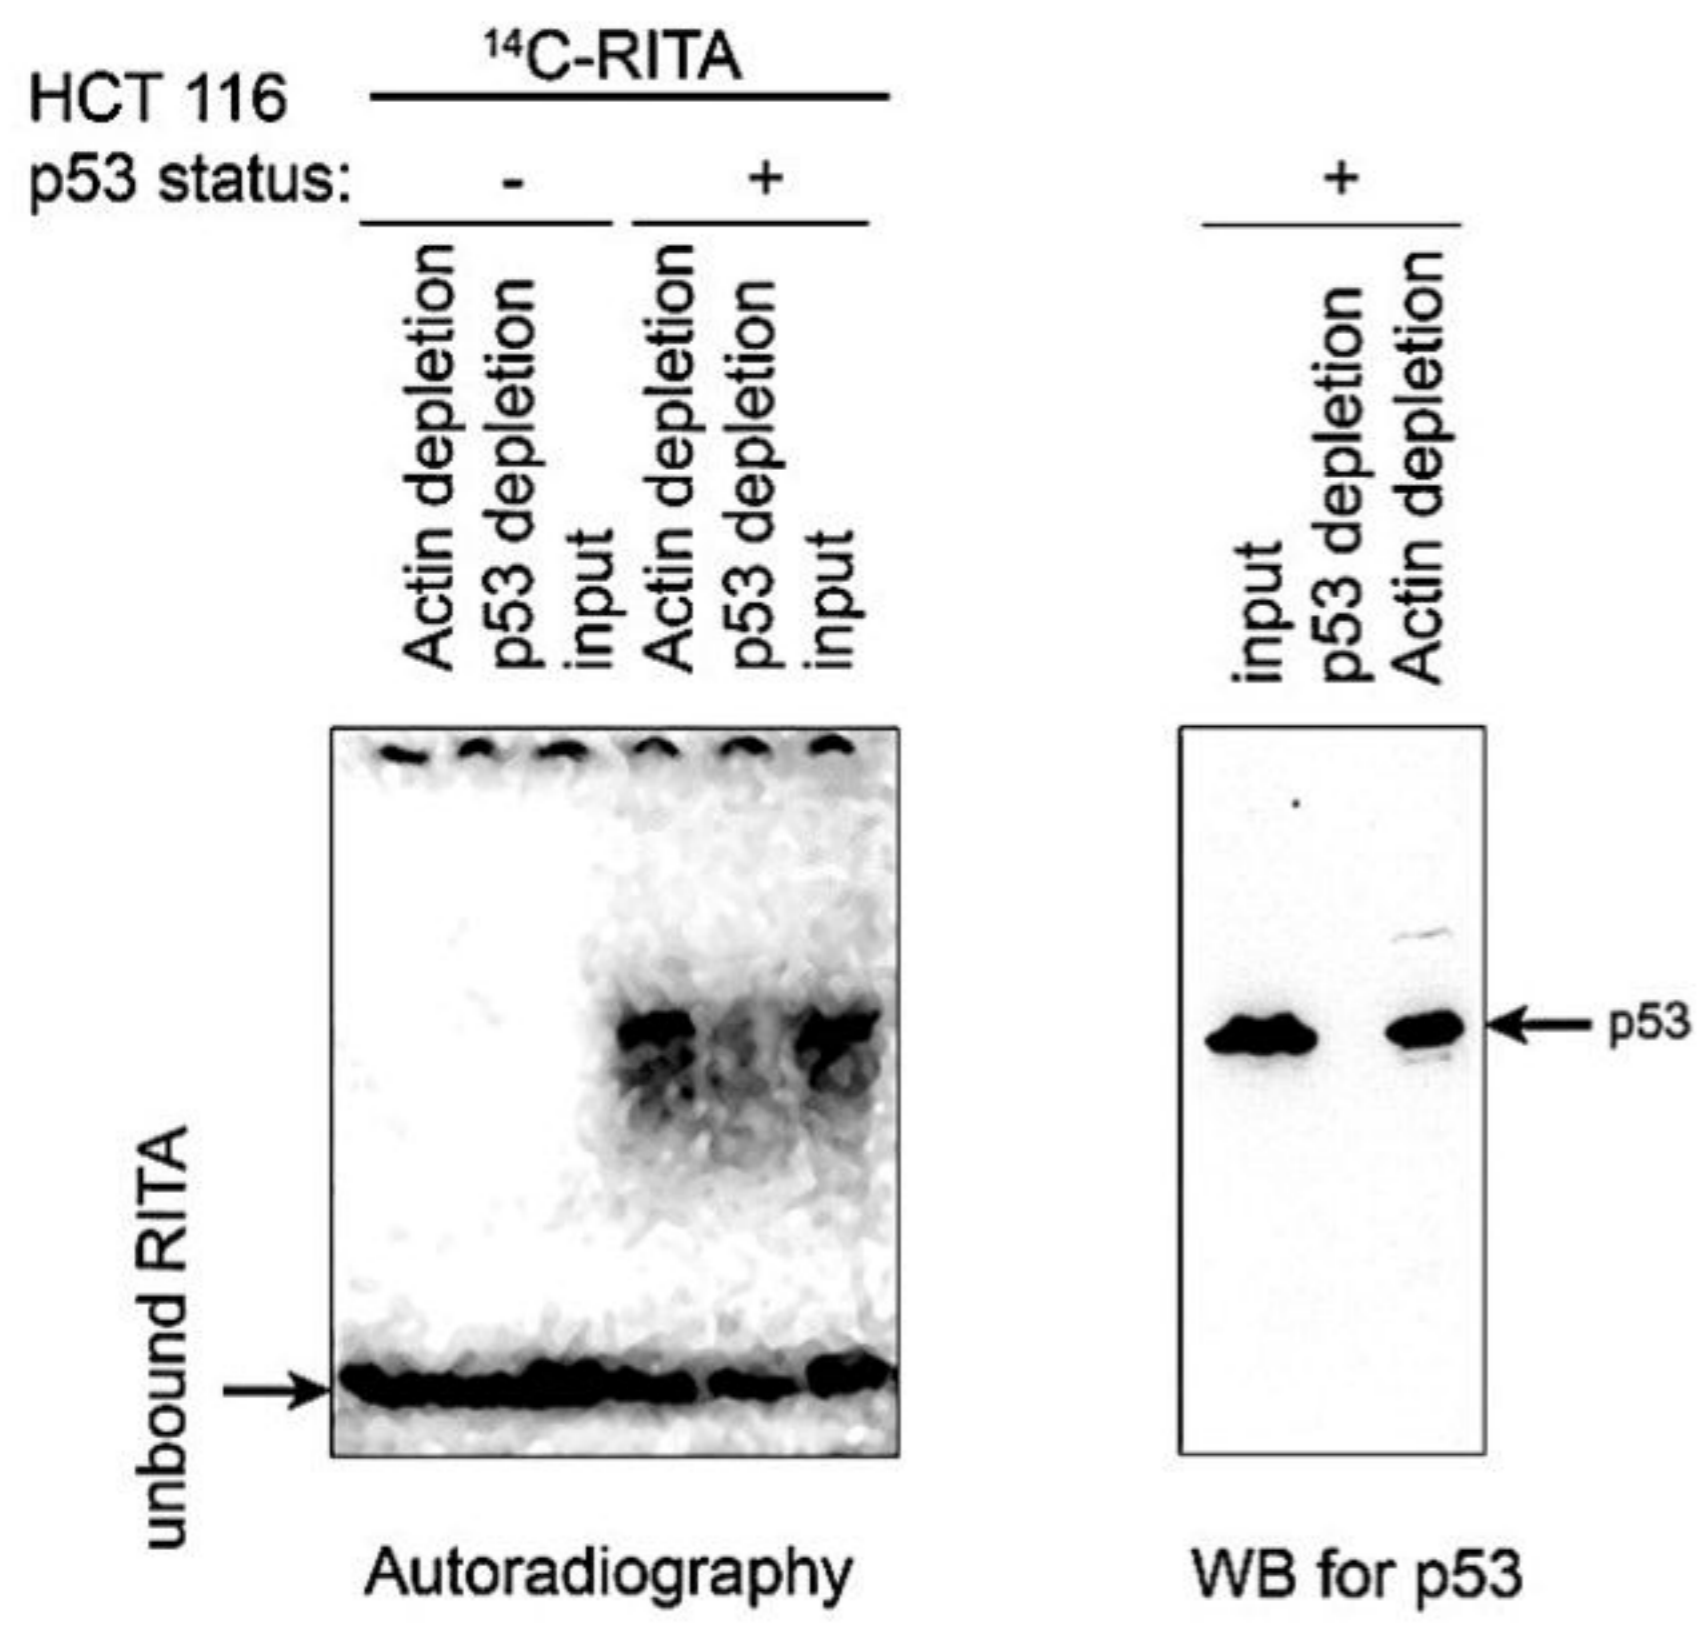

**B.**

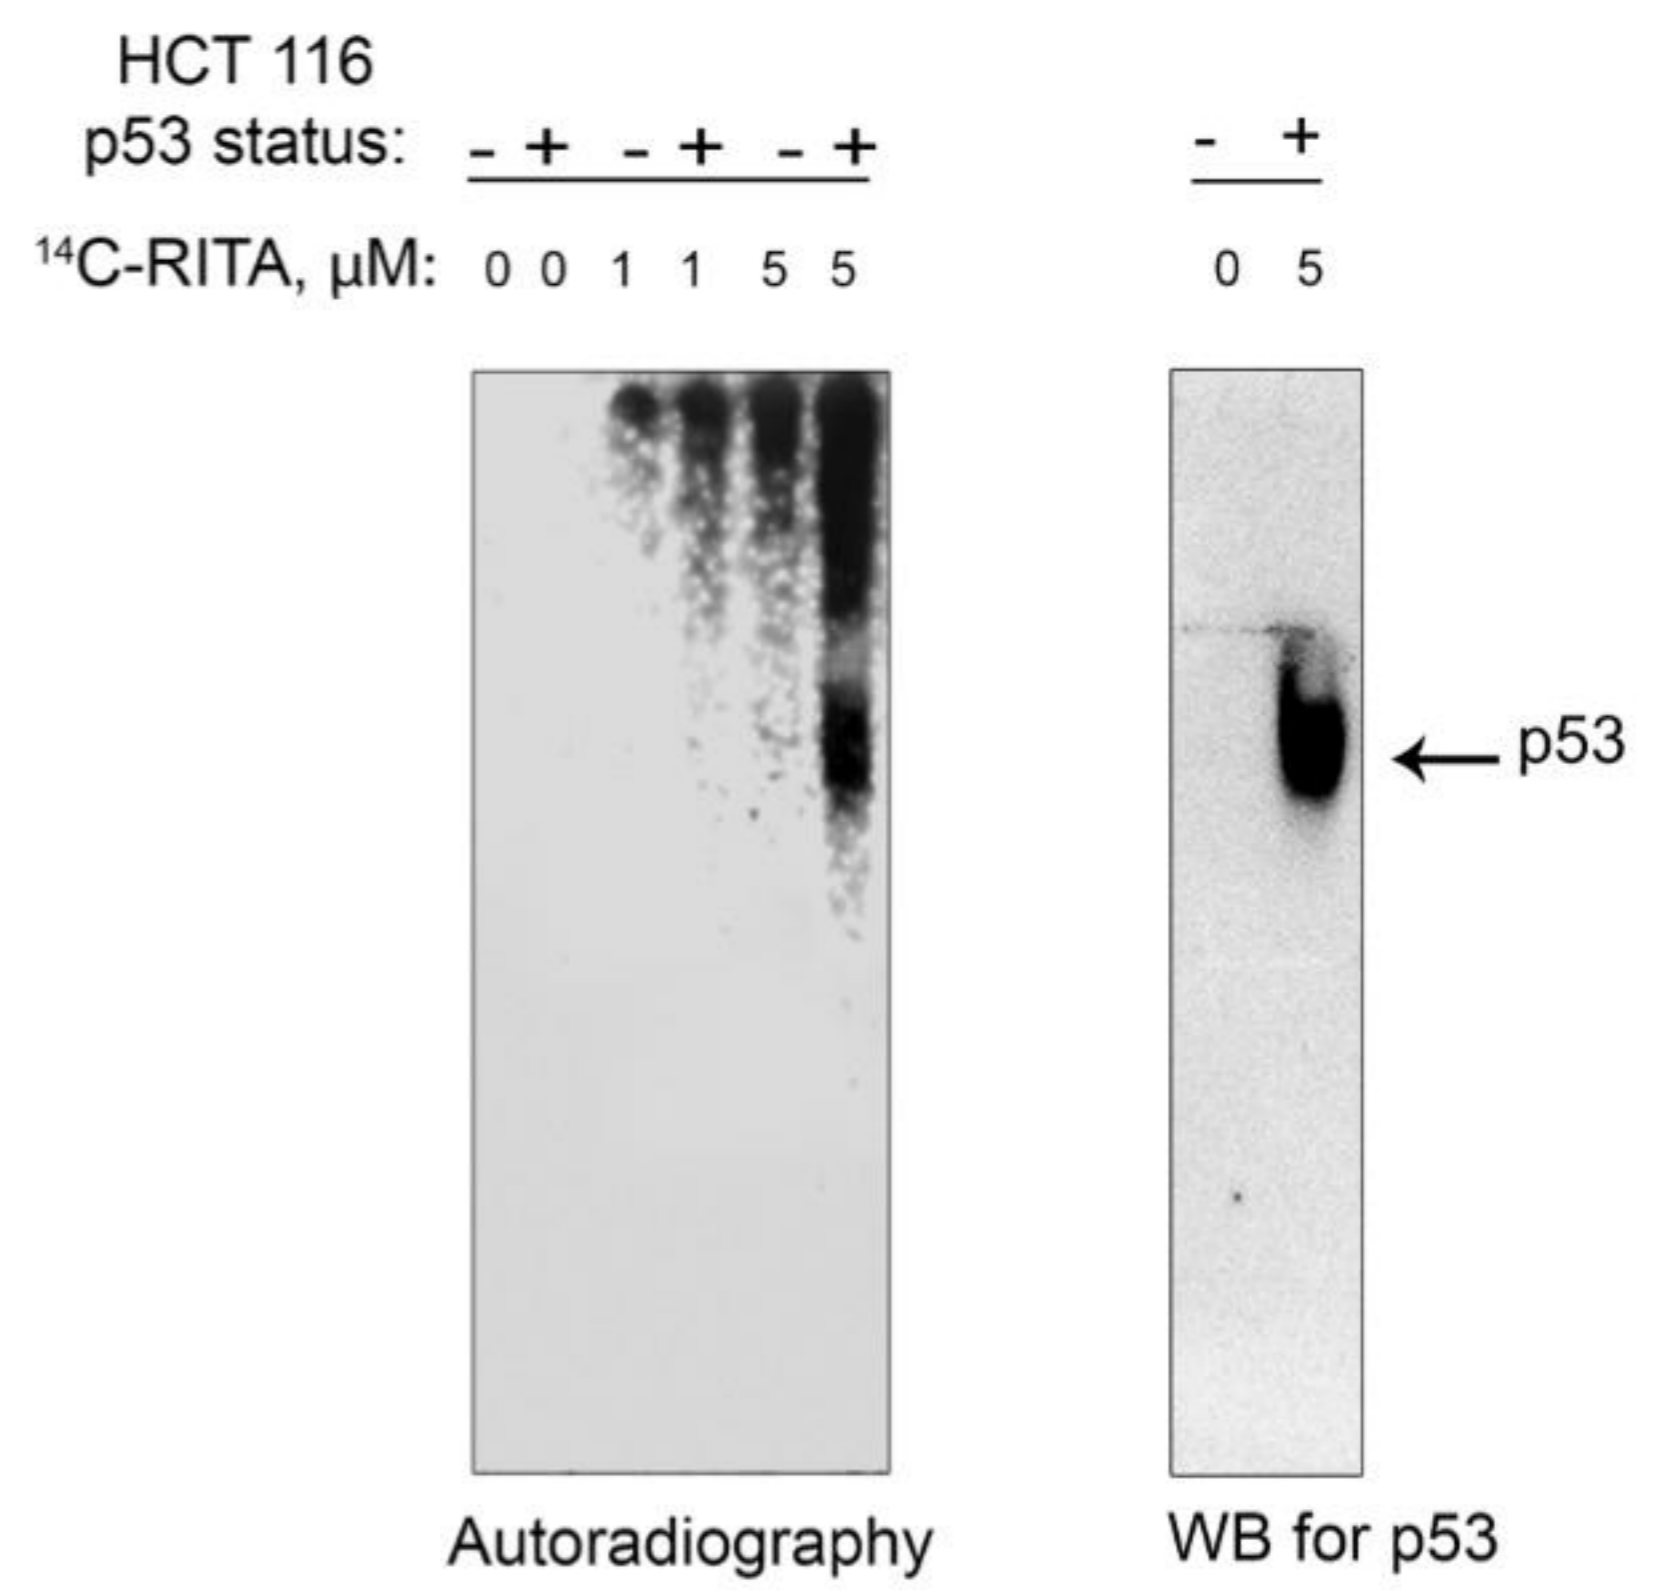

**C.**

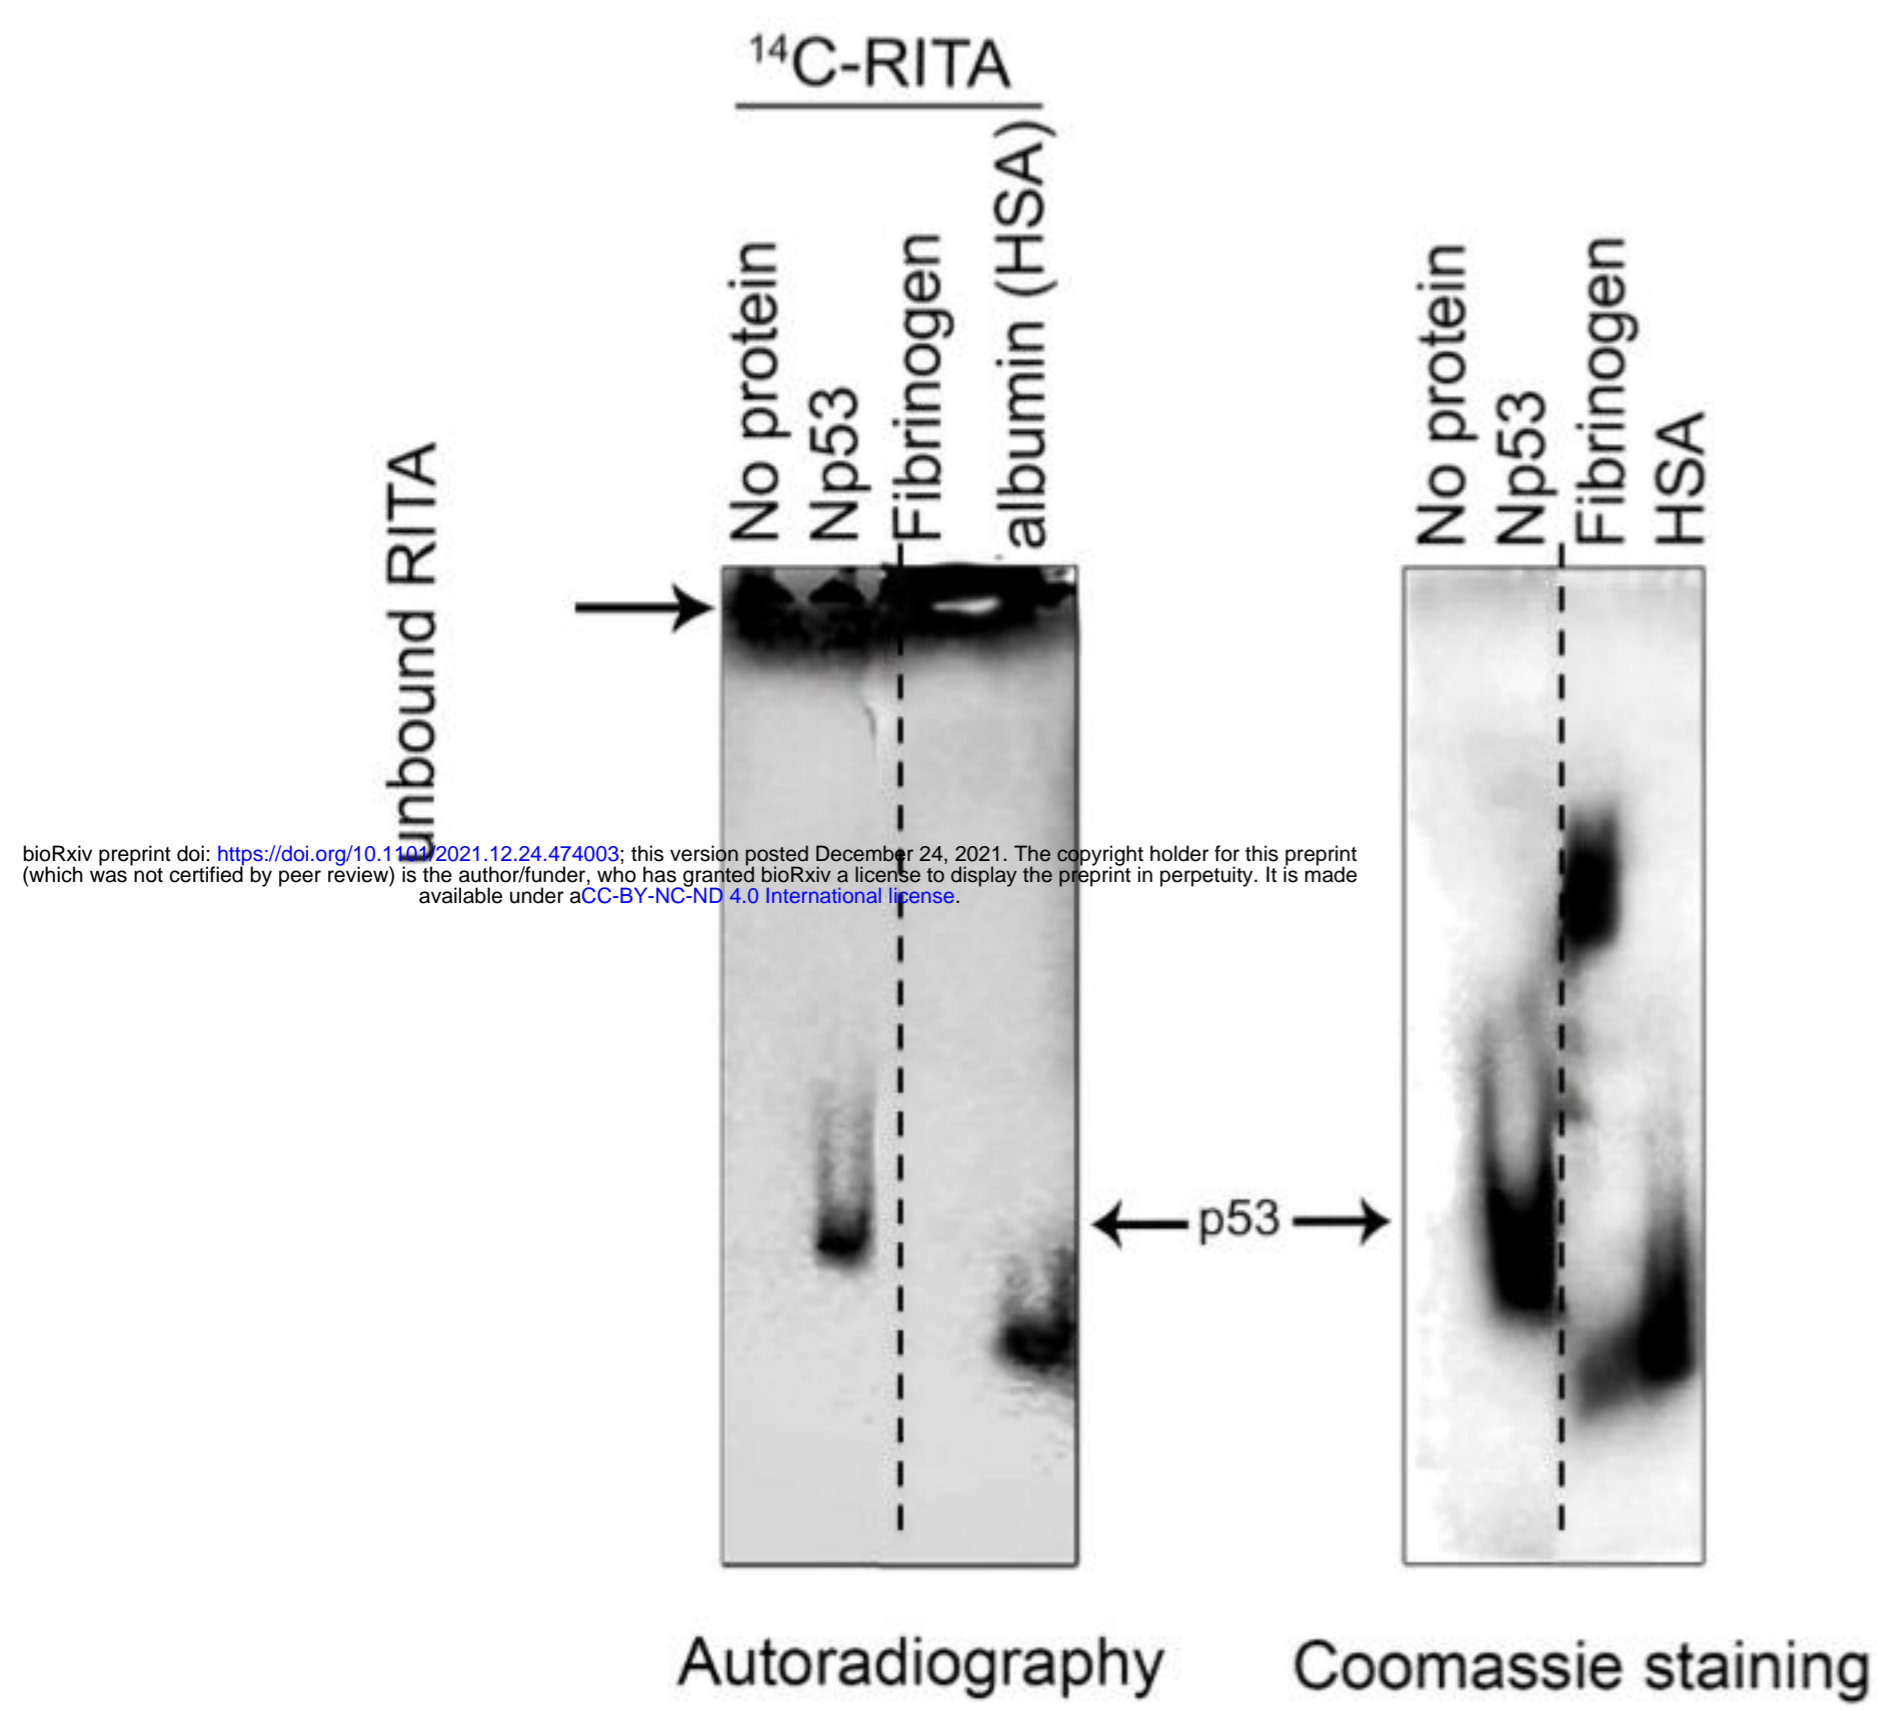

**D.**

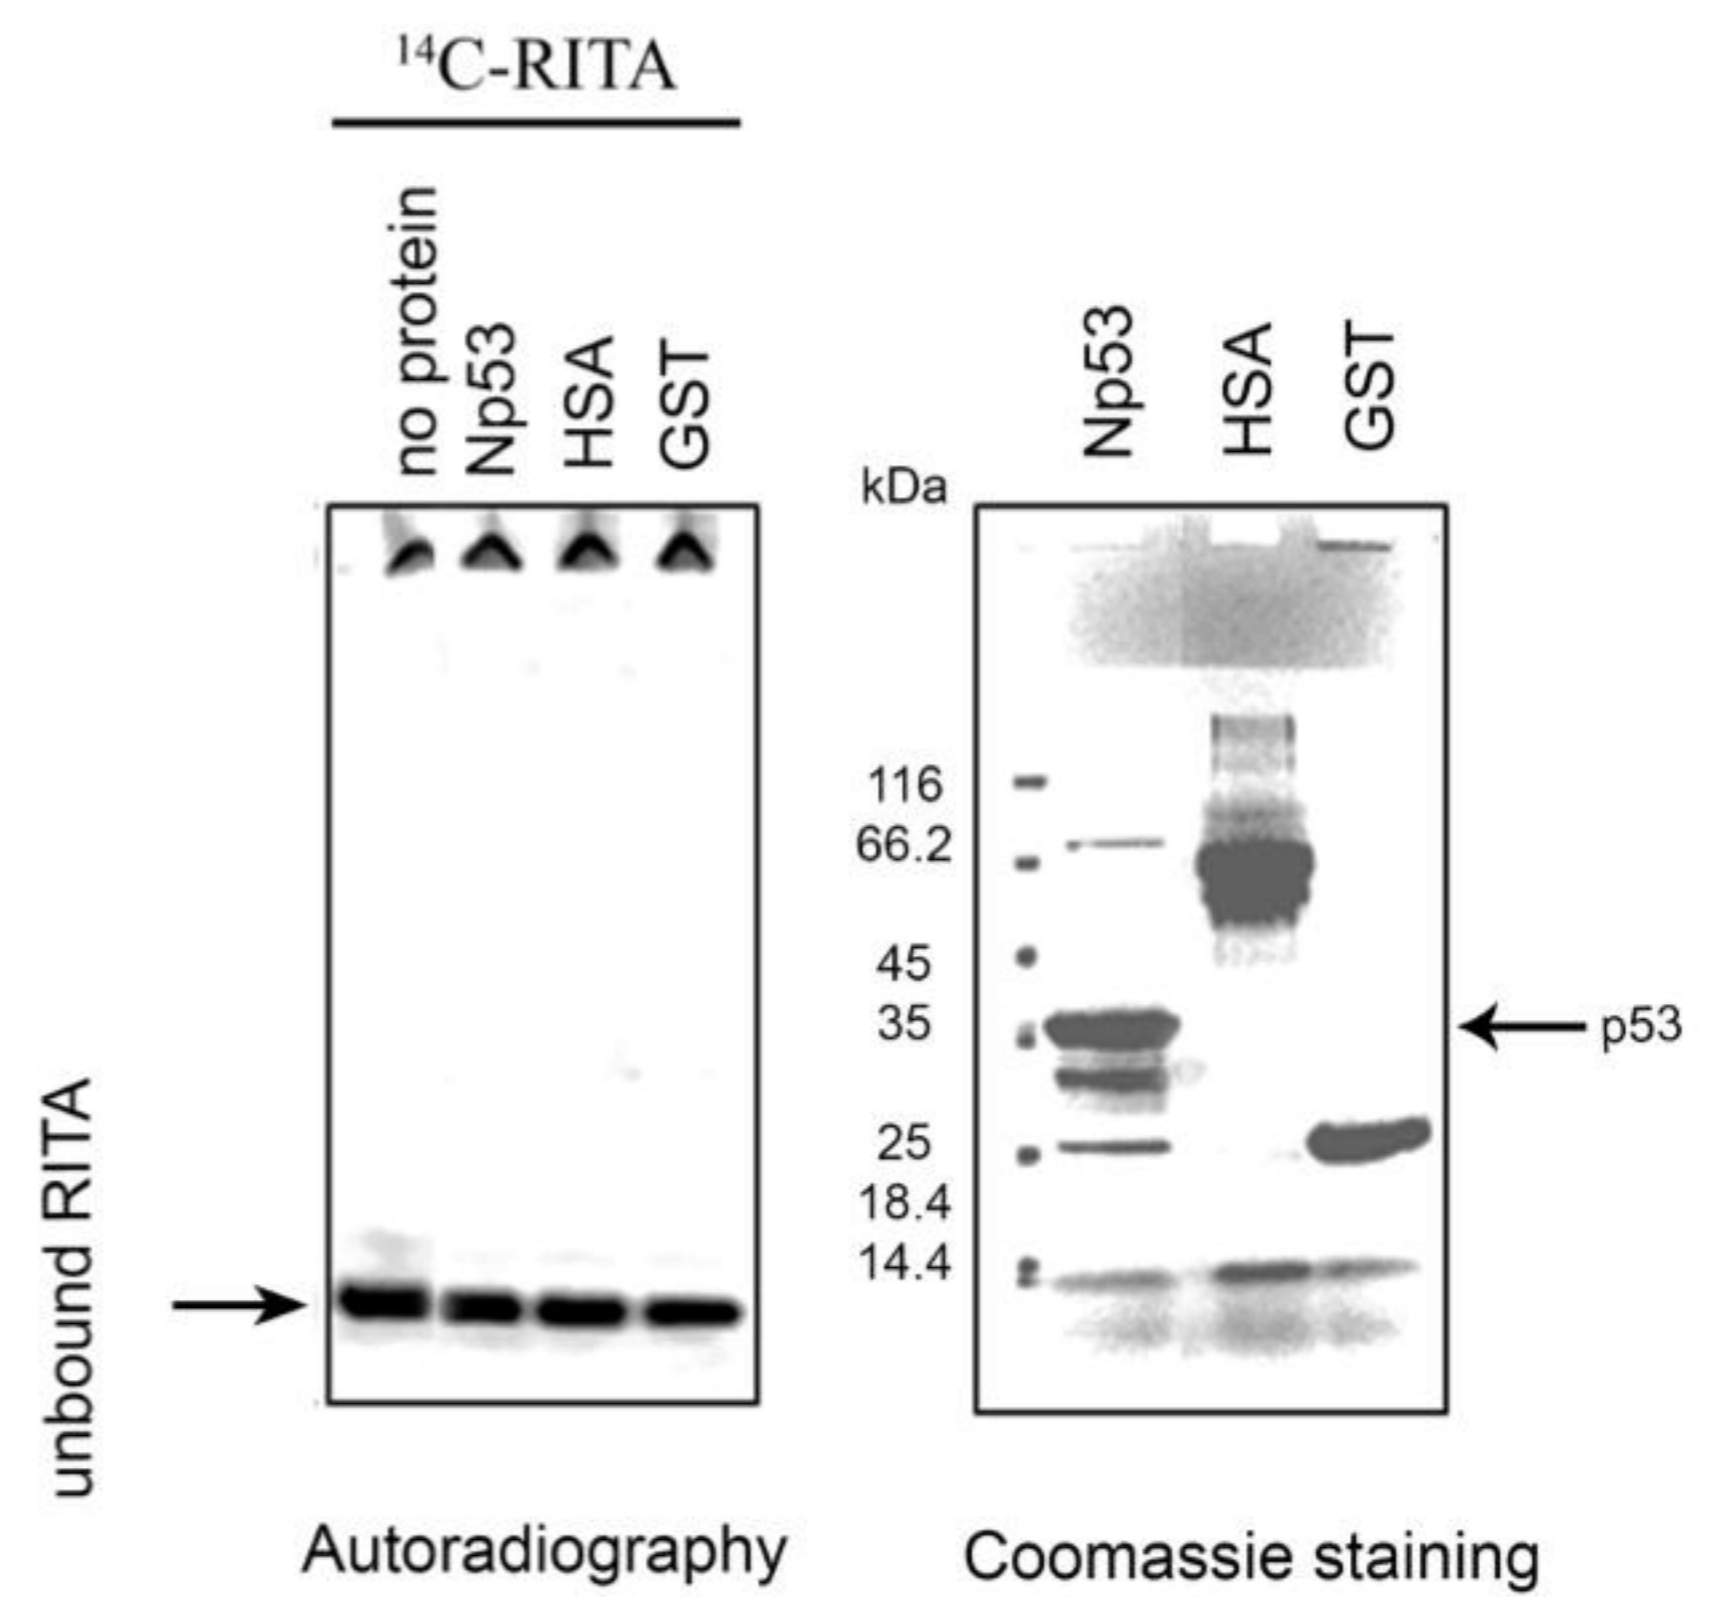



A.

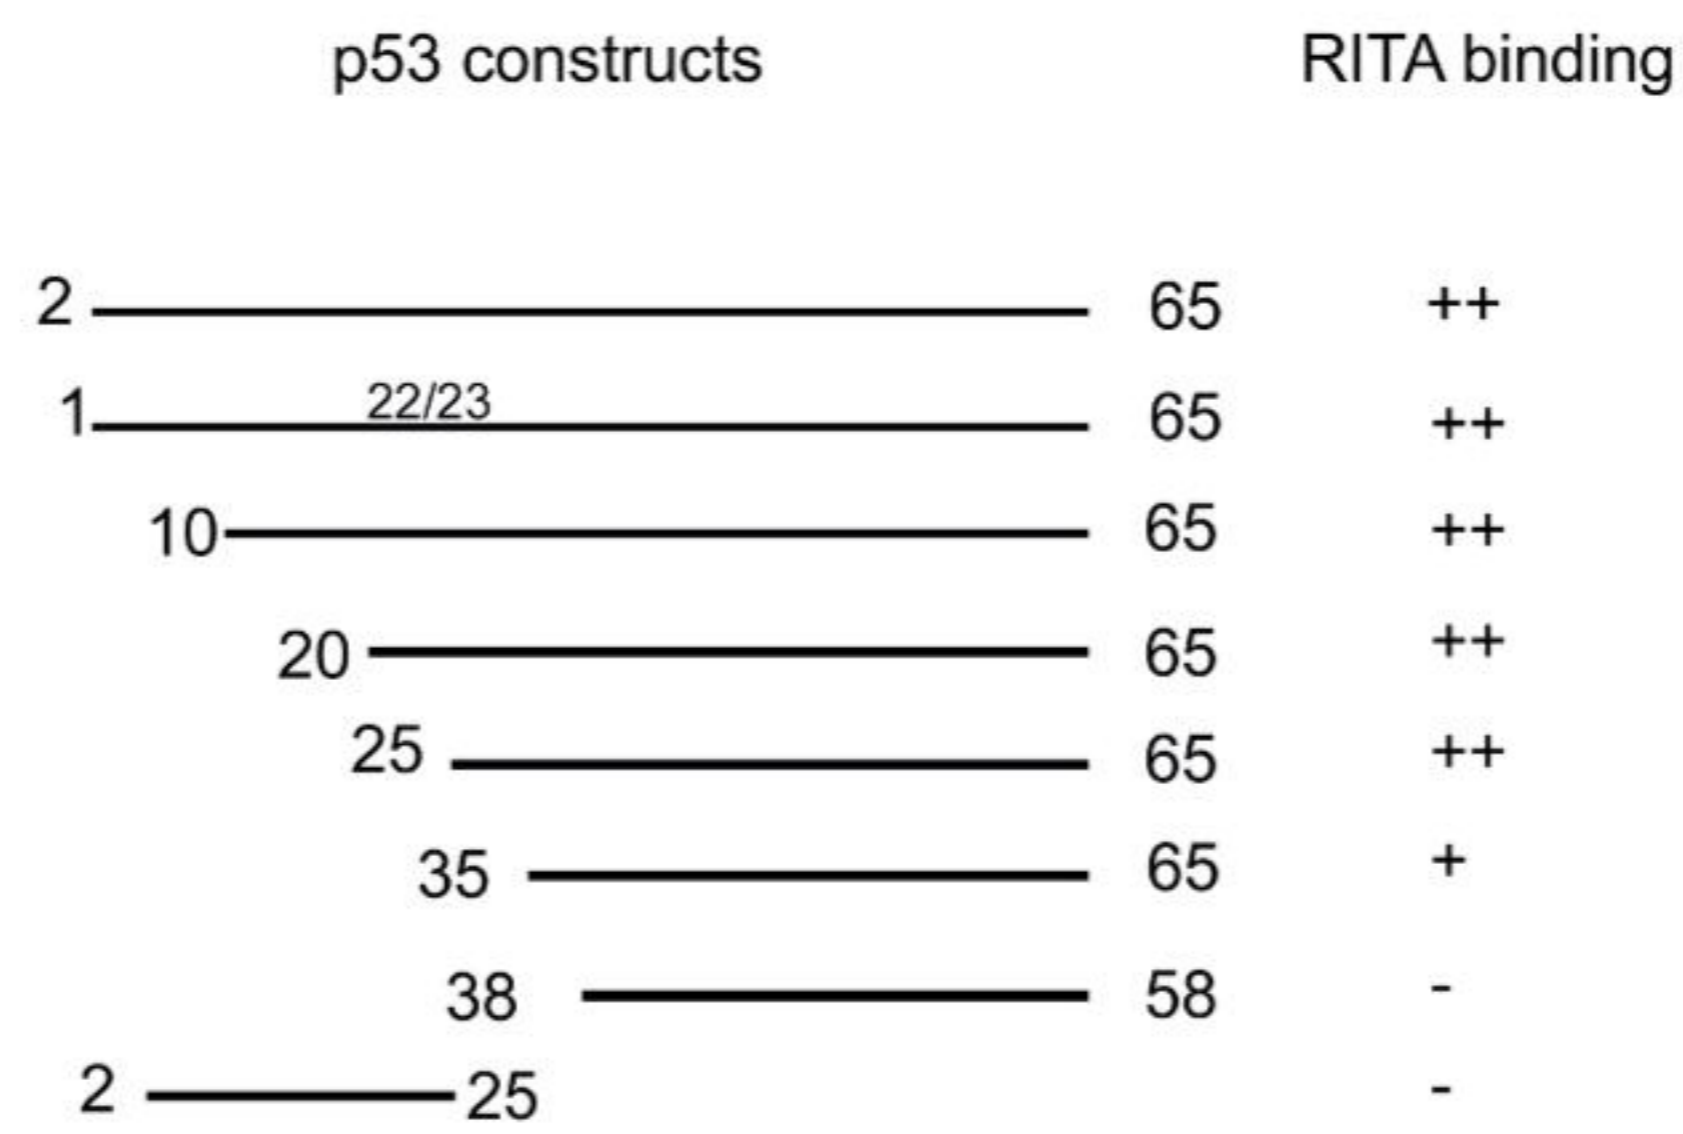

B.

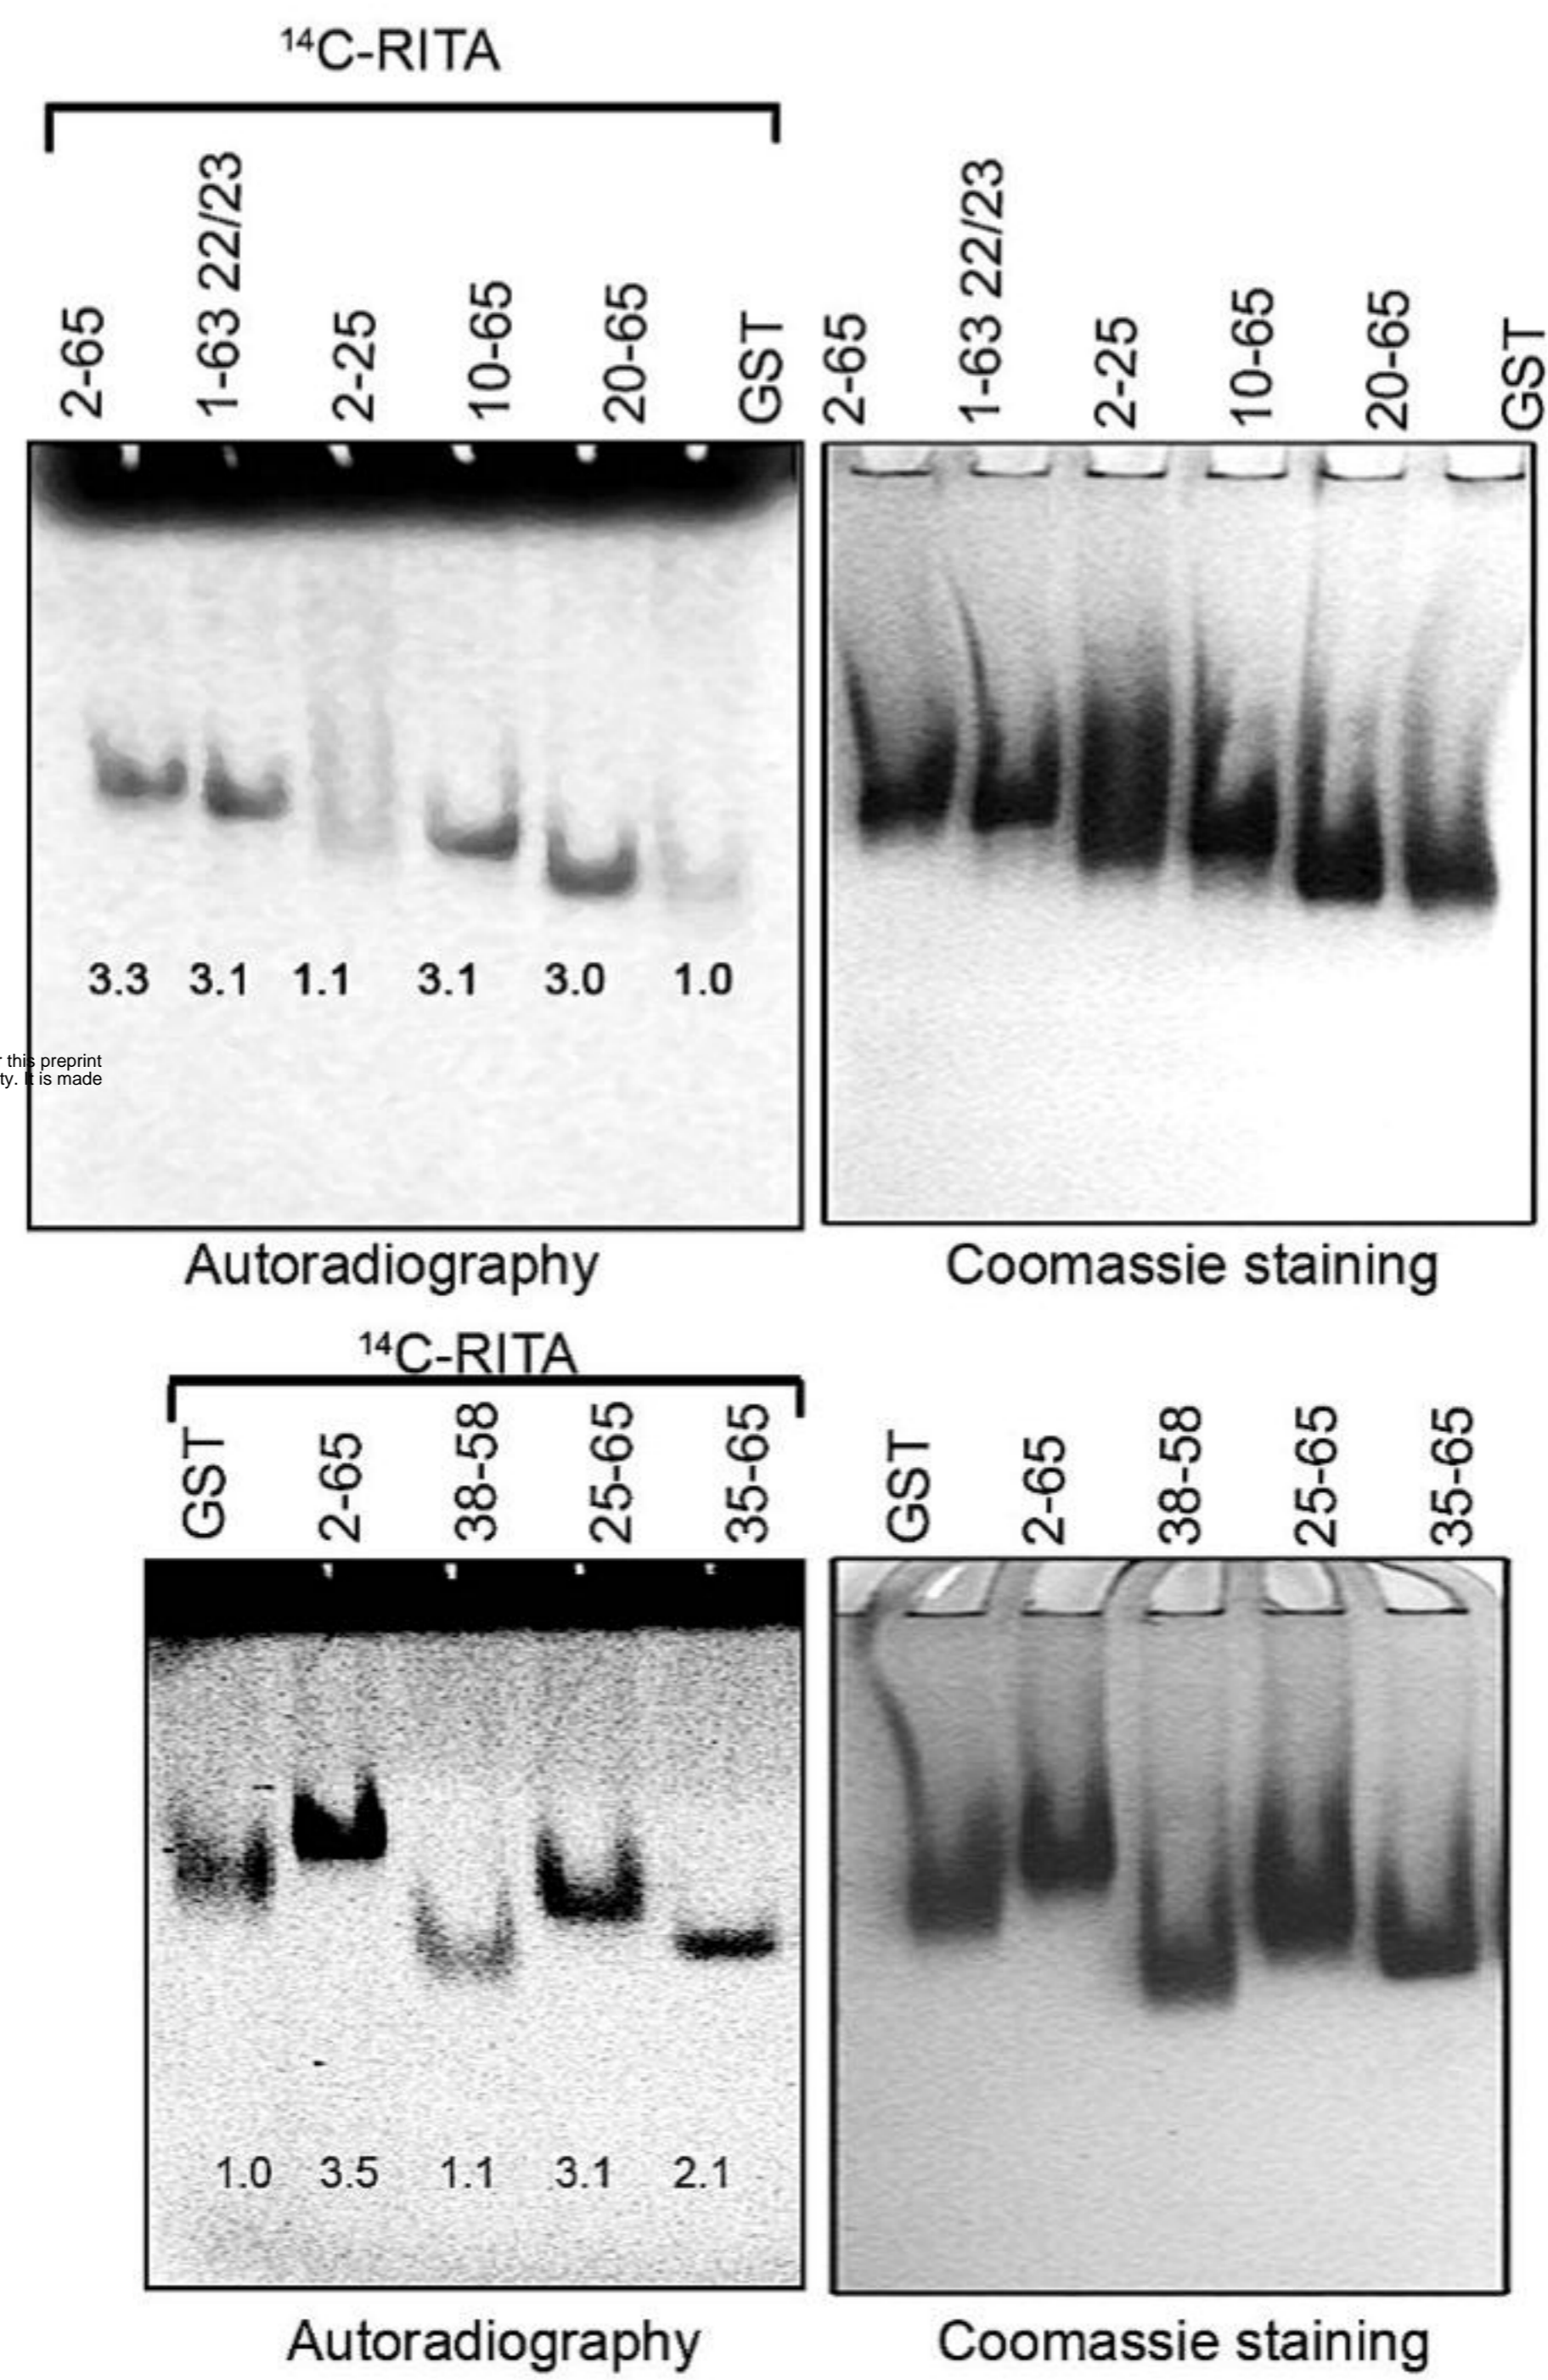

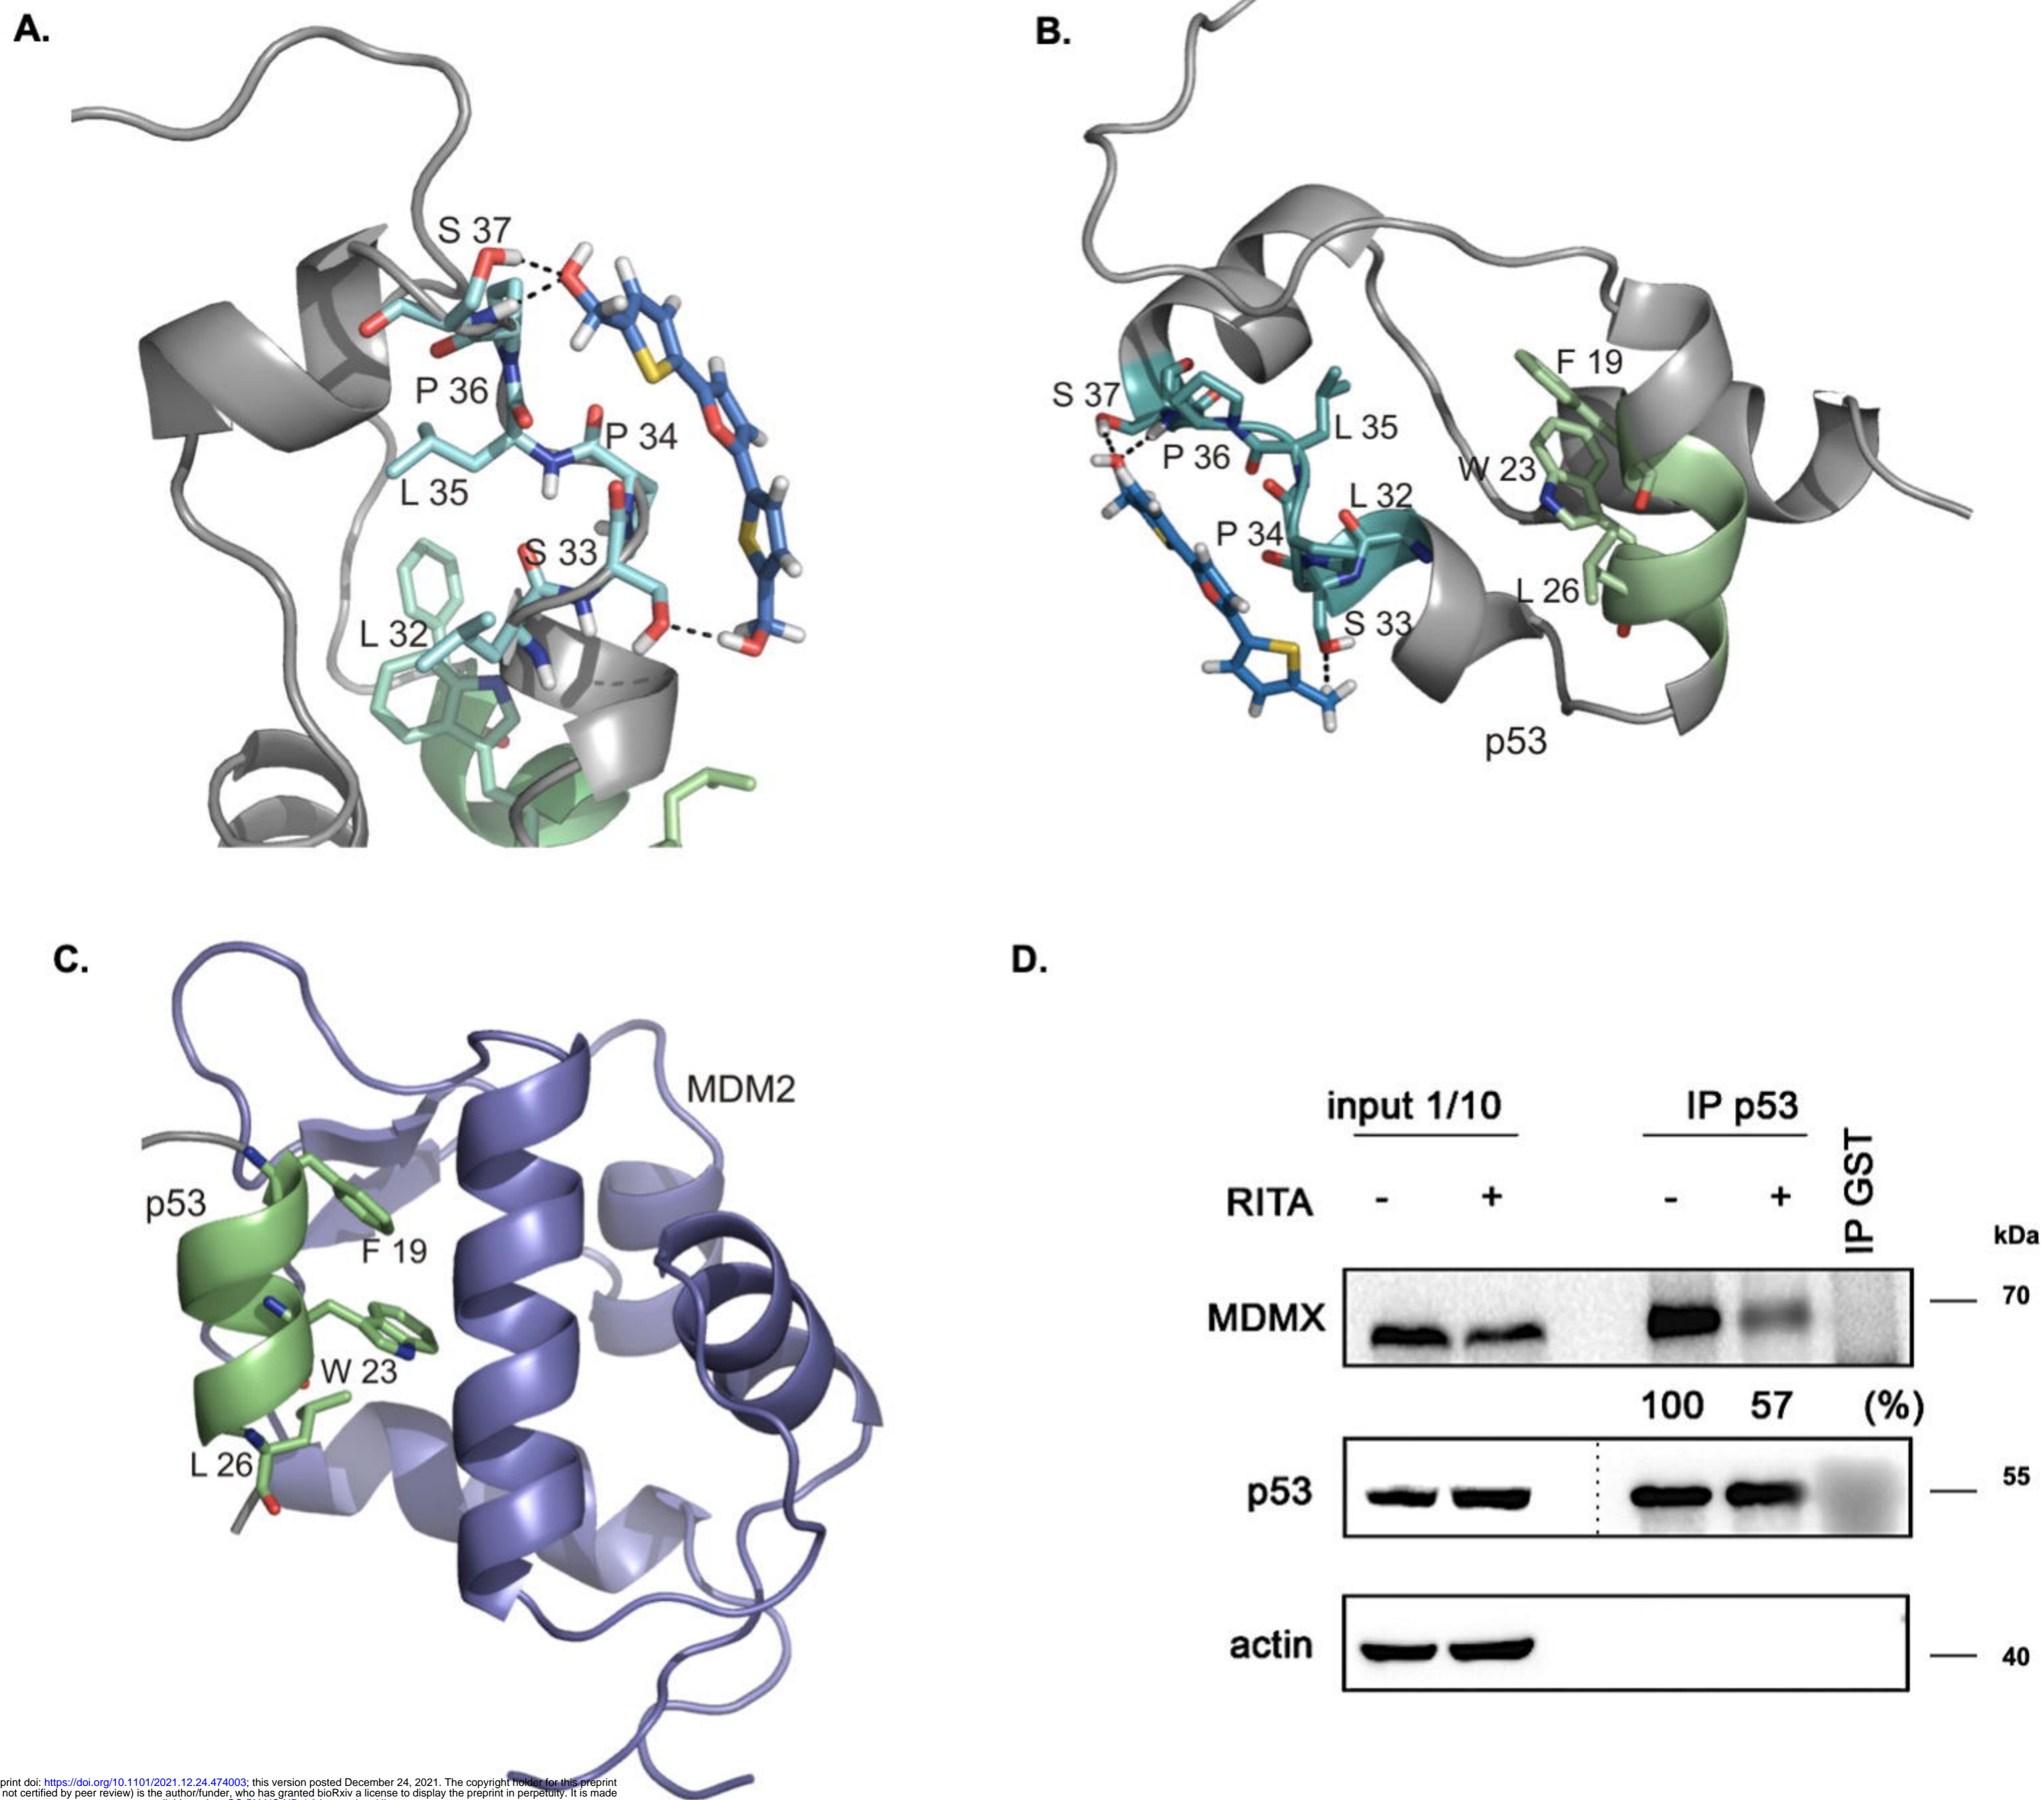

bioRxiv preprint doi: <https://doi.org/10.1101/2021.12.24.474003>; this version posted December 24, 2021. The copyright holder for this preprint (which was not certified by peer review) is the author/funder, who has granted bioRxiv a license to display the preprint in perpetuity. It is made available under aCC-BY-NC-ND 4.0 International license.

**E. Yeast-based reporter assay**

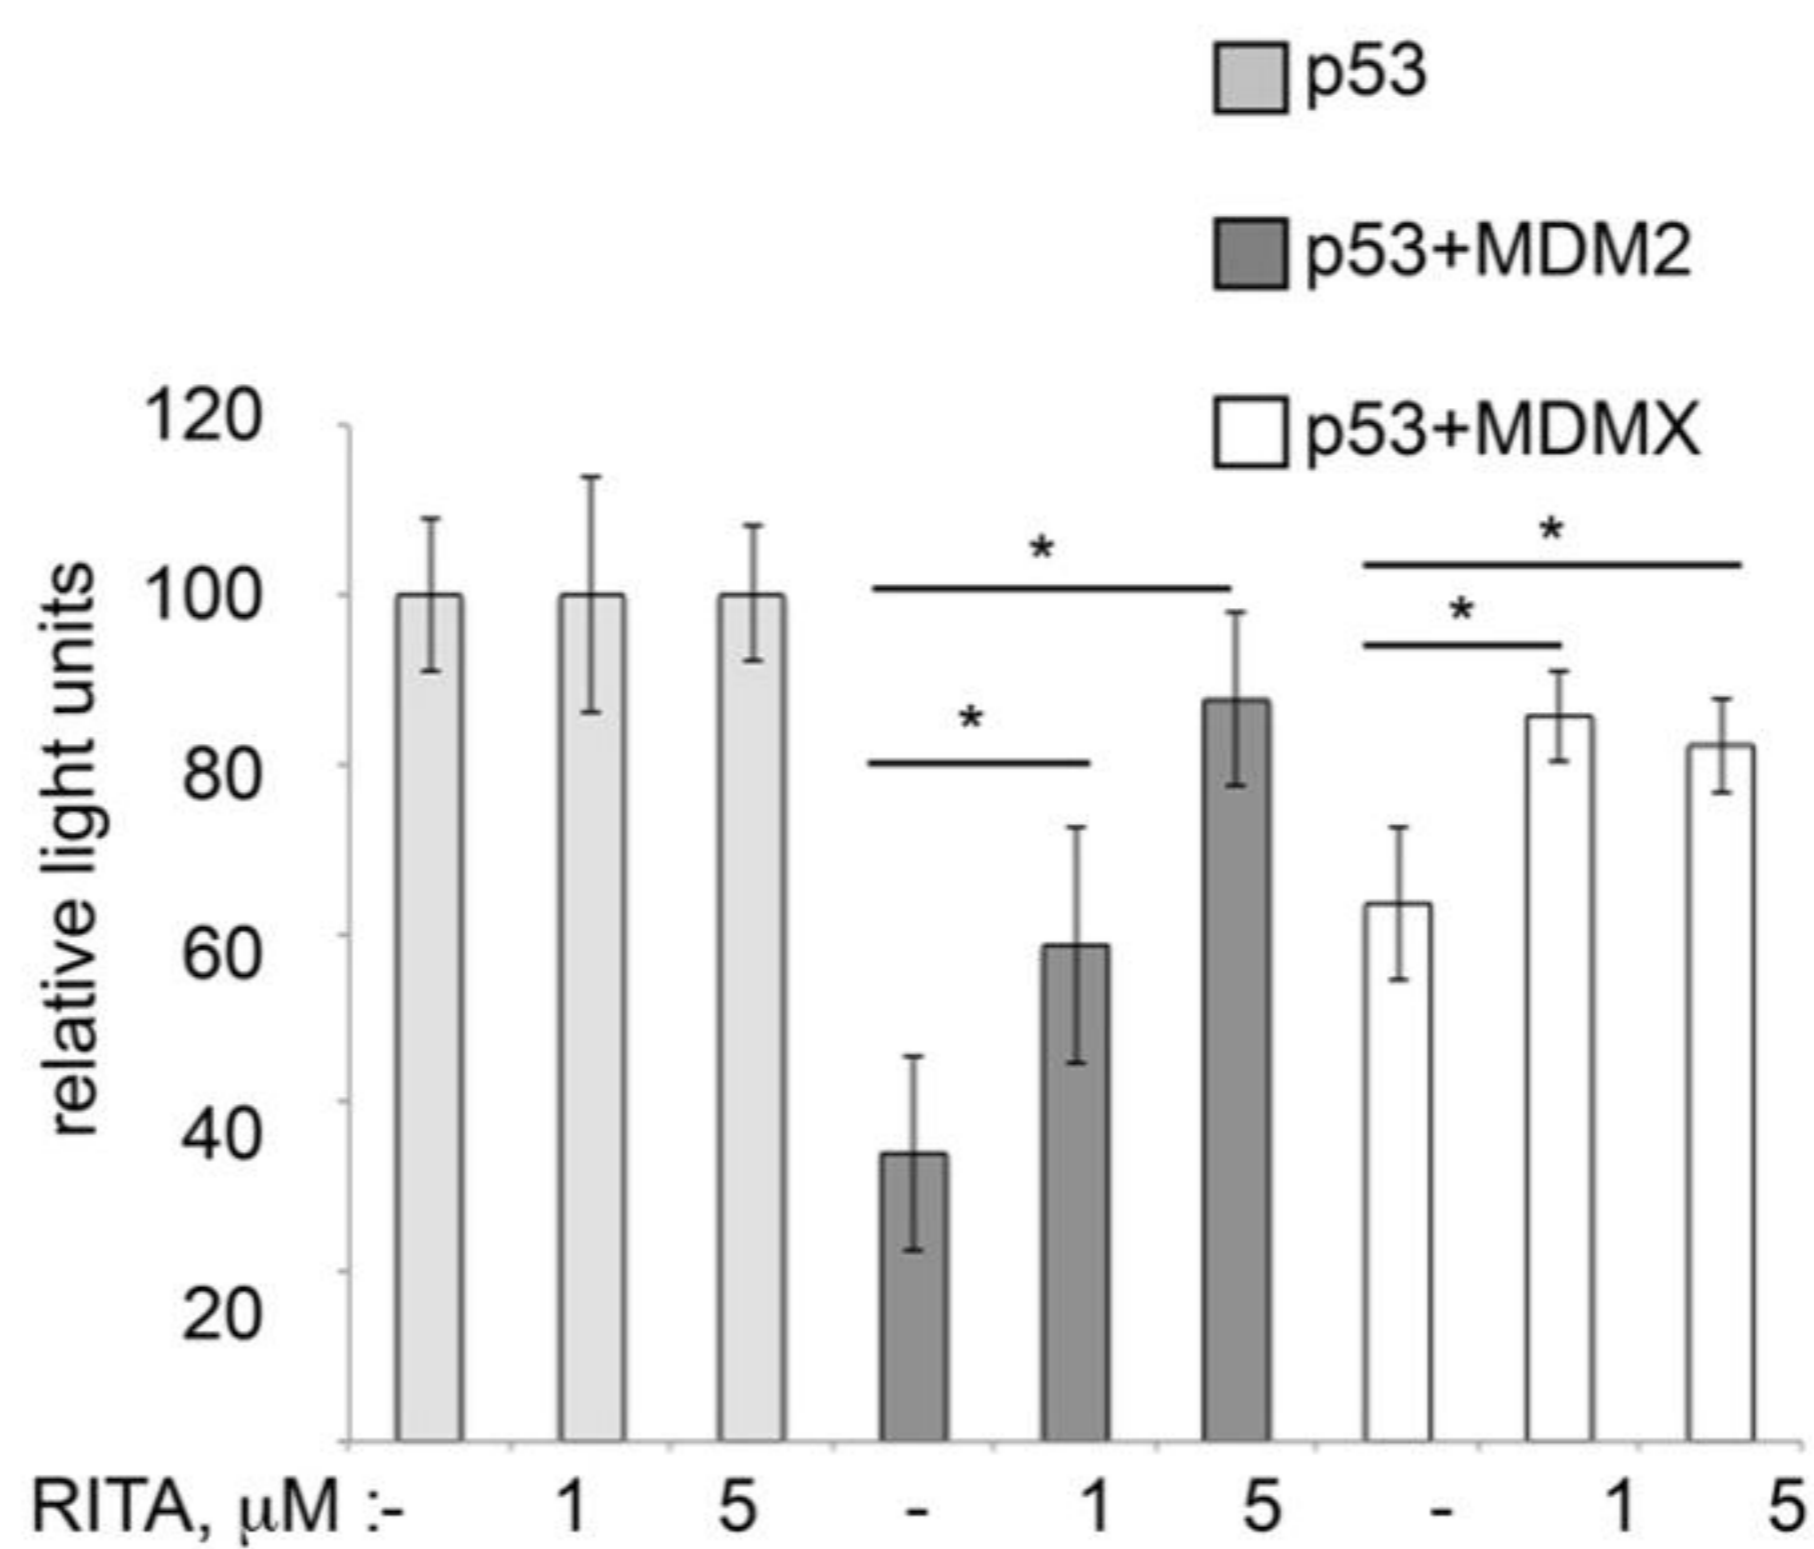

A.

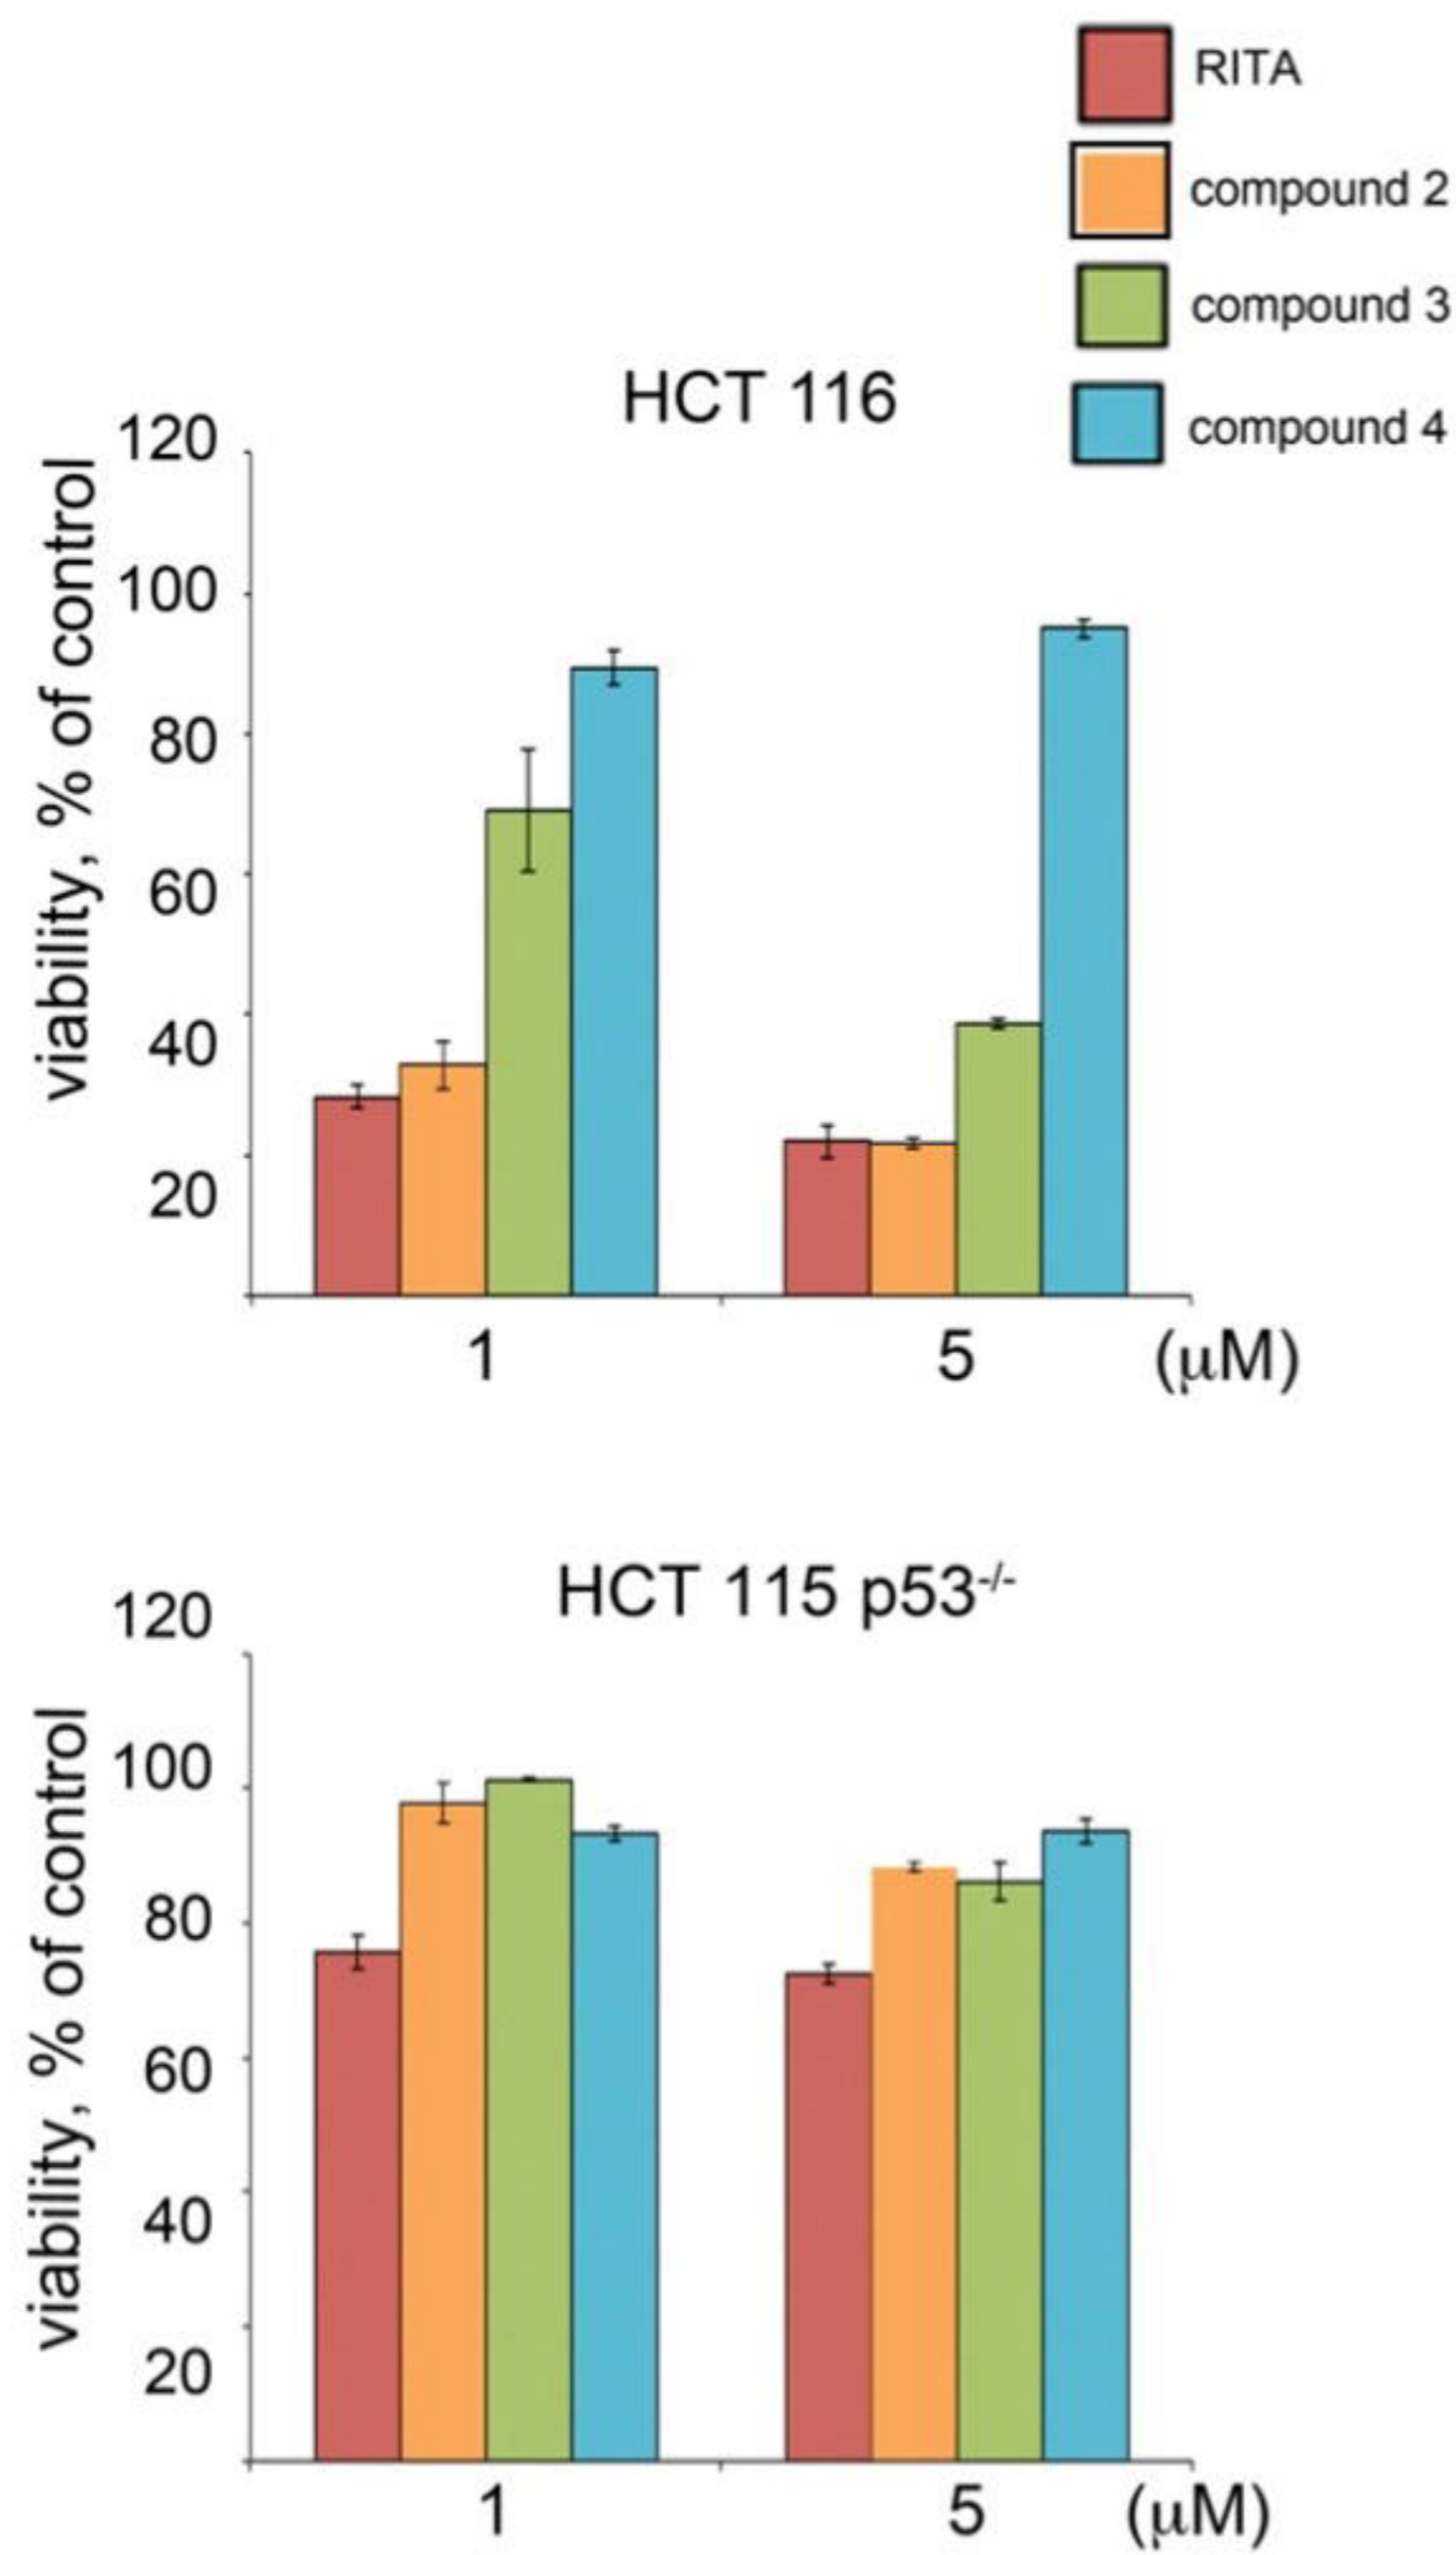

B.

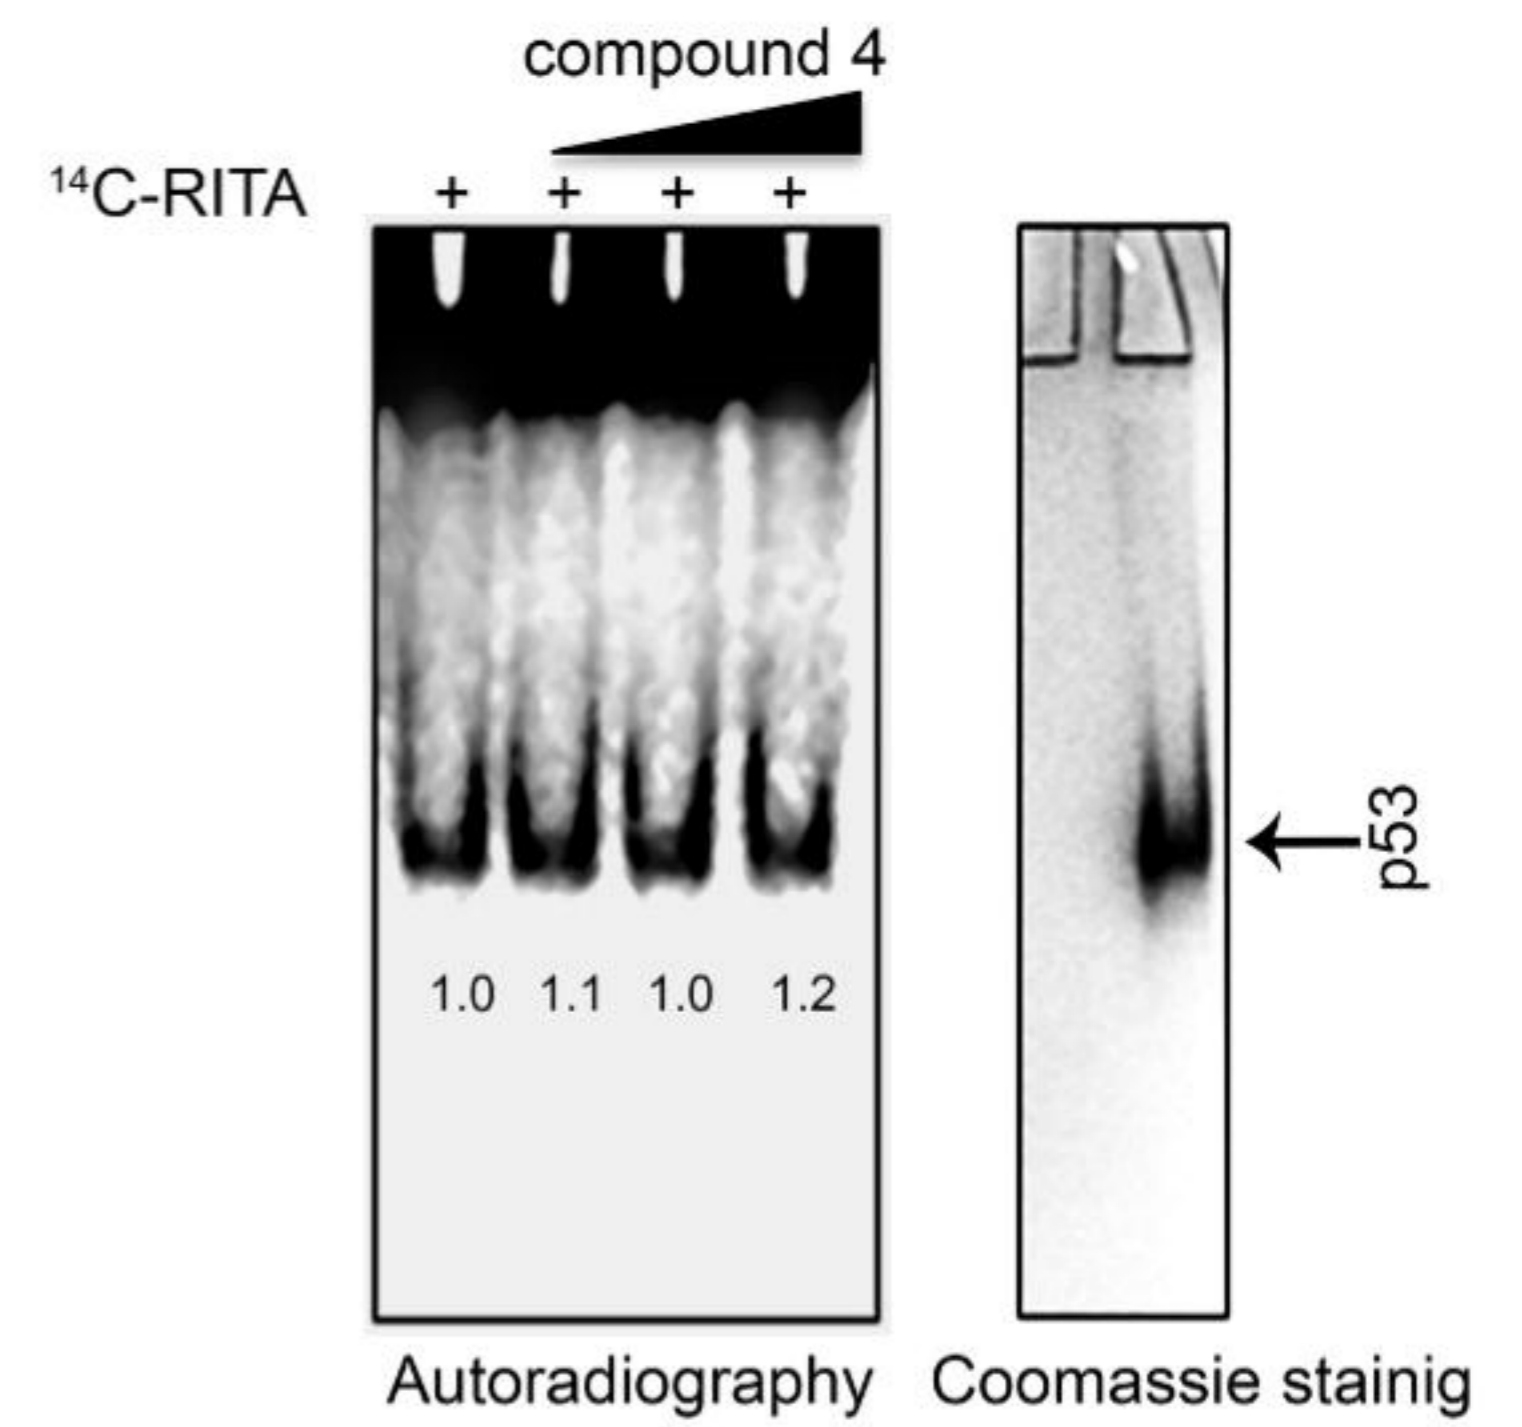

D.

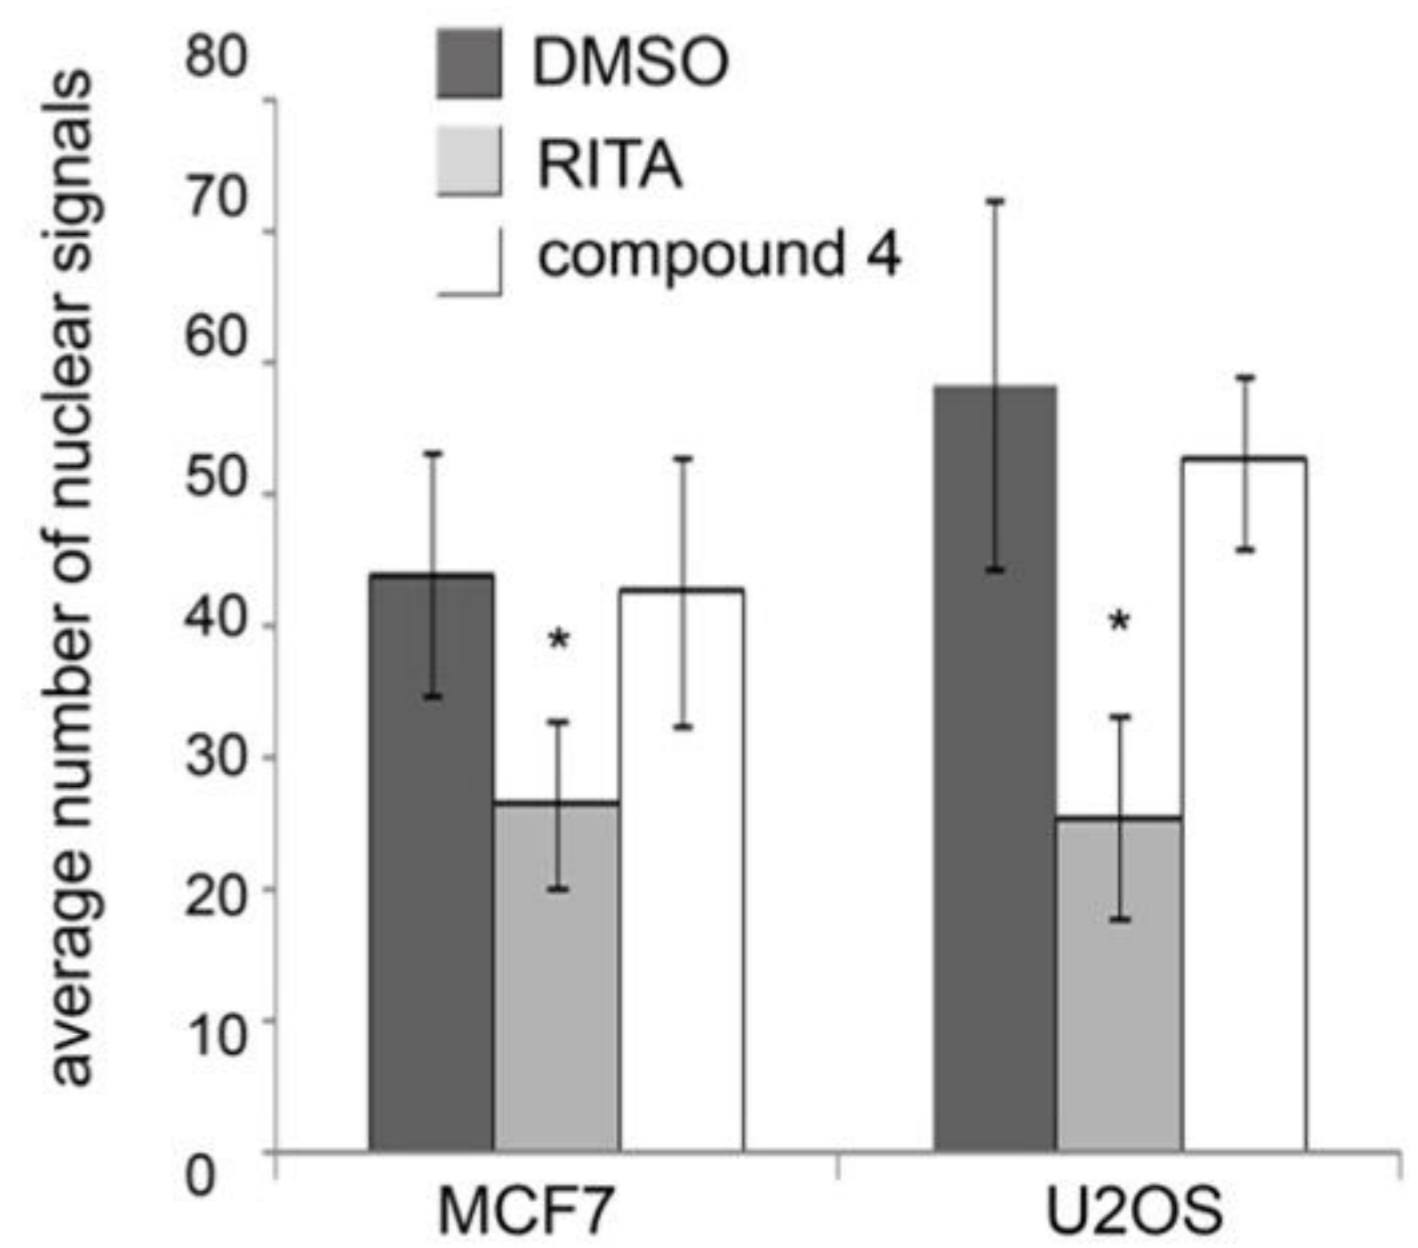

C.

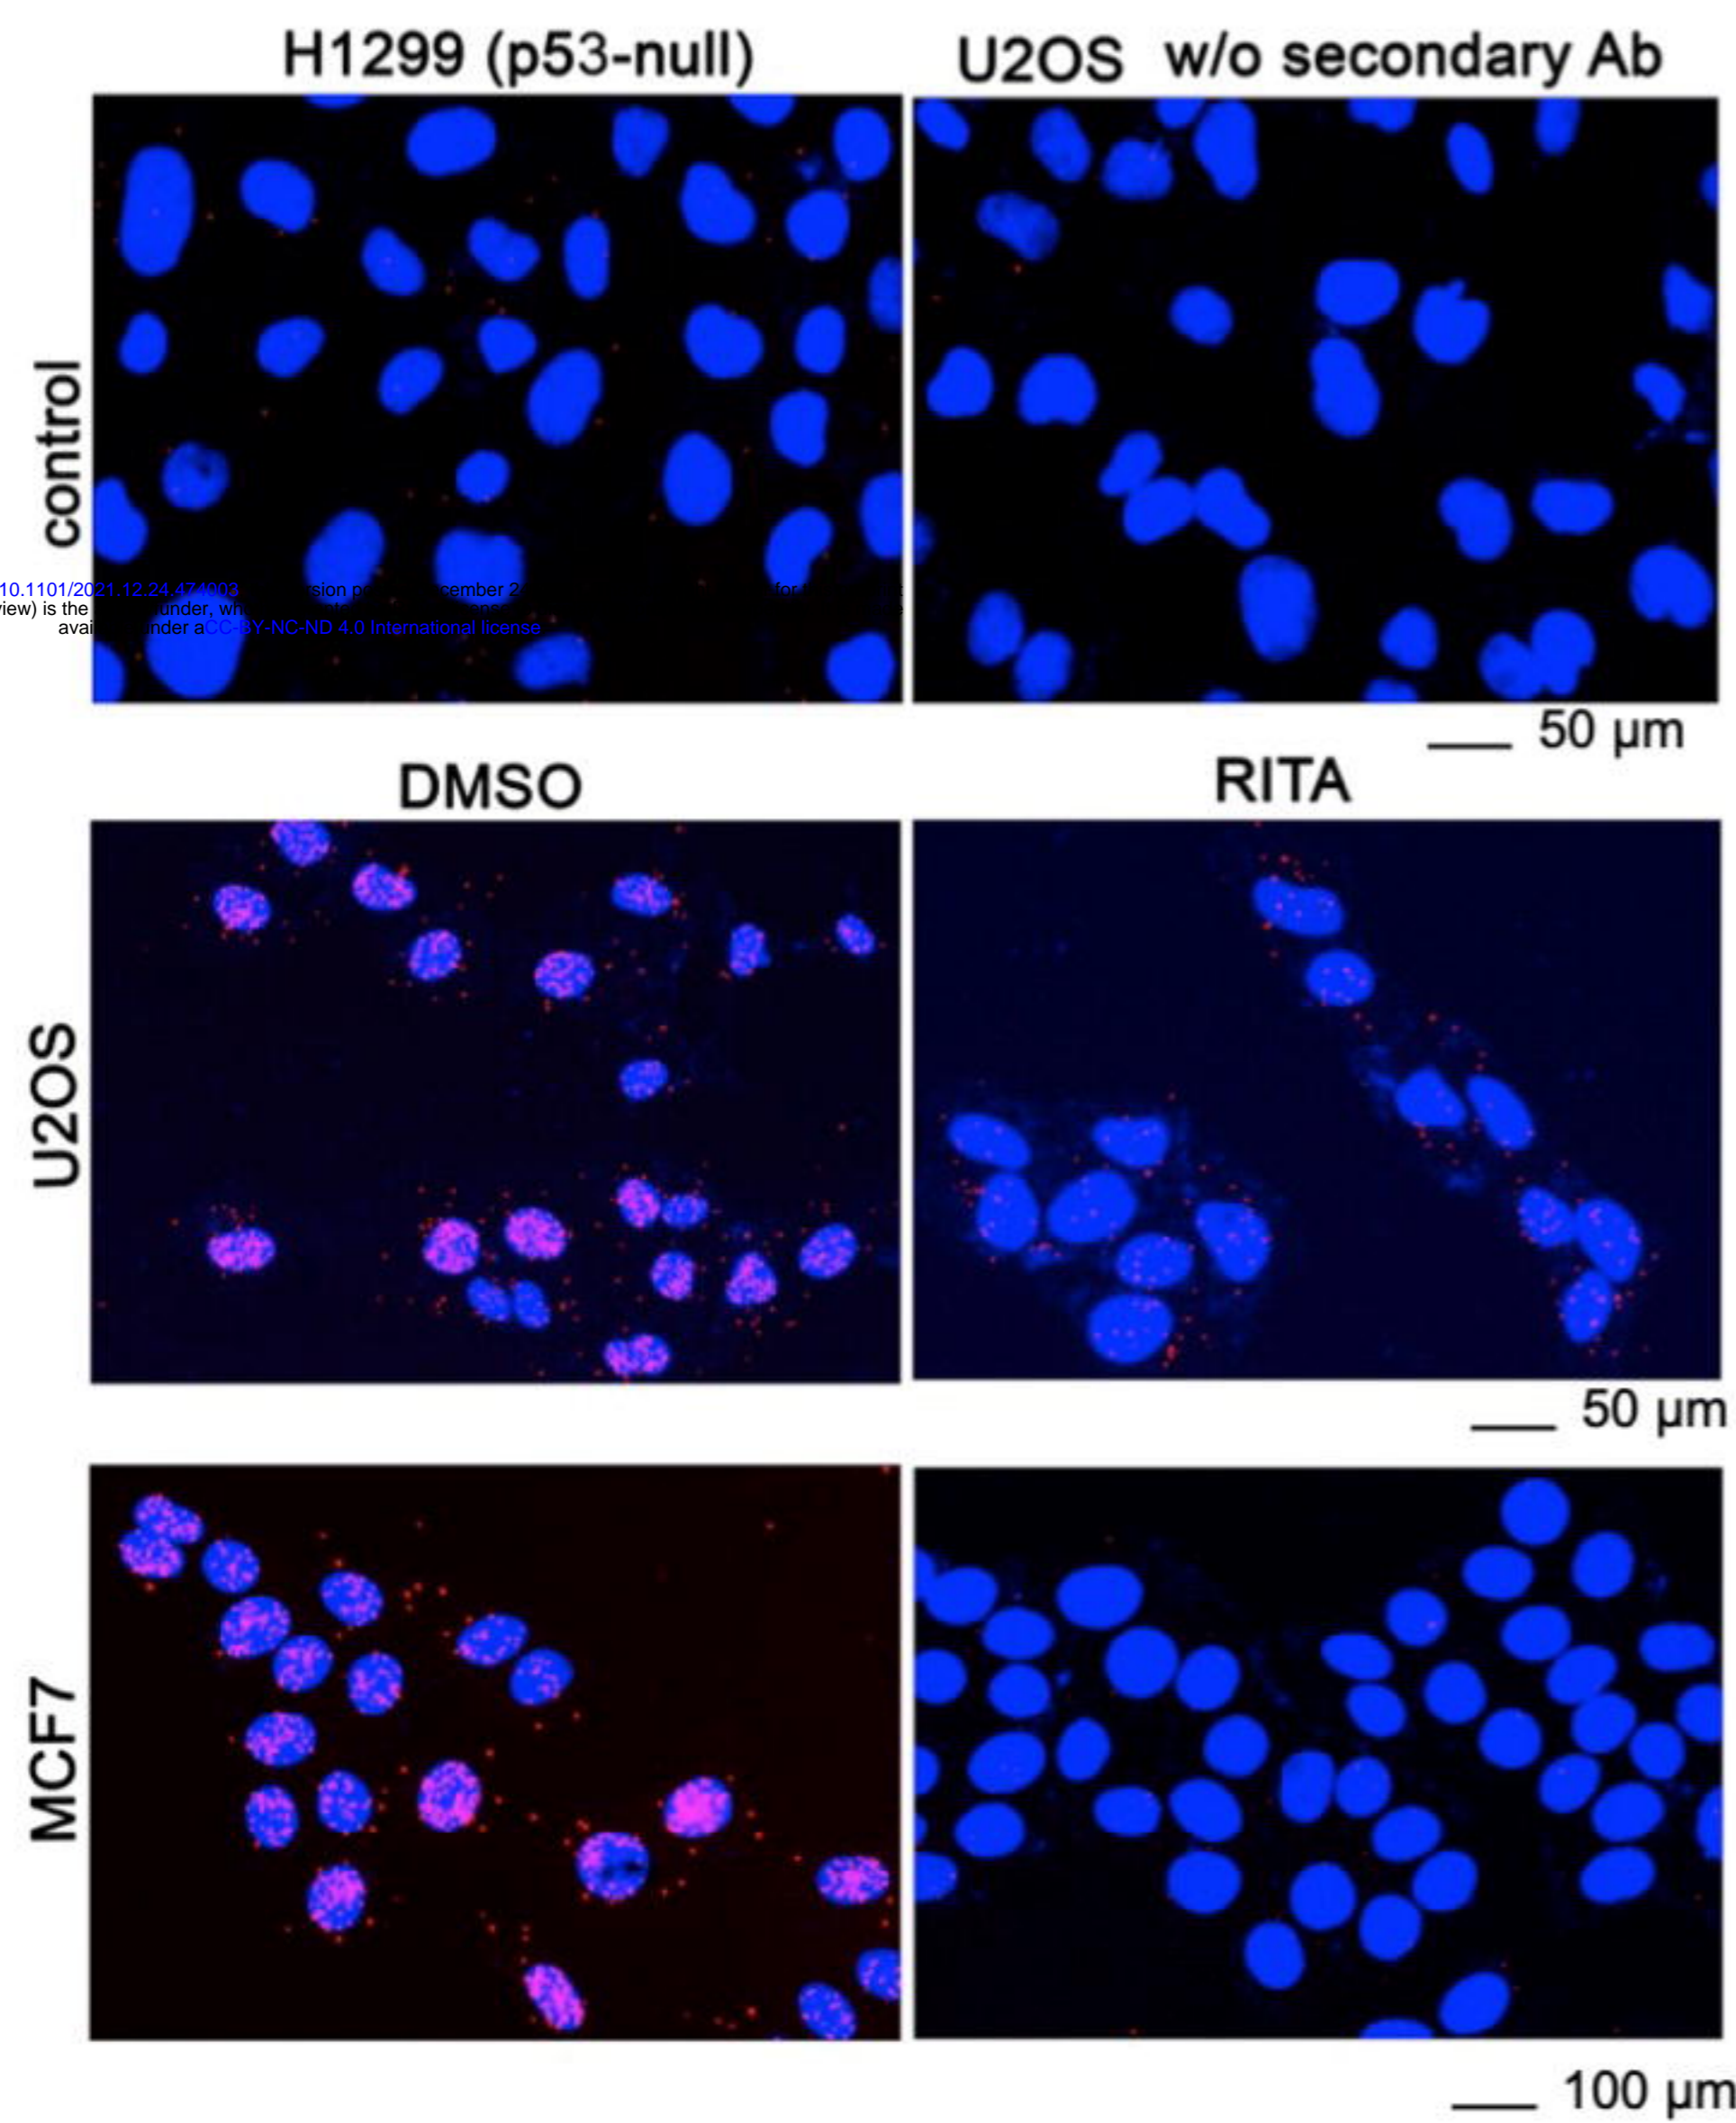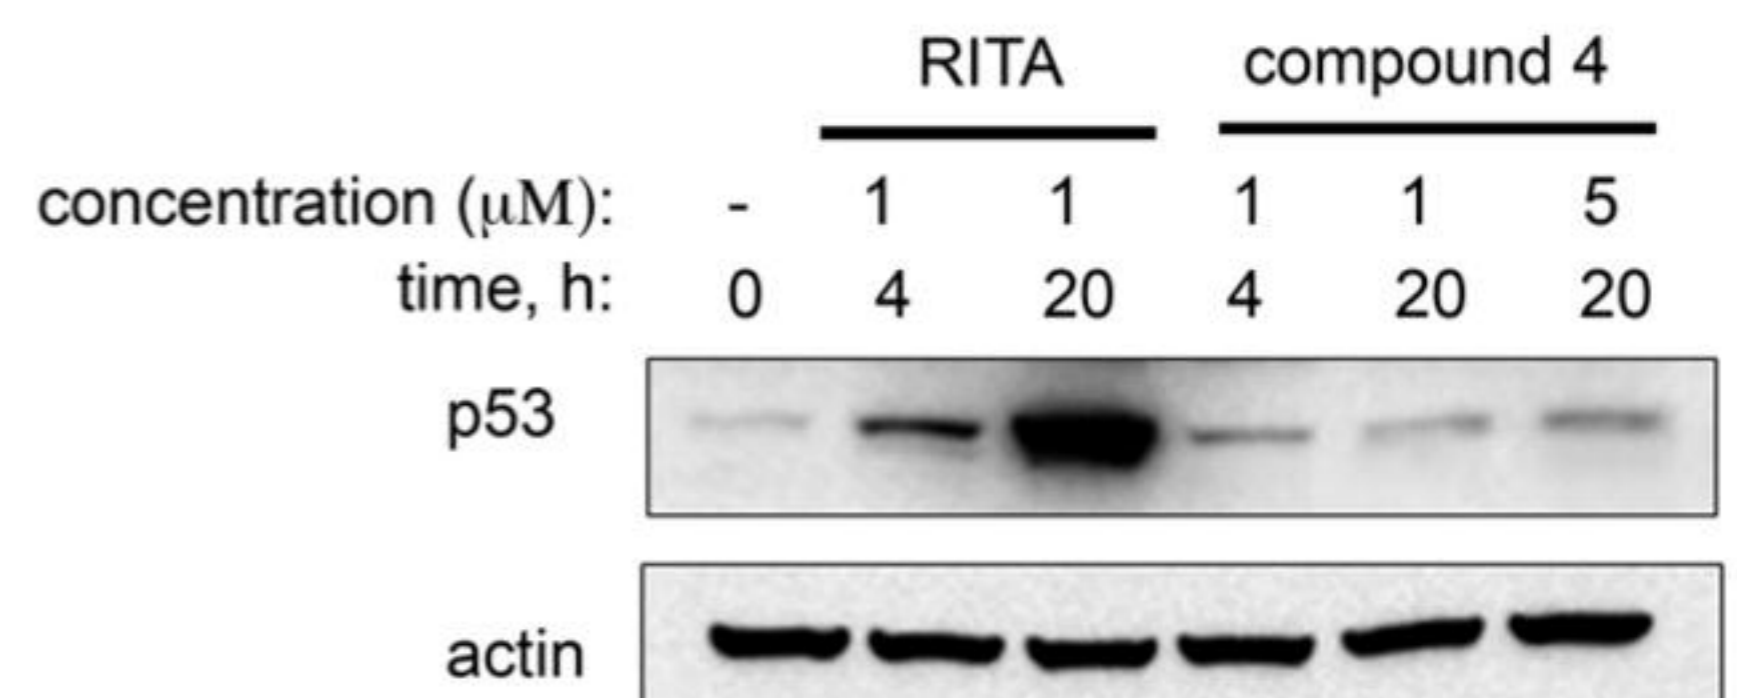

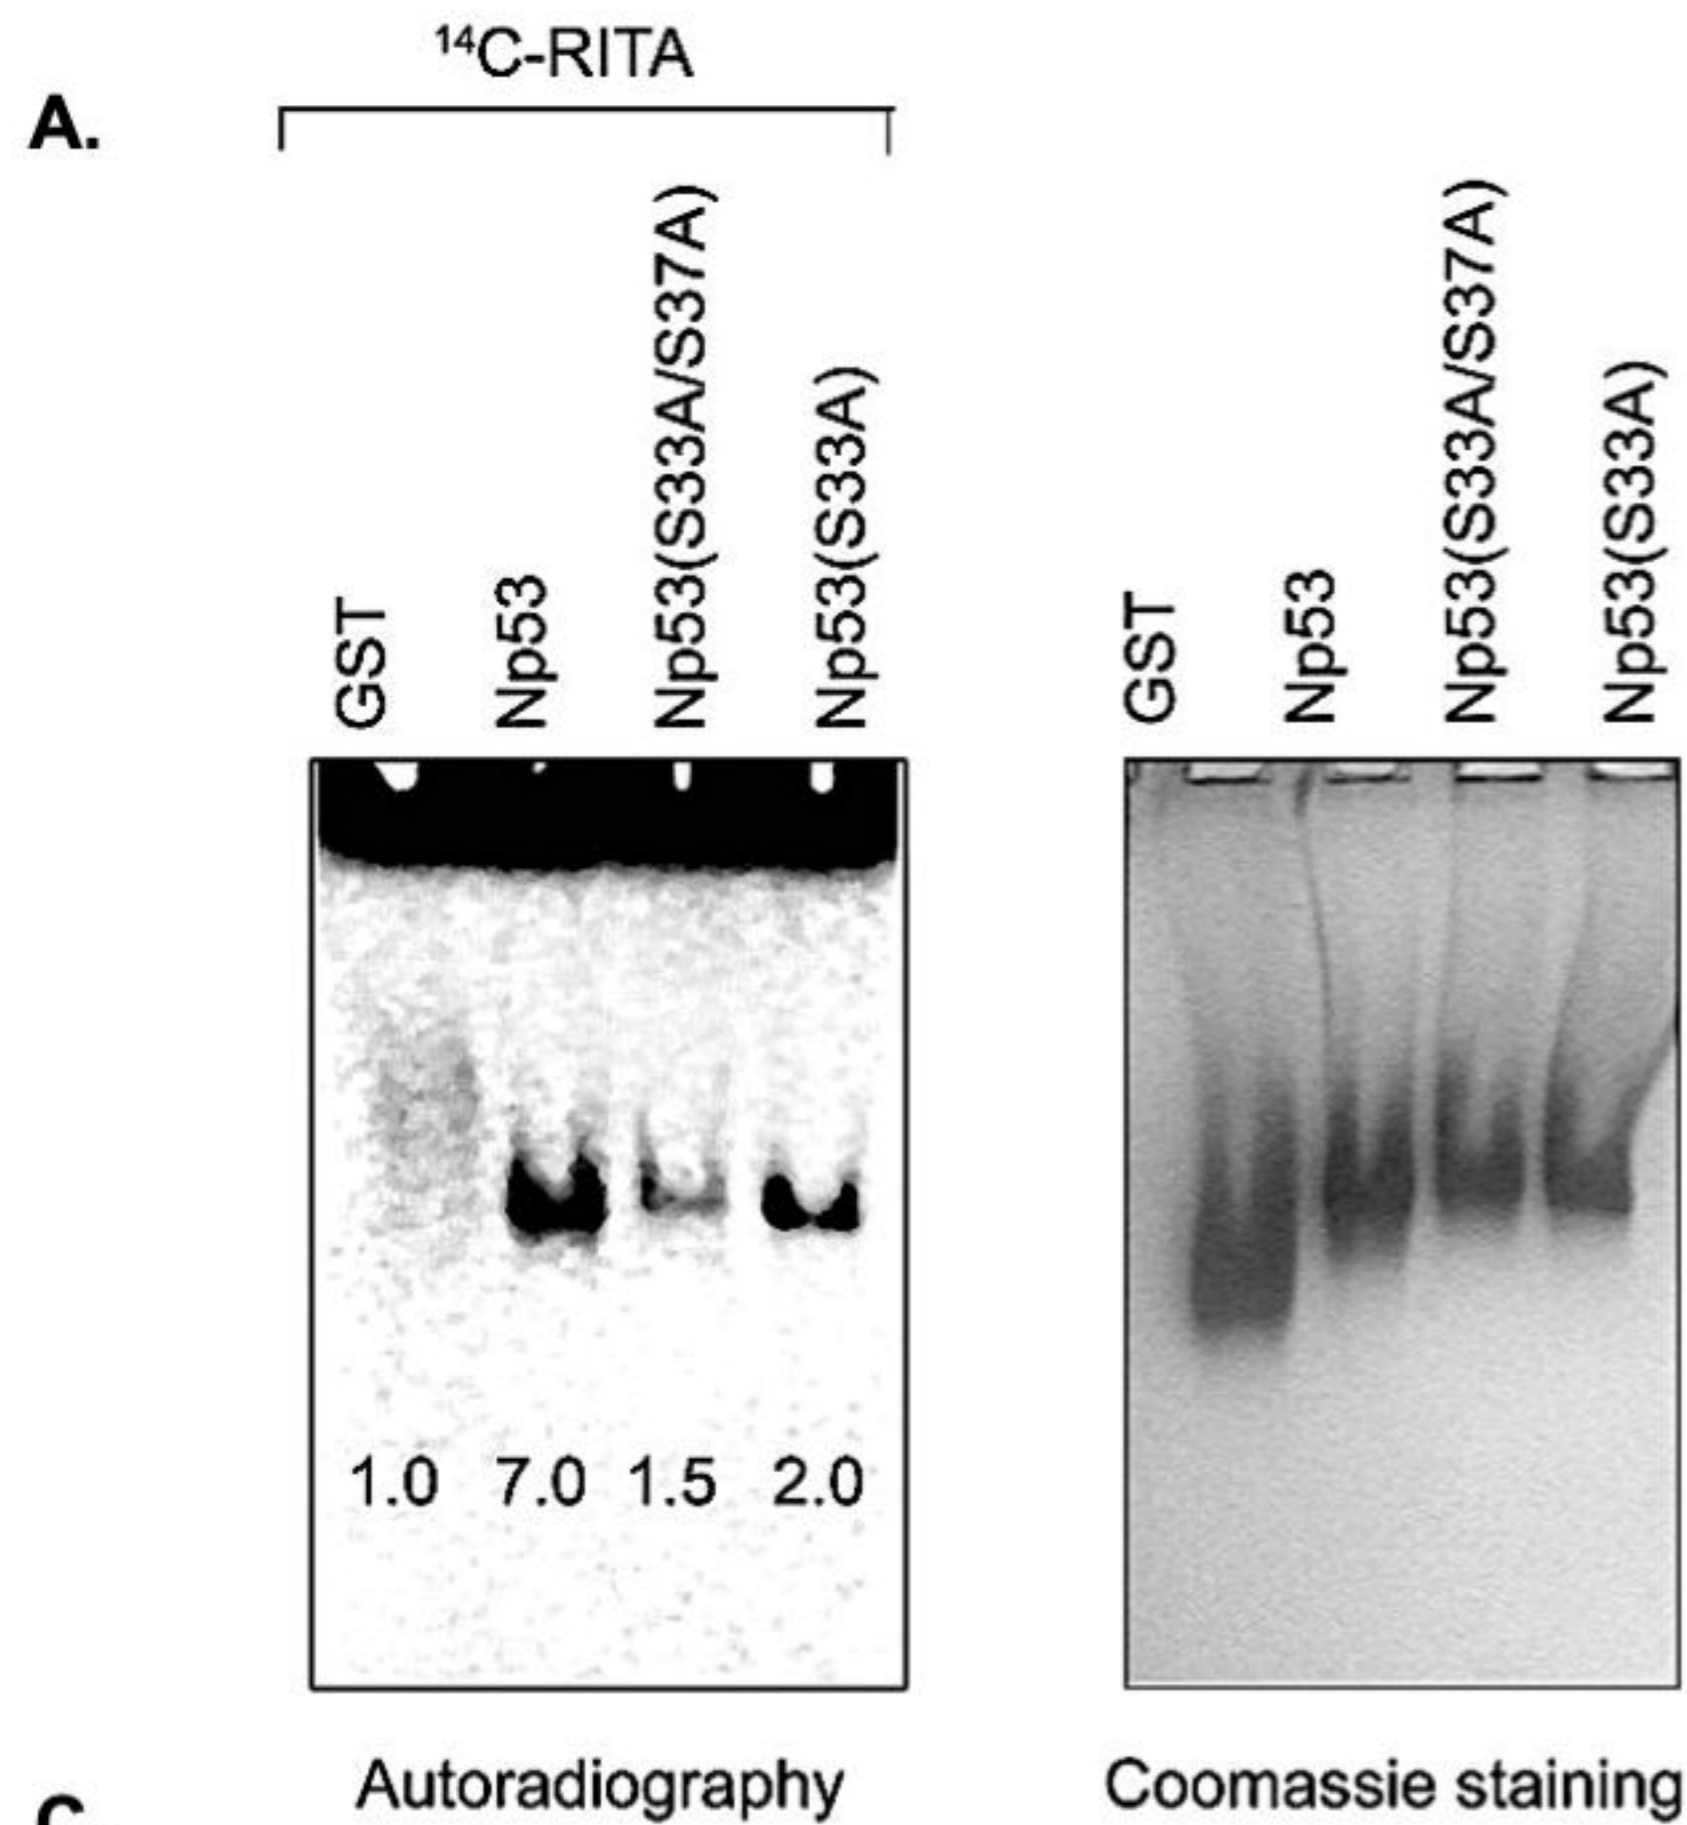

**B.**

MDM2-binding site RITA-binding site

H. sapiens 10 20 30  
EPPLSQETFS~~DLWKL~~LPENNVLSP~~LP~~SQAM

M. musculus 13 20 30  
ELPLSQETFS~~GLWKL~~LPEDIL~~PS~~PHCMDD

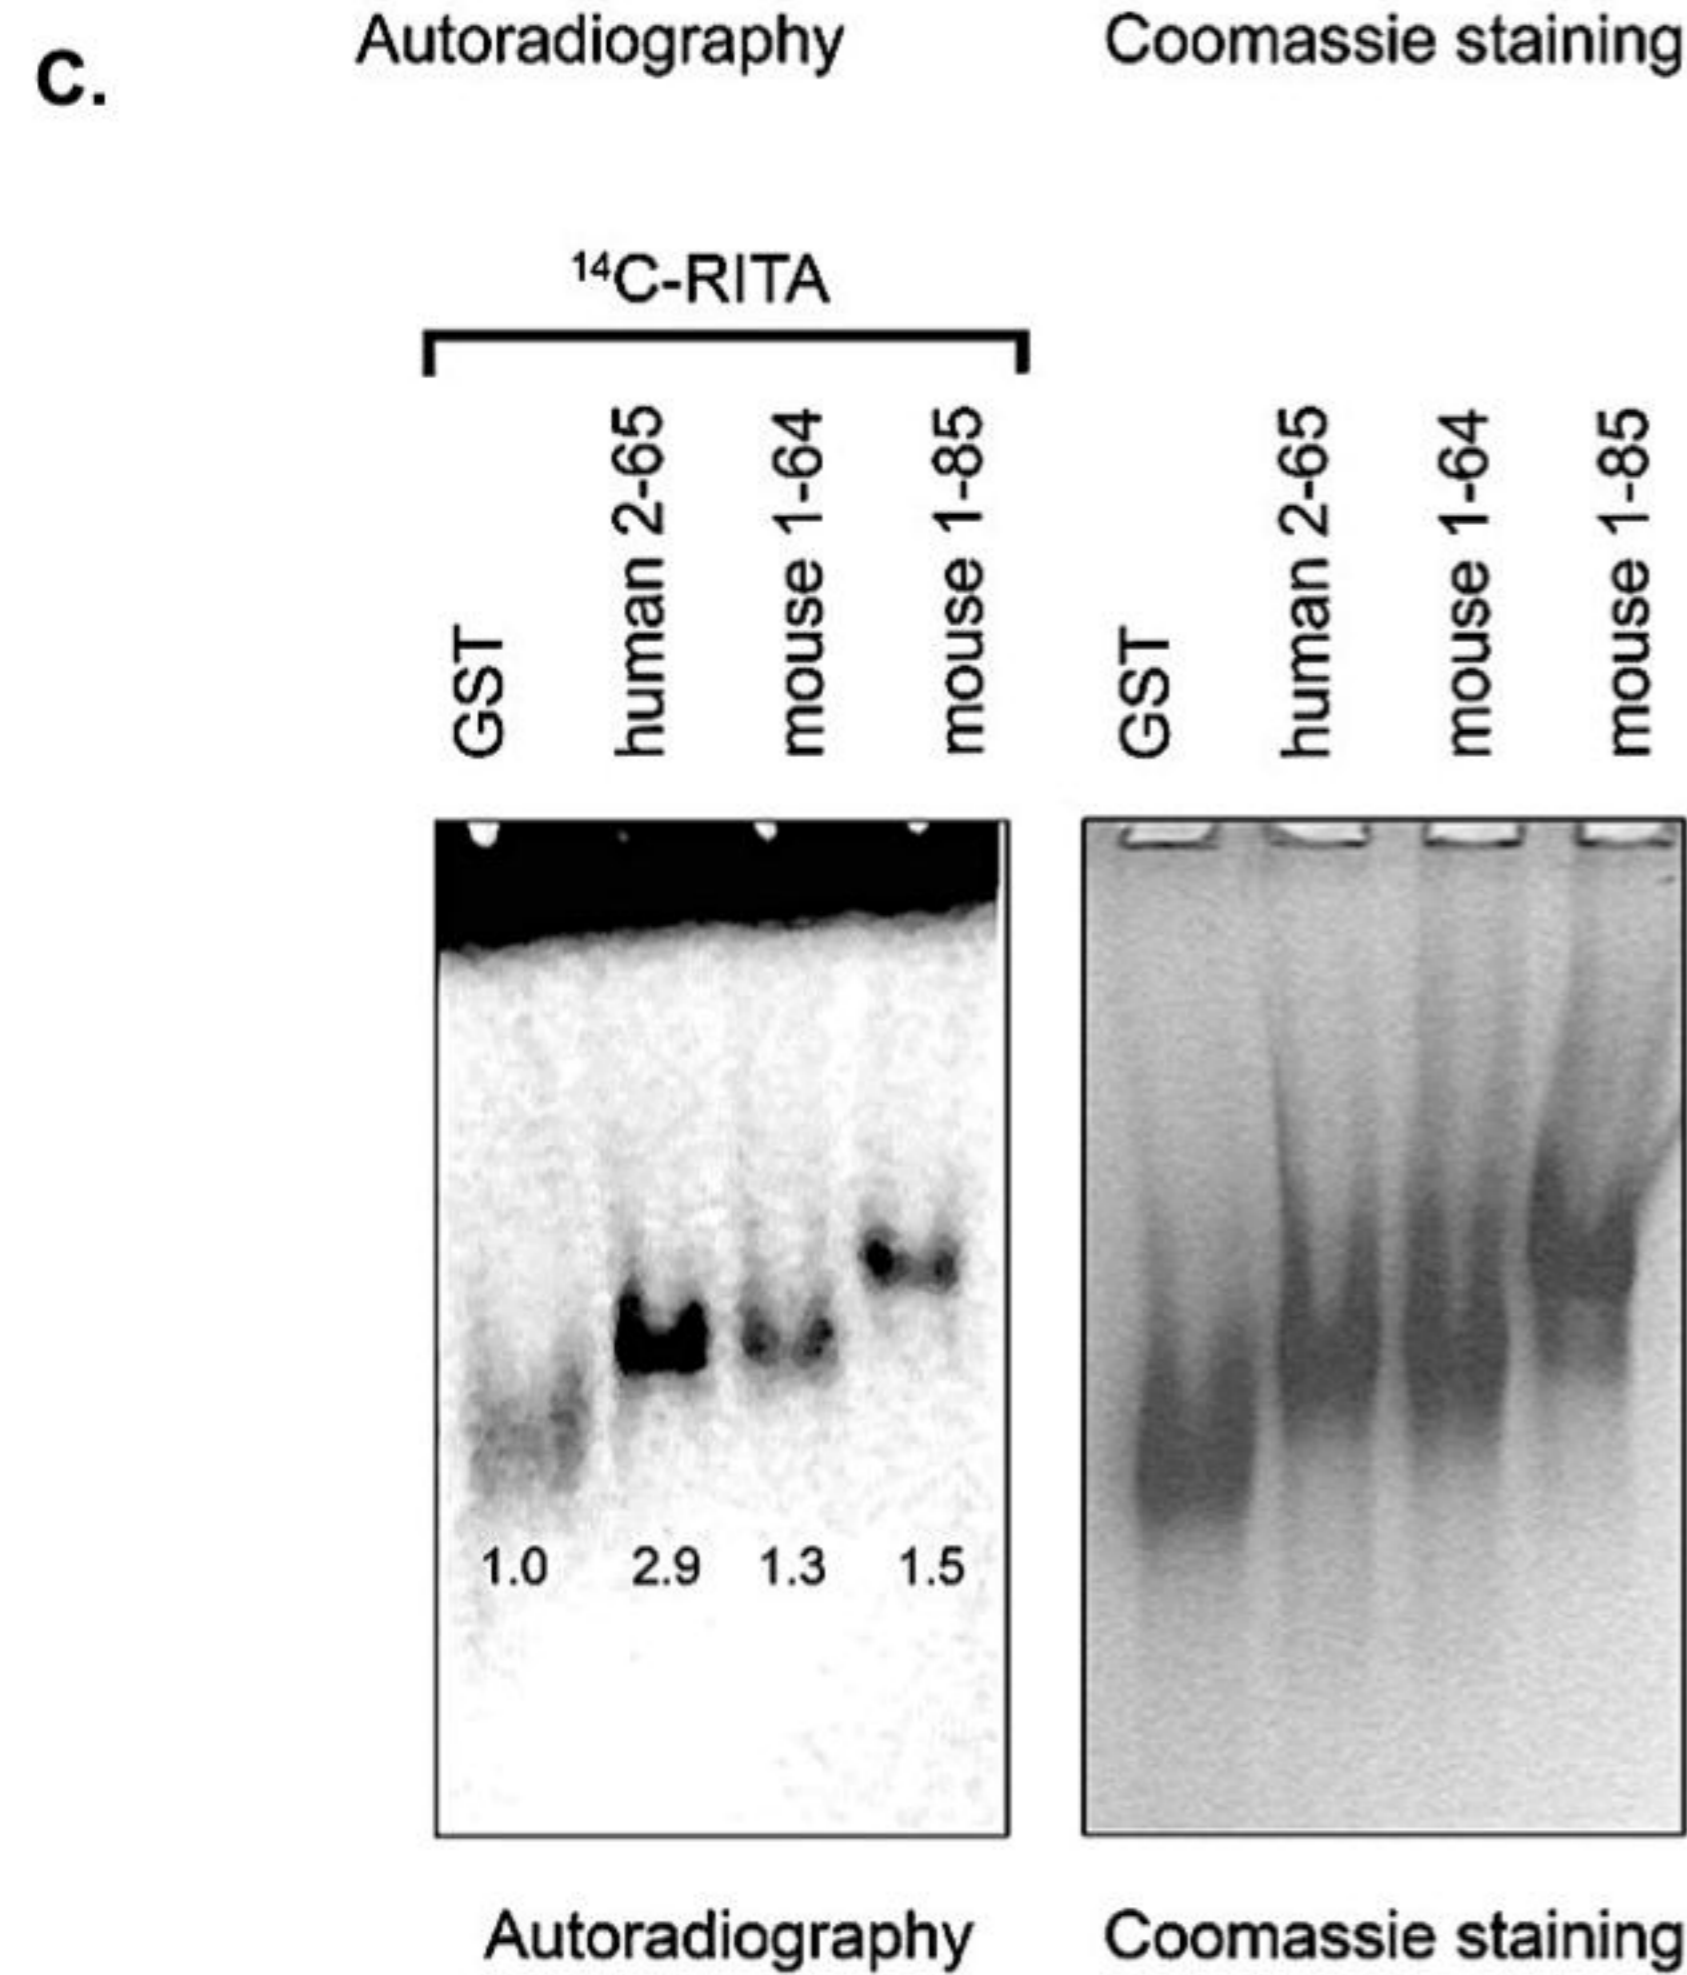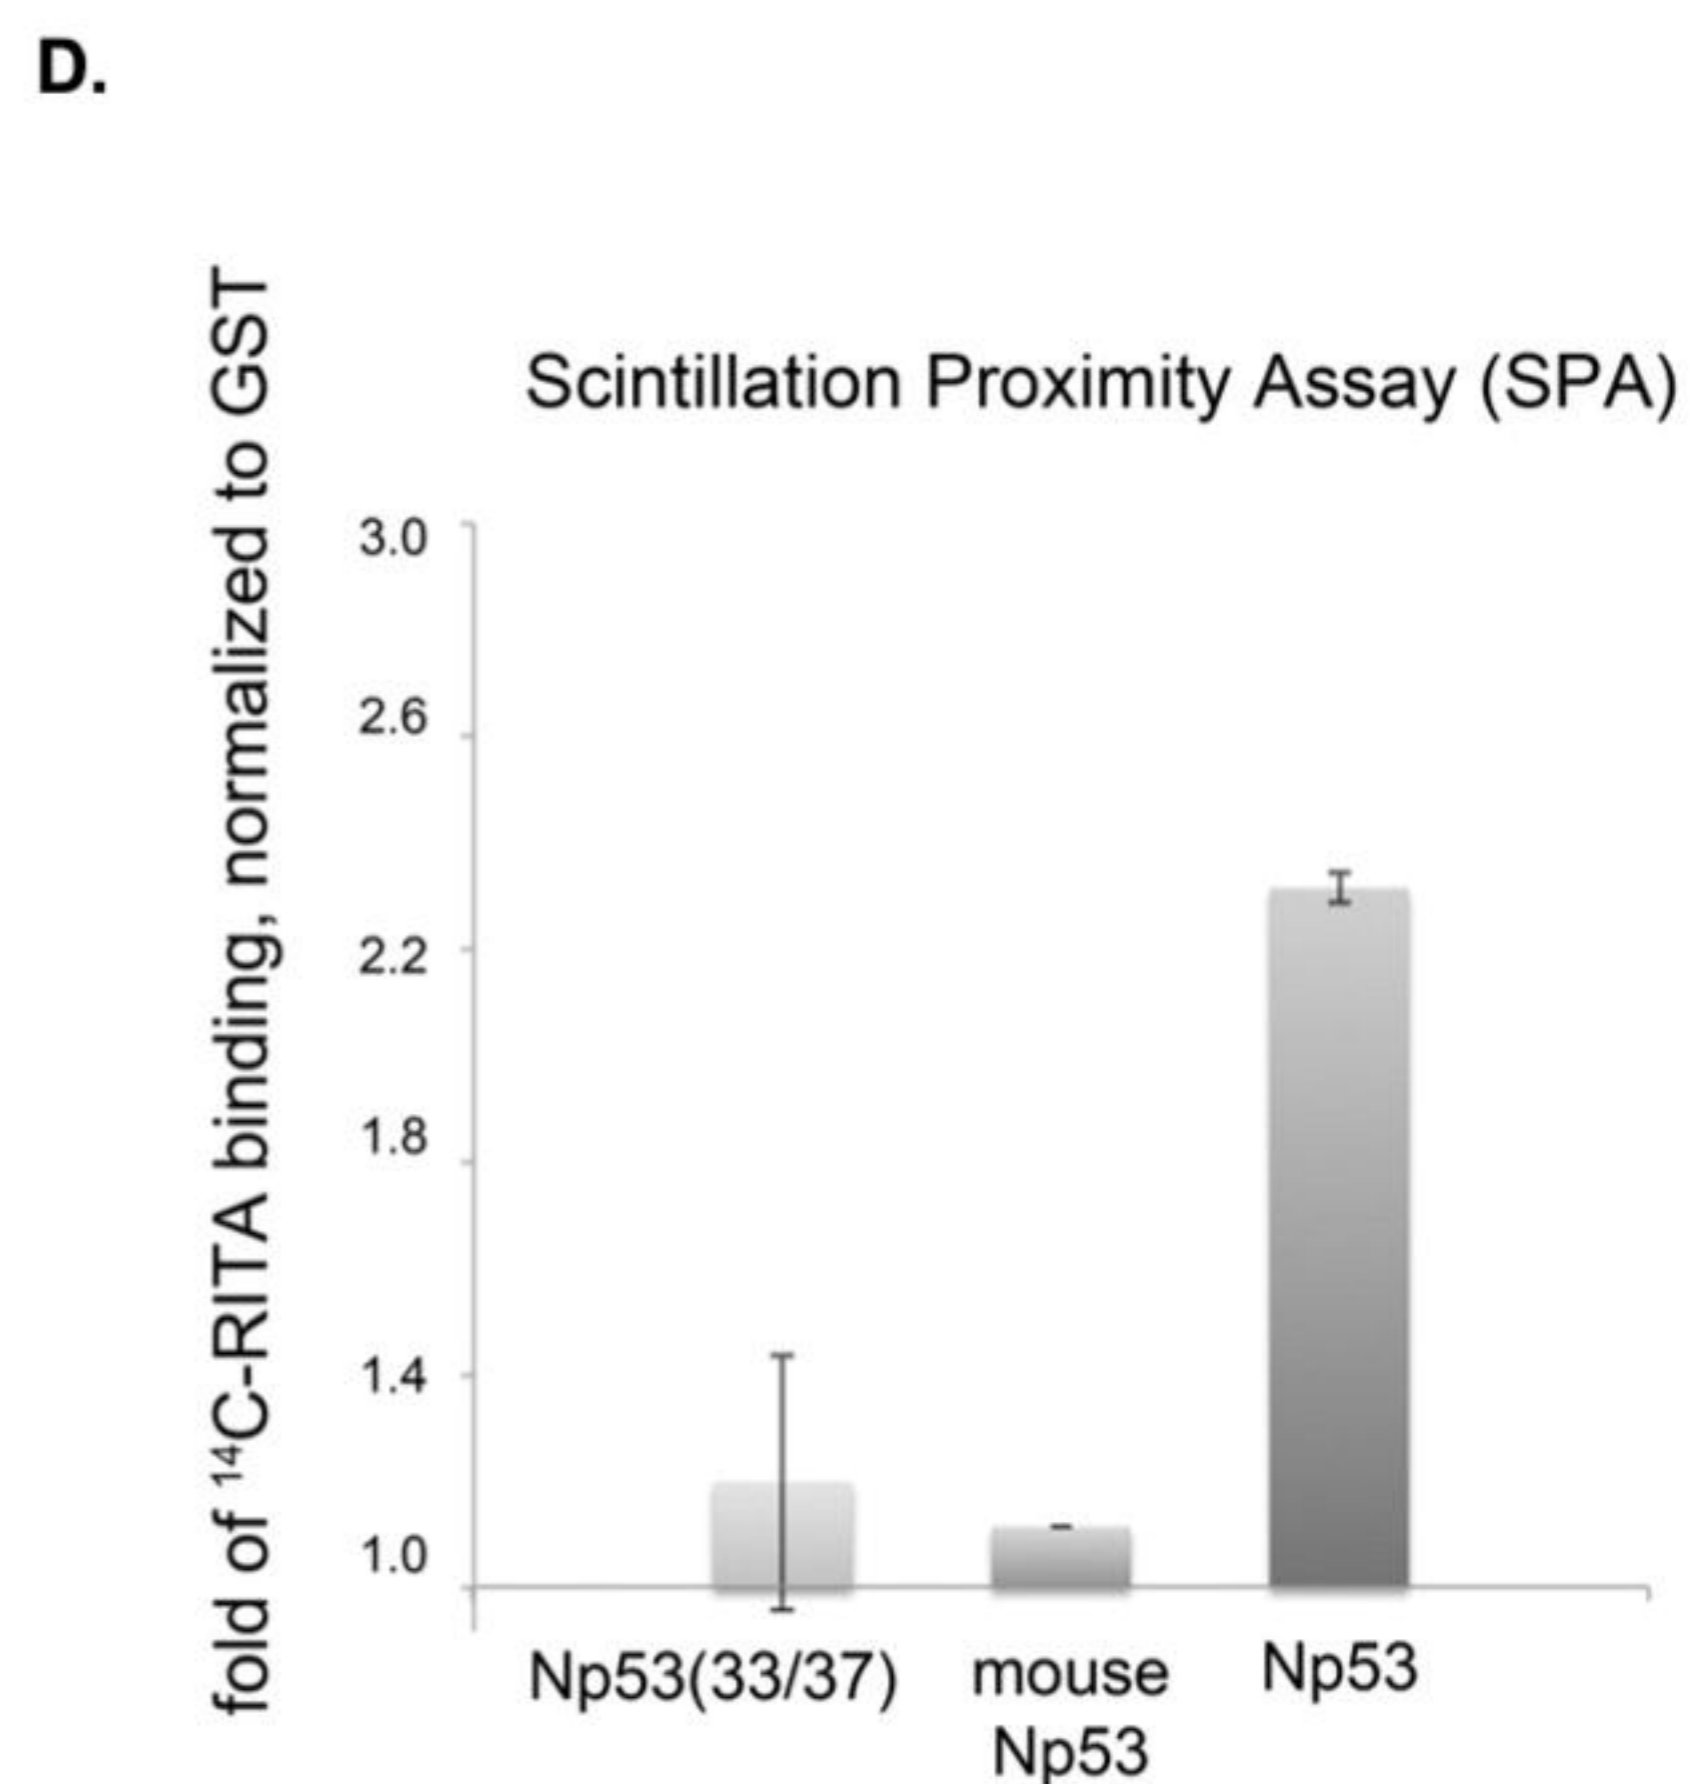

bioRxiv preprint doi: <https://doi.org/10.1101/2021.12.24.474003>; this version posted December 24, 2021. The copyright holder for this preprint (which was not certified by peer review) is the author/funder, who has granted bioRxiv a license to display the preprint in perpetuity. It is made available under aCC-BY-NC-ND 4.0 International license.

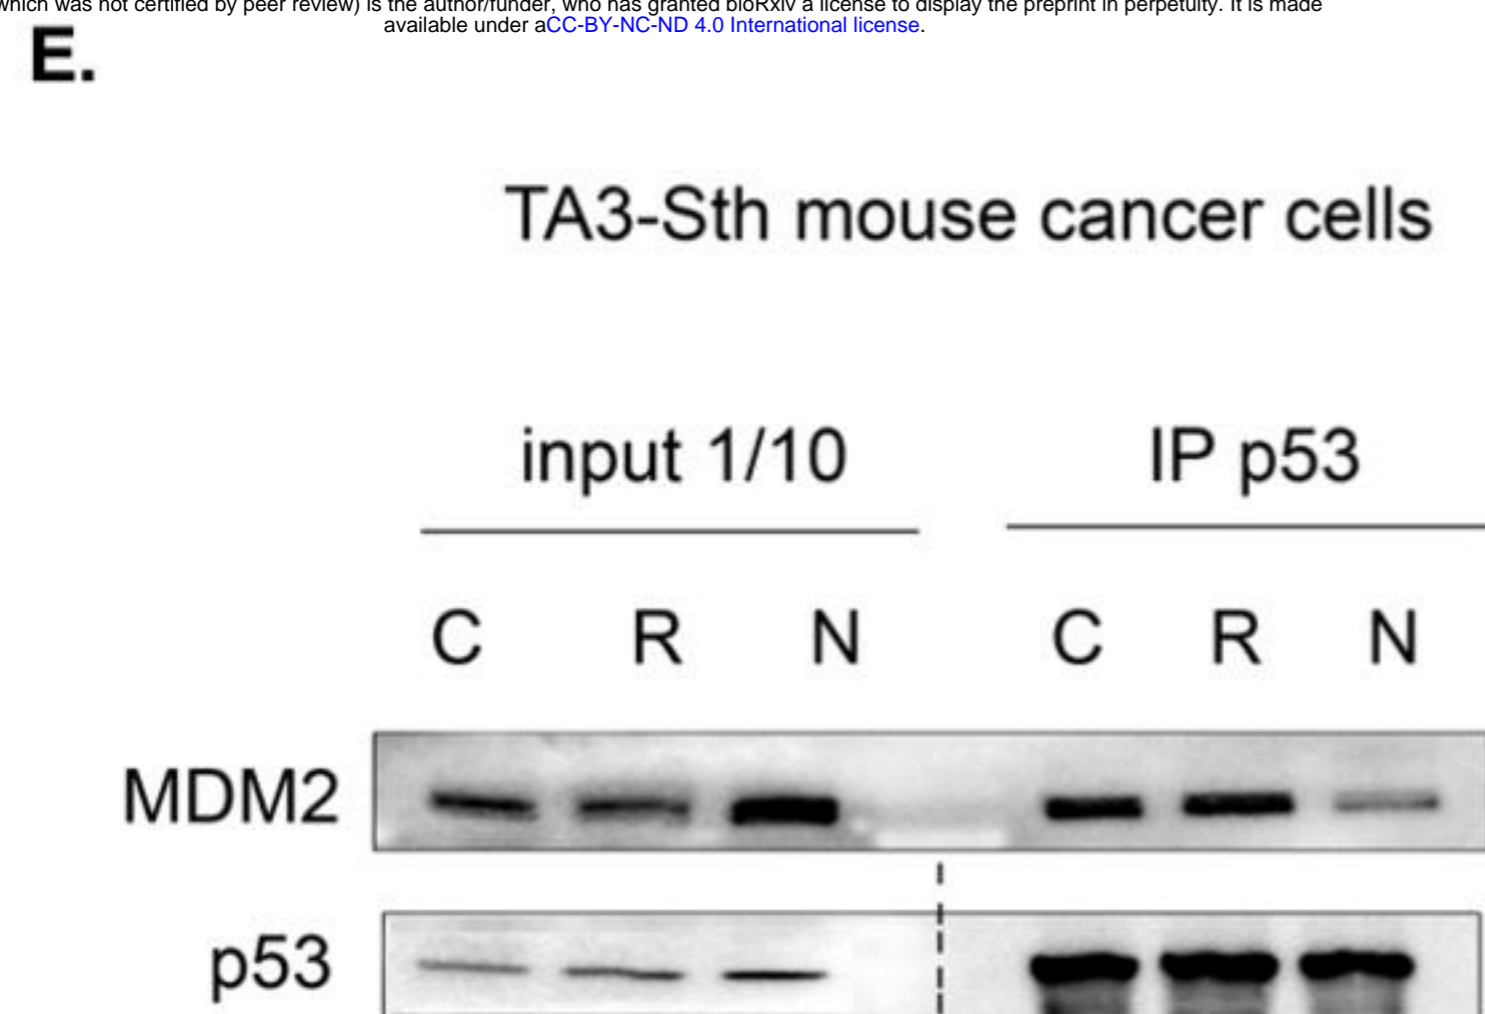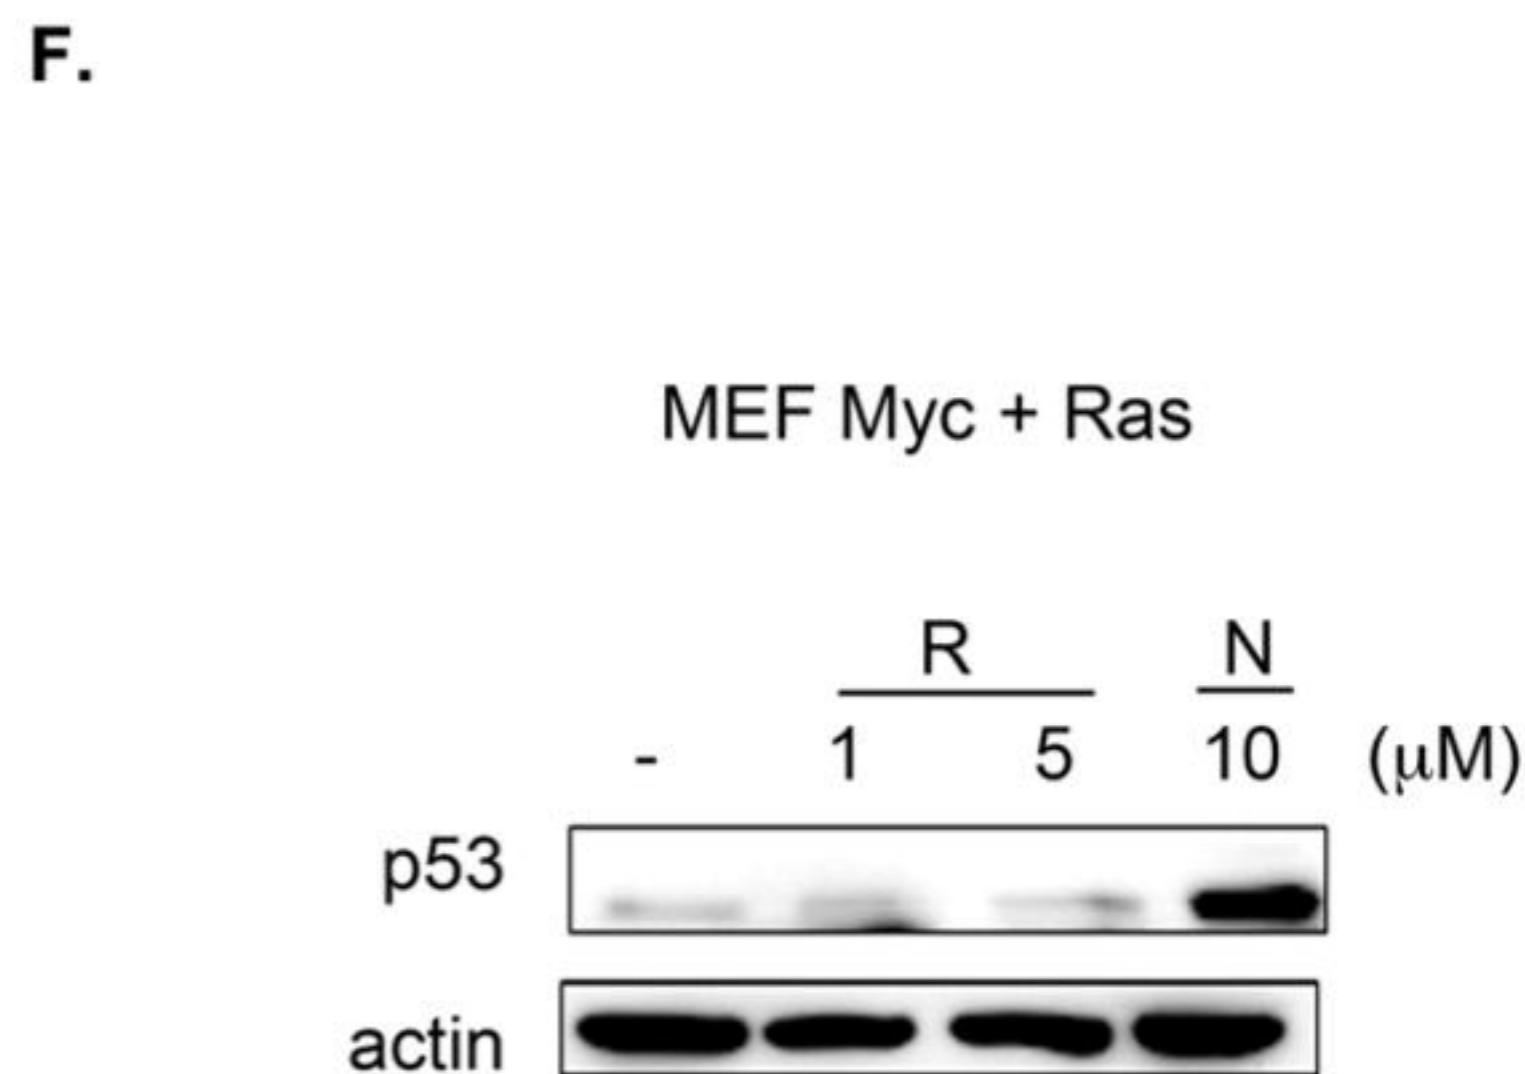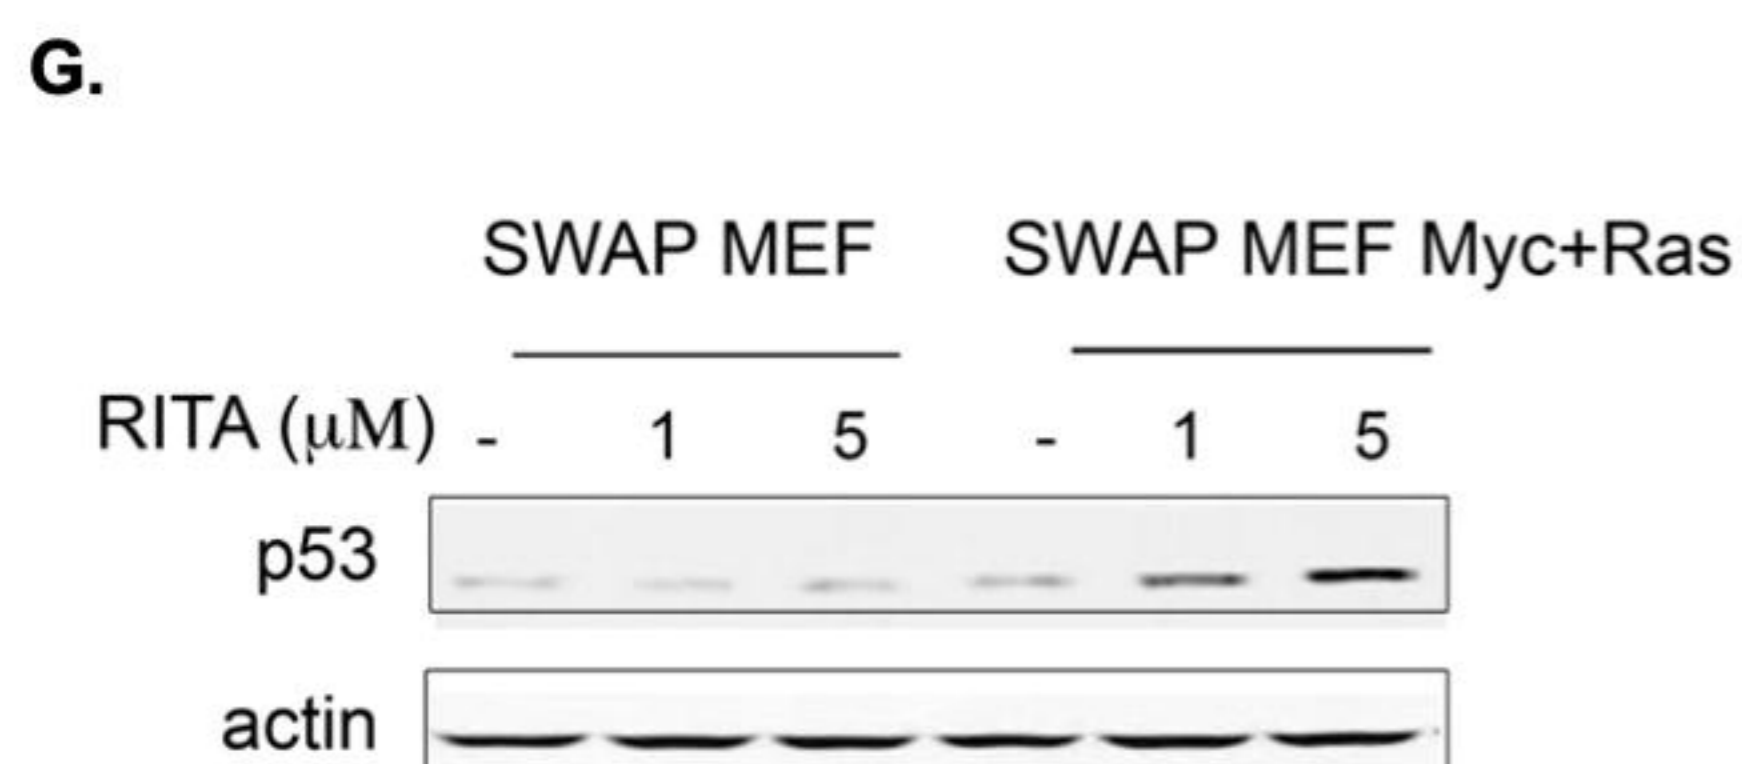

A.

## Yeast-based reporter assay

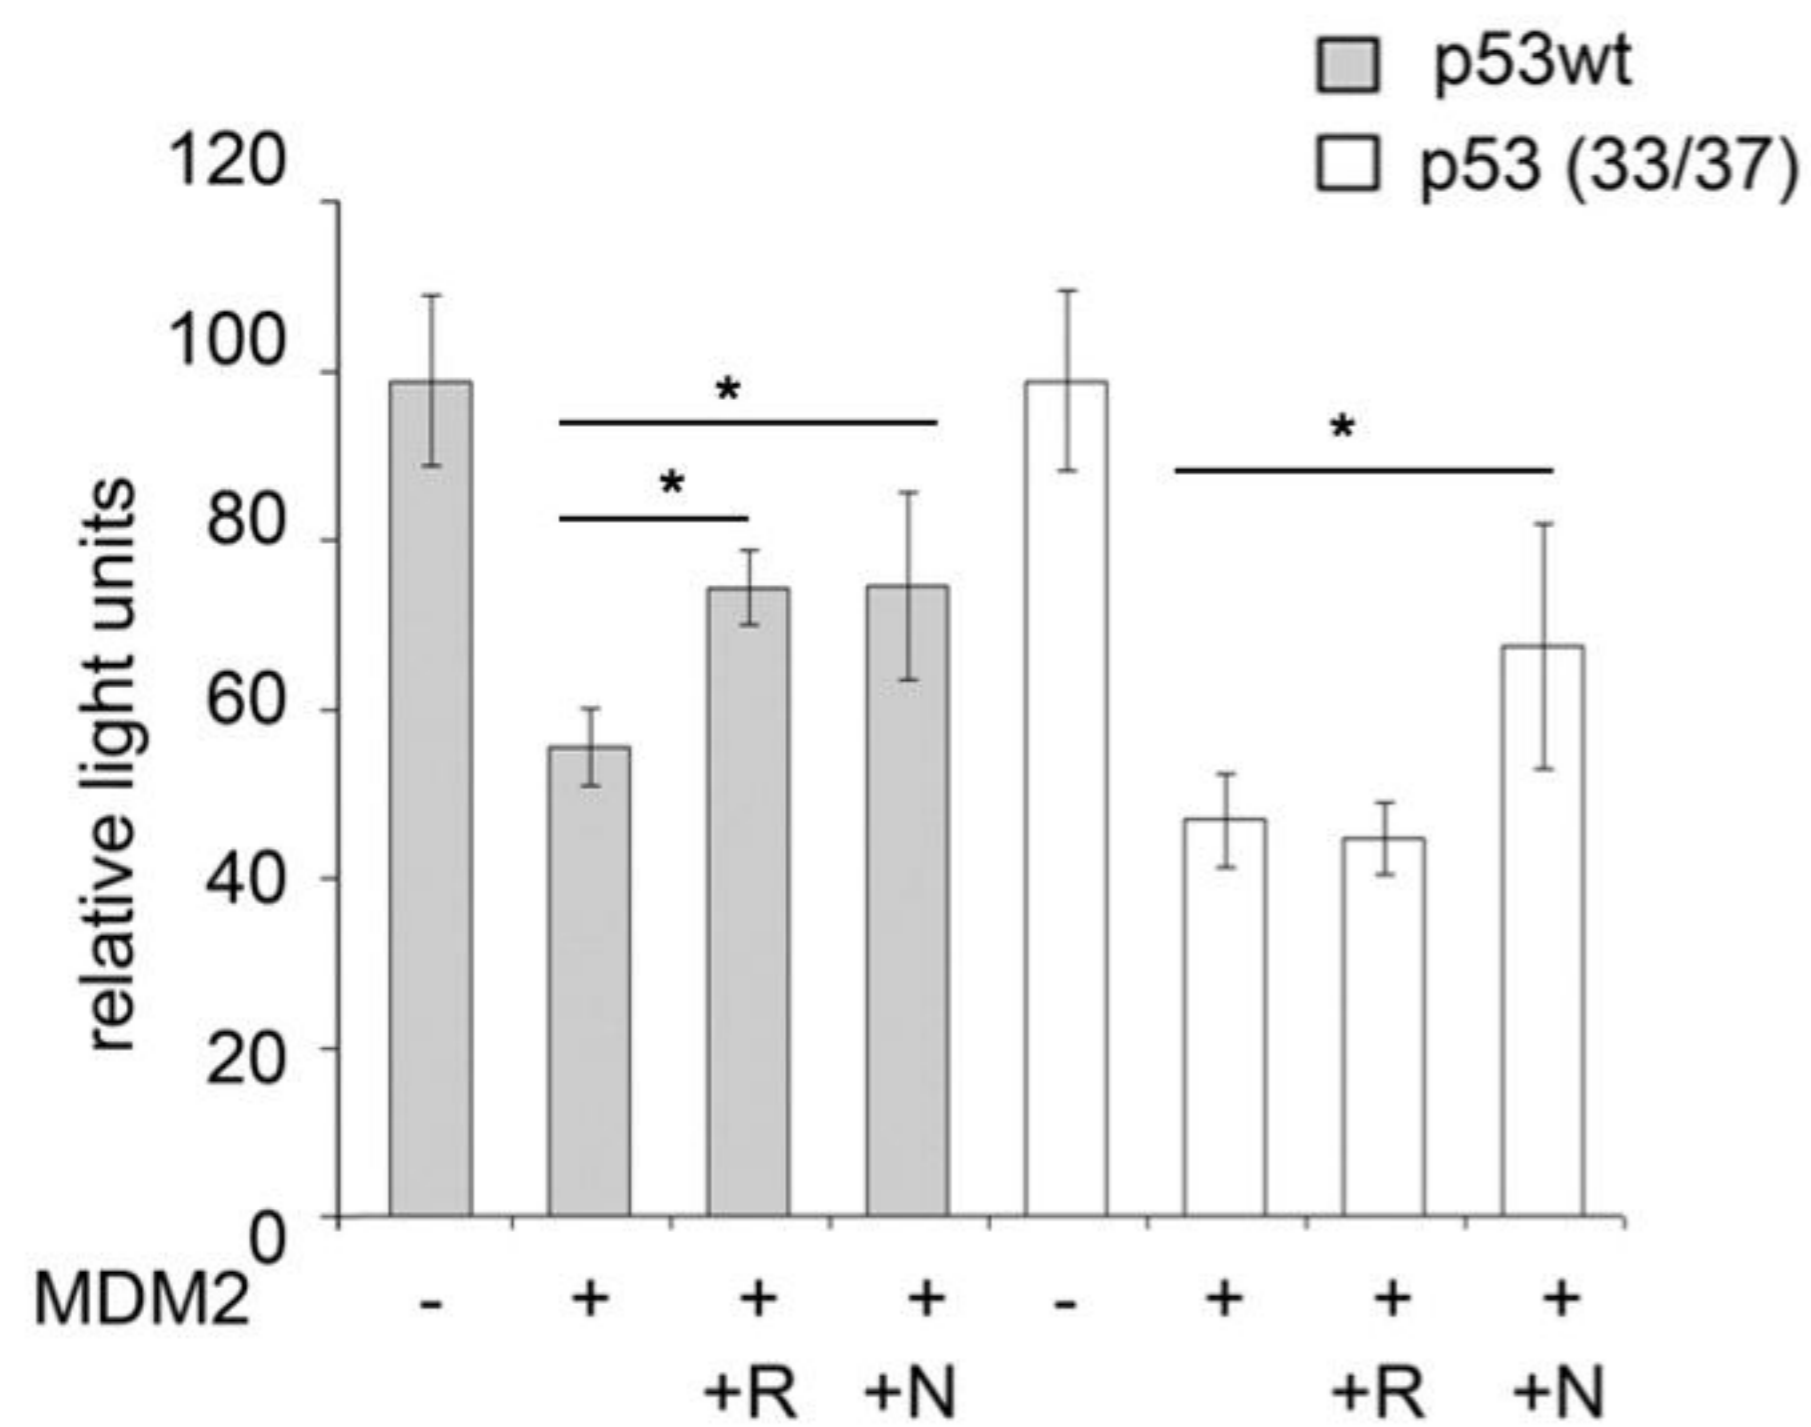

C.

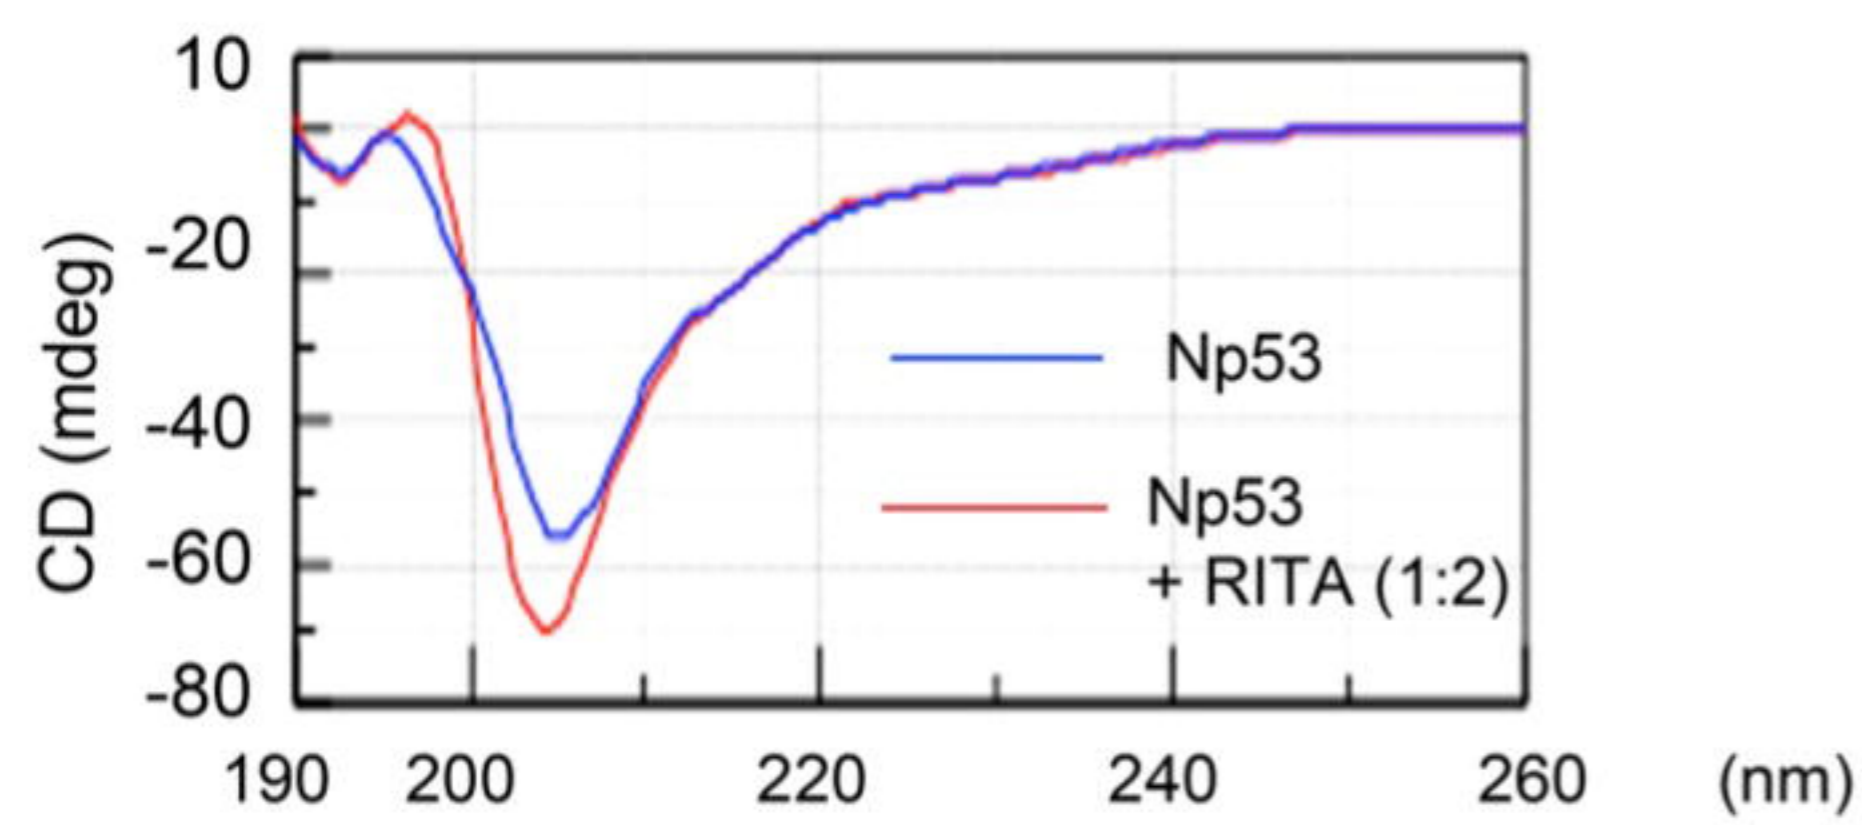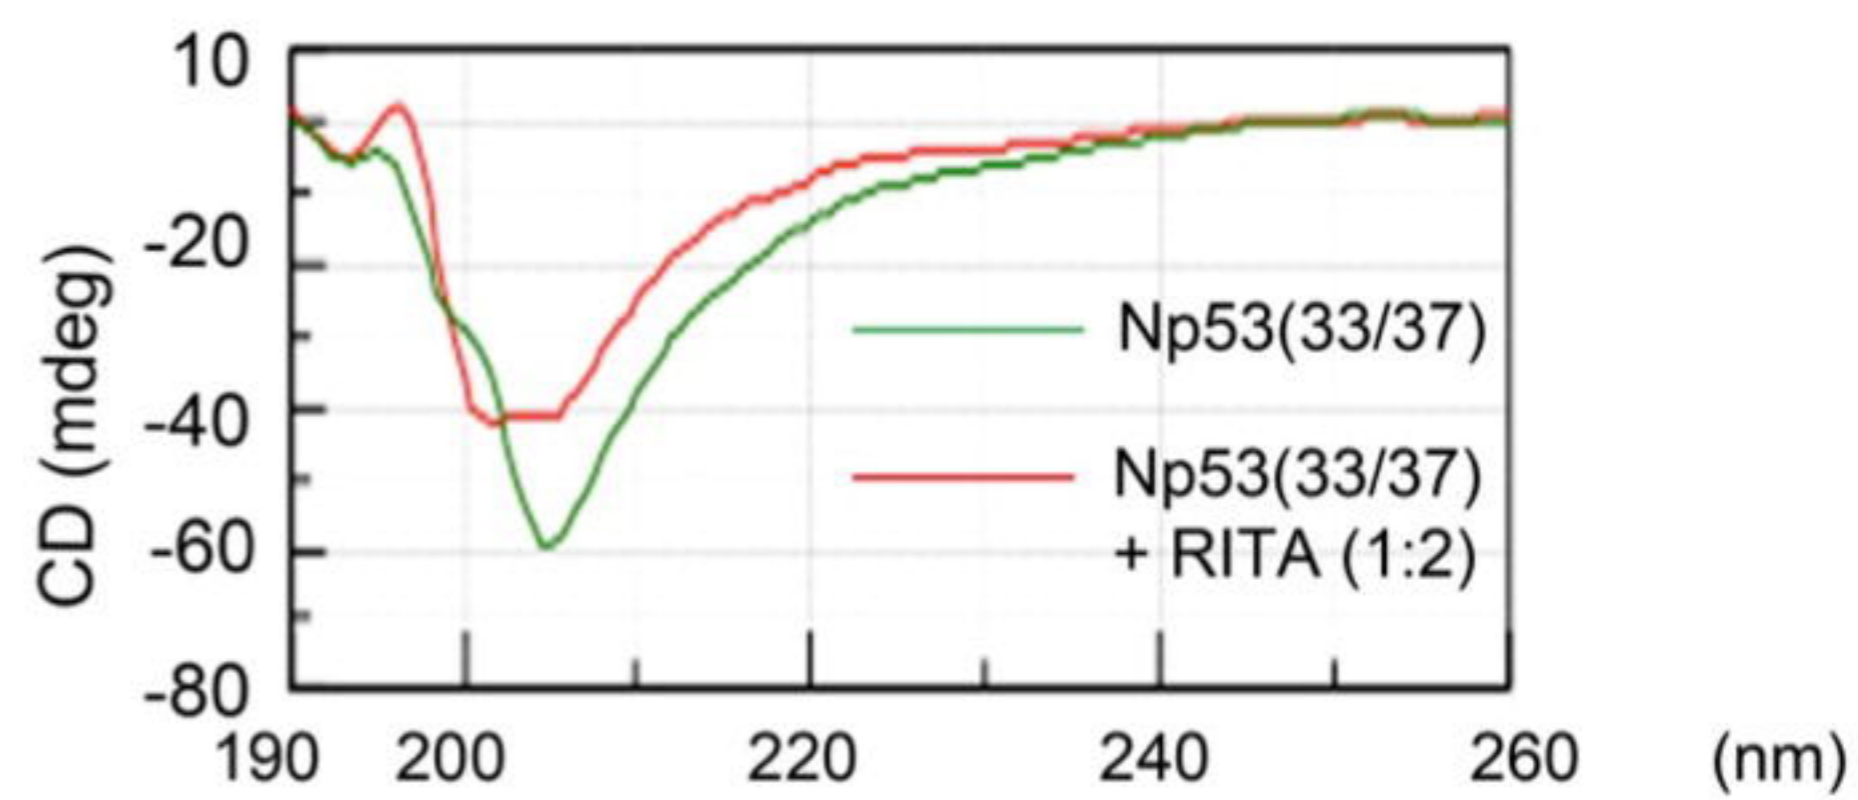

D.

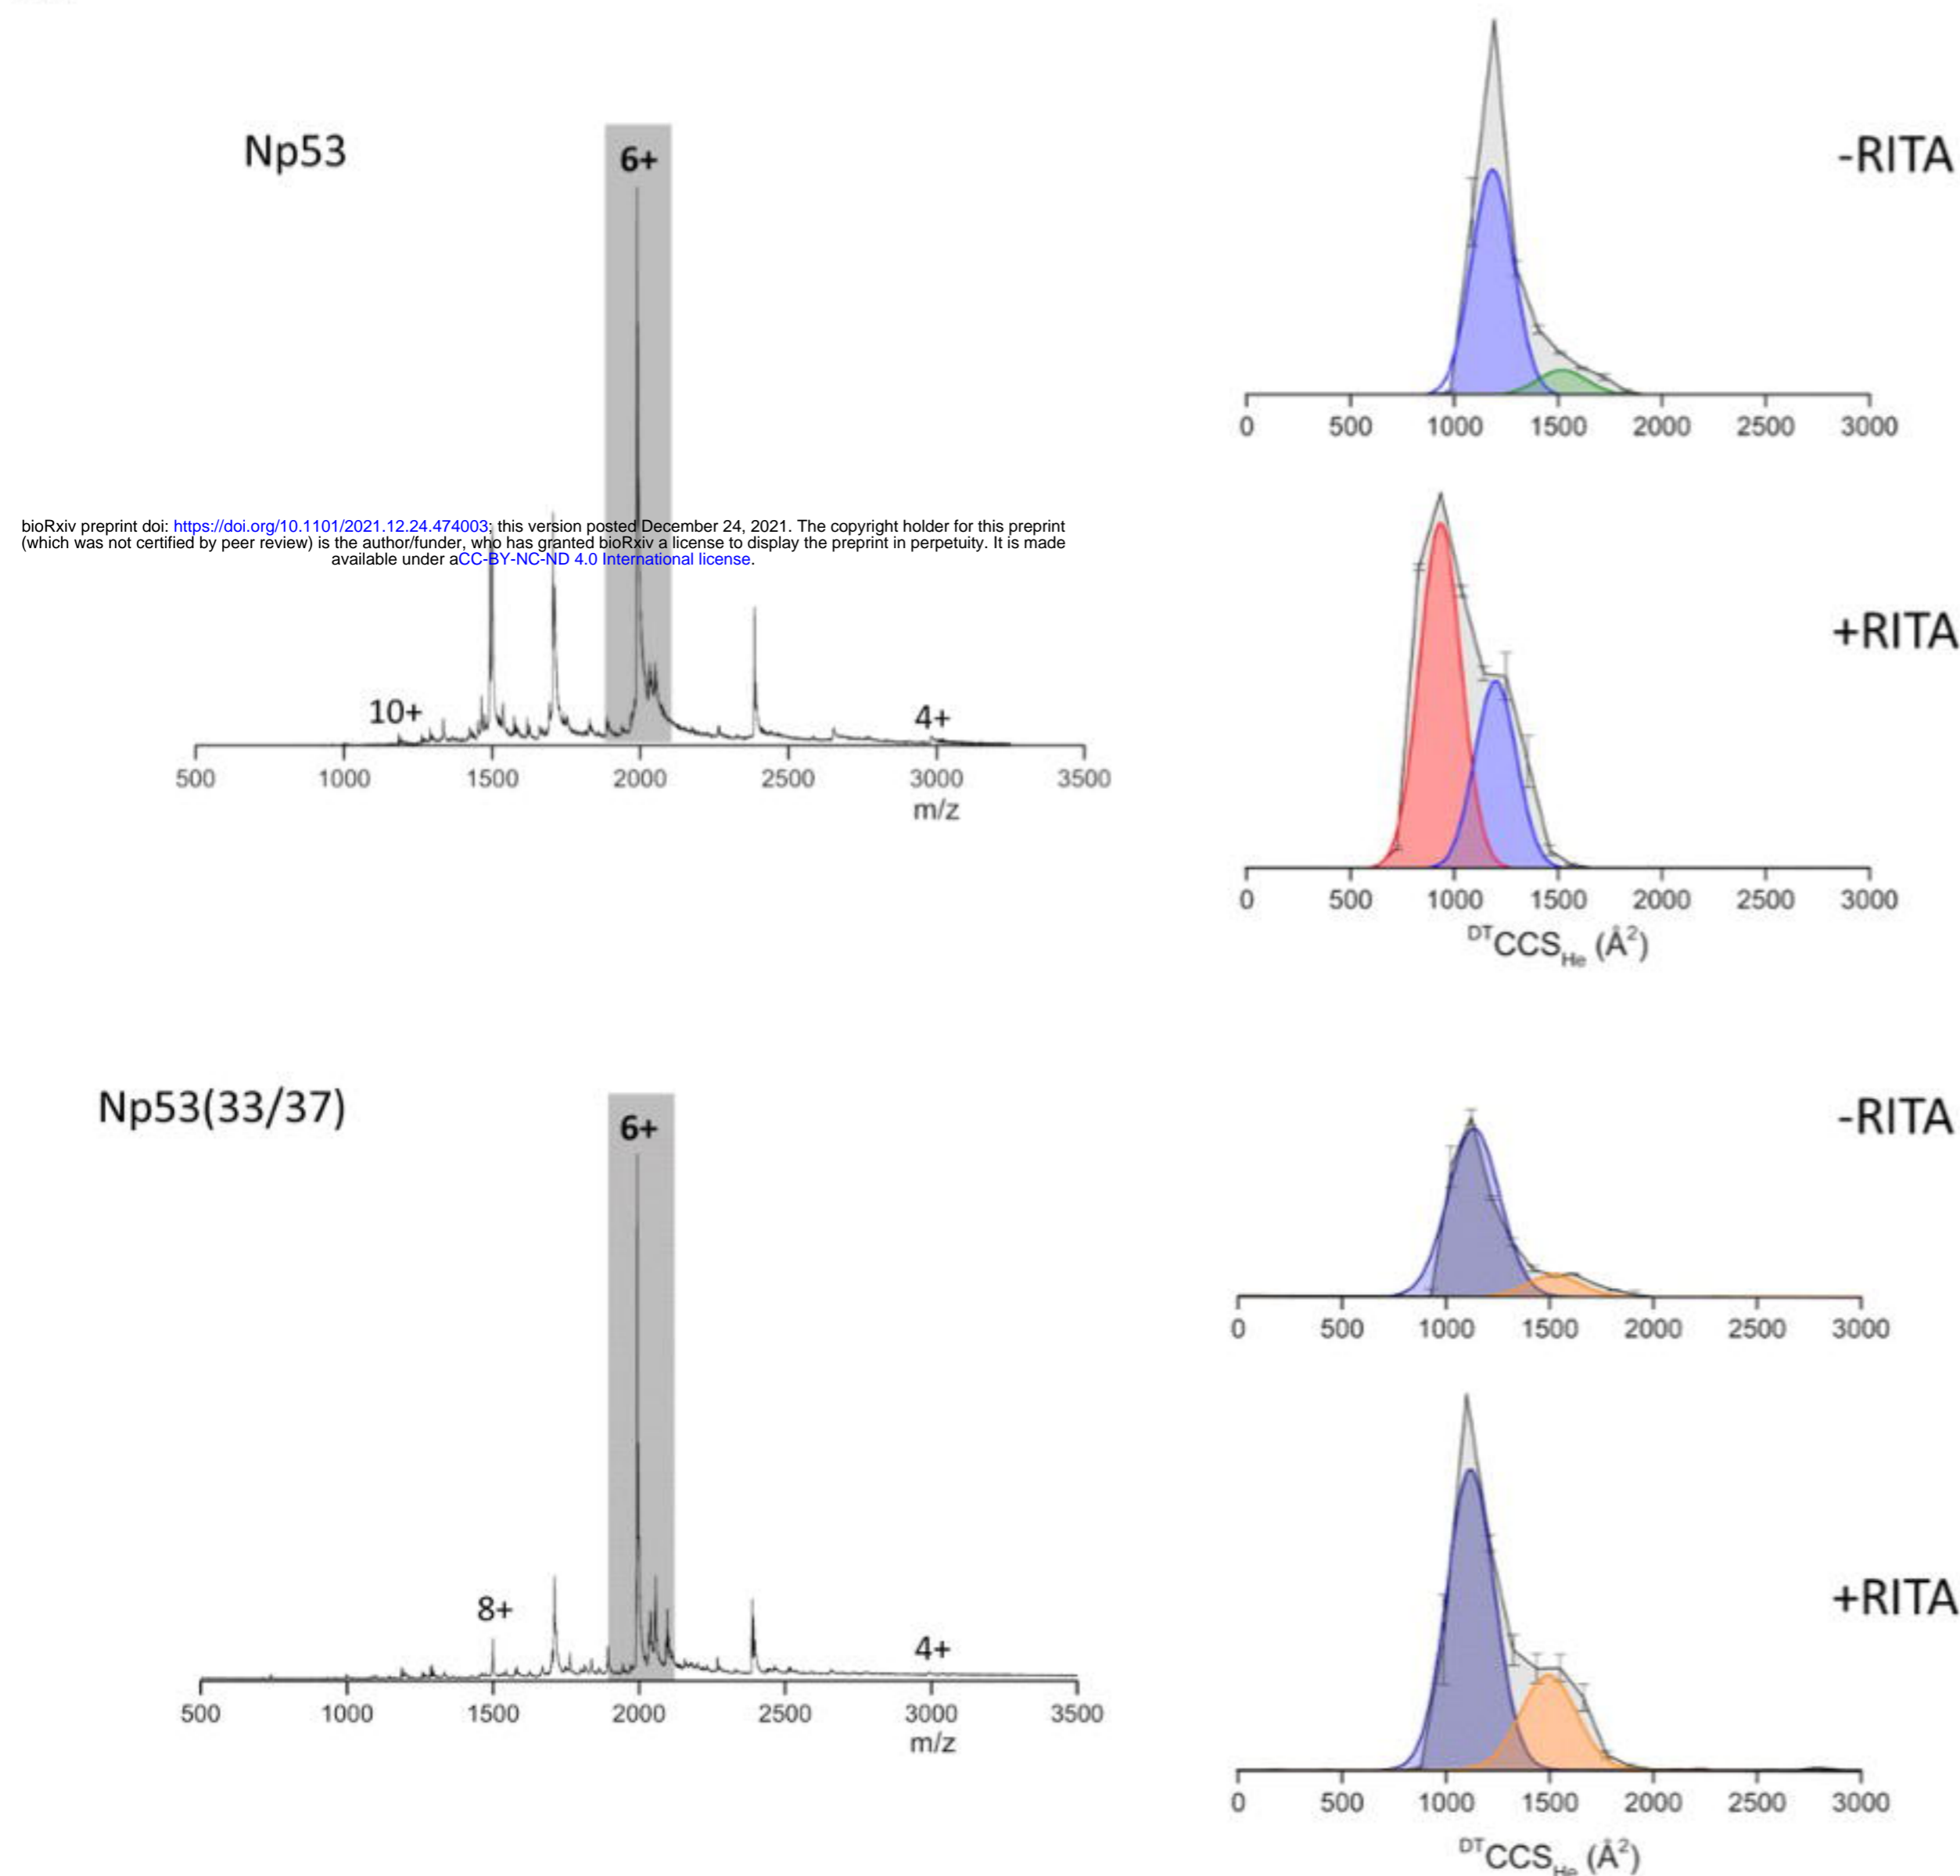

B.

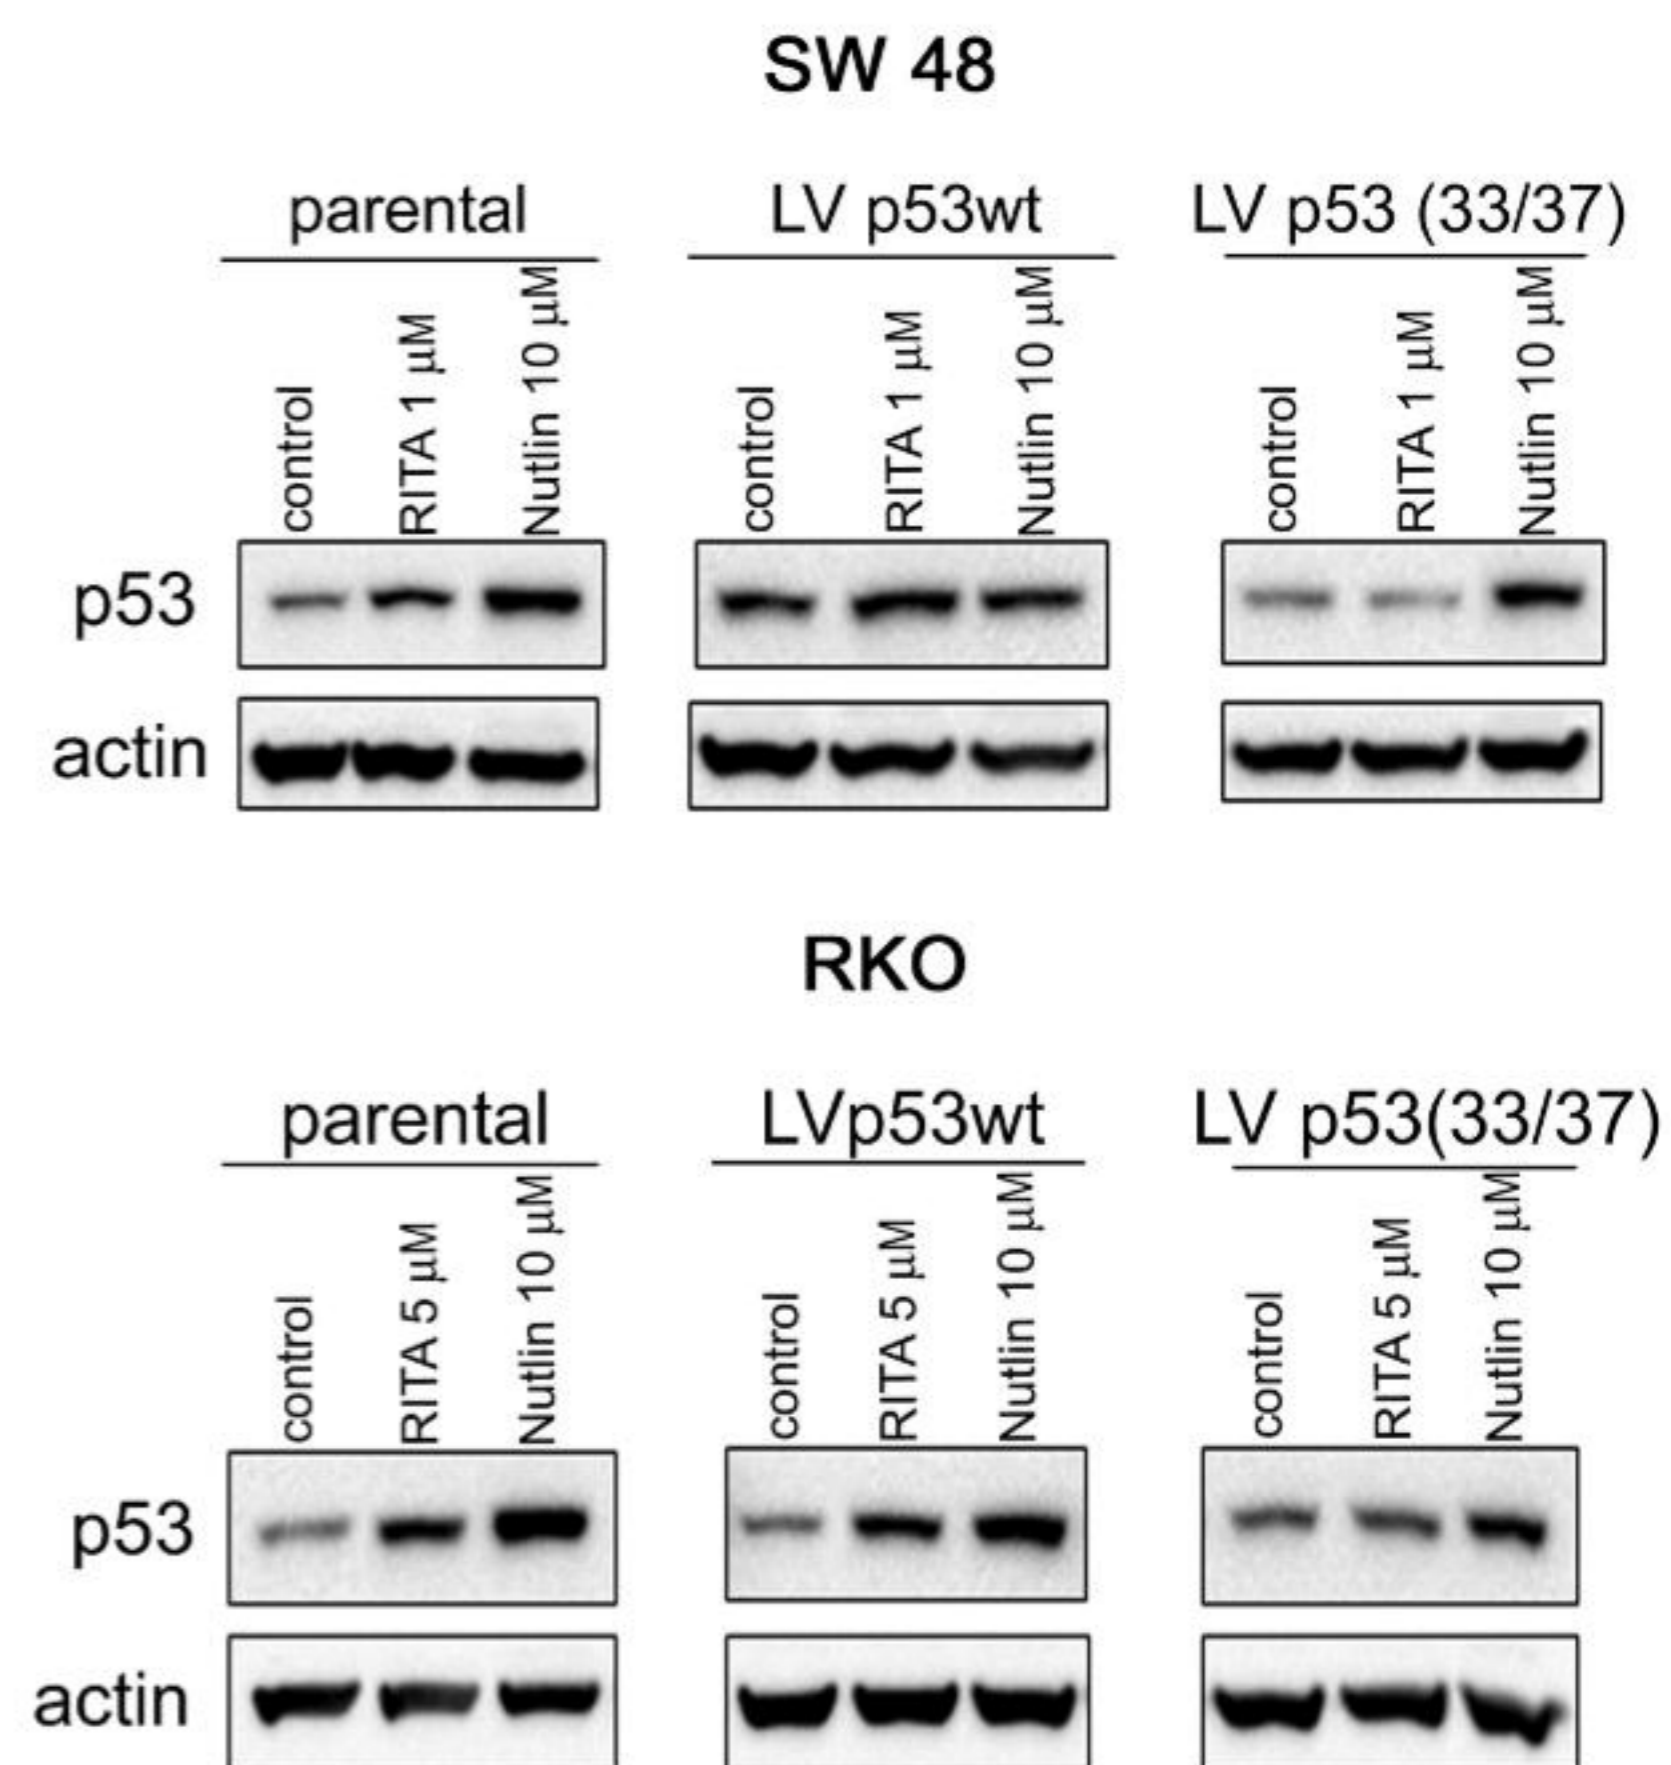

E.

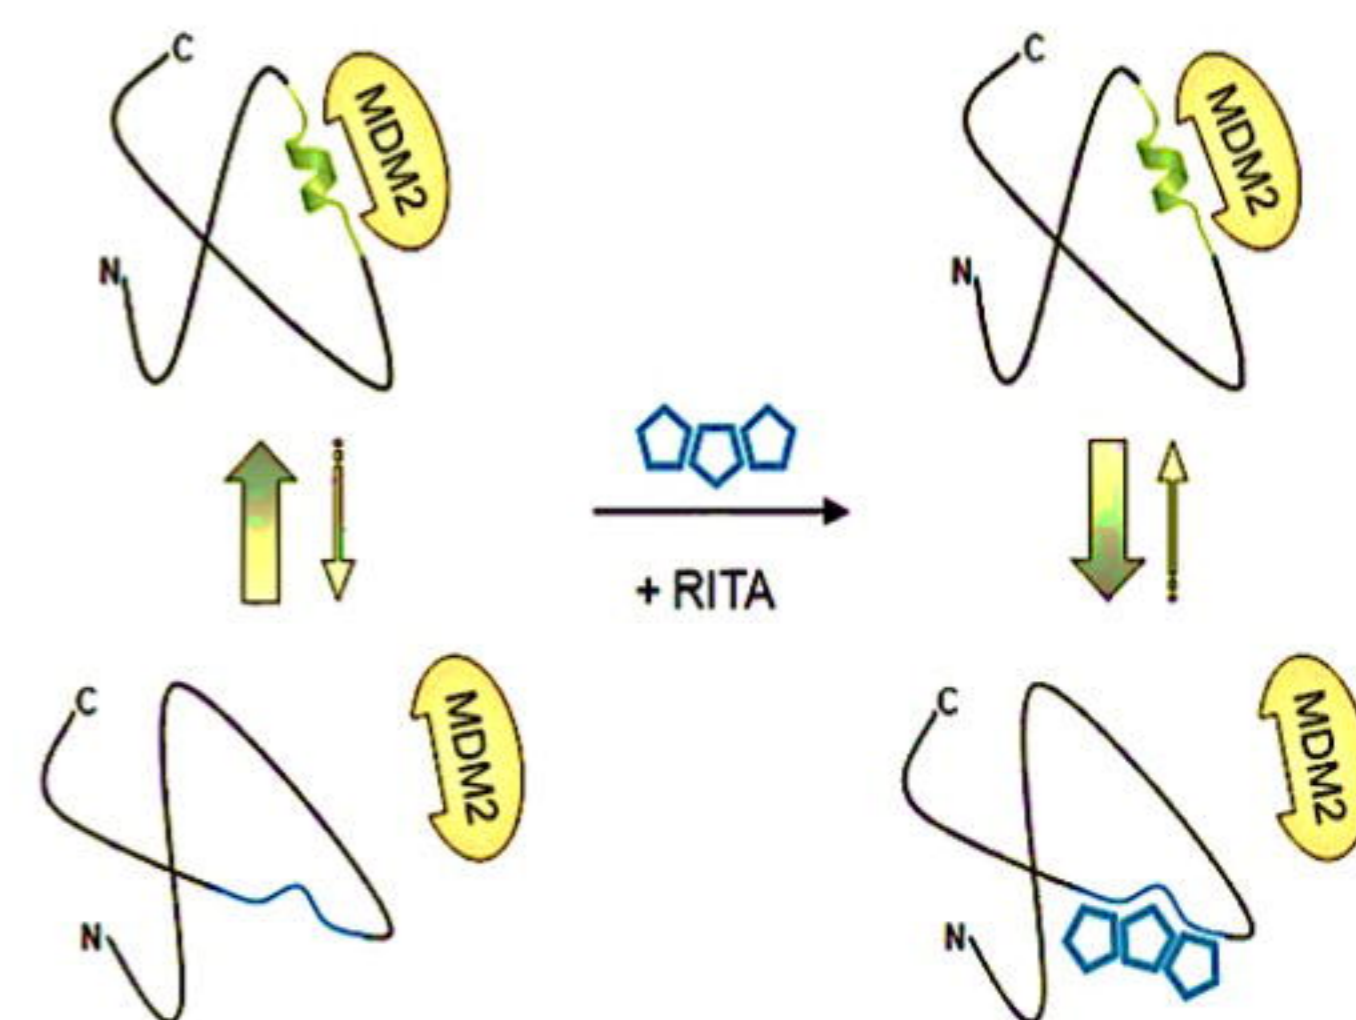

Source: https://www.biorxiv.org/content/10.1101/2021.12.24.474003v1.full.pdf
